# Supplementary material
Source: PubMed Central journal article supplement (PMC4033657)
Supplement: jo500599h_si_001.pdf [file jo500599h_si_001.pdf]

## Supporting Information

### Boron Carboxylate Catalysis of Homoallylboration

Gabrielle J. Dugas,<sup>†</sup> Yu-hong Lam,<sup>‡</sup> K. N. Houk<sup>\*,‡</sup> and Isaac J. Krauss<sup>\*,†</sup>

<sup>†</sup> Department of Chemistry, Brandeis University, Waltham, Massachusetts 02454-9110, United States

<sup>‡</sup> Department of Chemistry and Biochemistry, University of California, Los Angeles, California 90095-1569, United States

[kraussi@brandeis.edu](mailto:kraussi@brandeis.edu), [houk@chem.ucla.edu](mailto:houk@chem.ucla.edu)

Page S2: Spectra

Page S46: Computational Section

400 MHz  $^1\text{H}$  NMR spectrum of **5a** ( $\text{CDCl}_3$ )

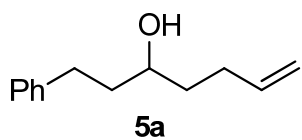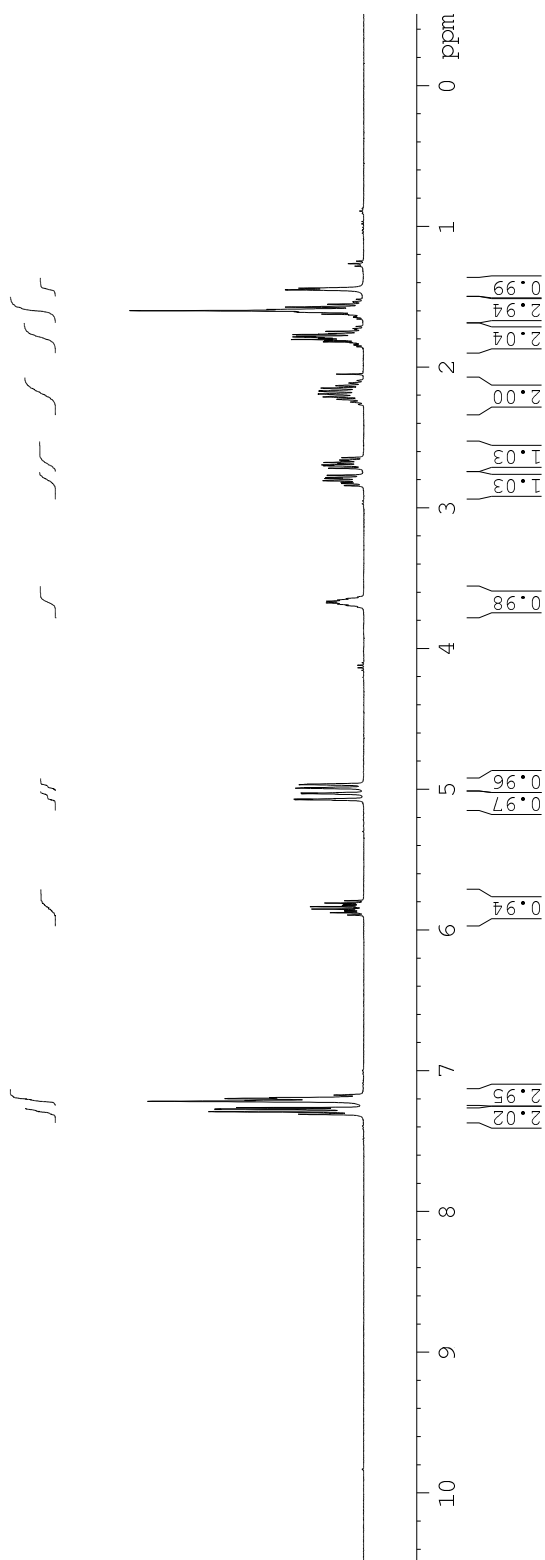

400 MHz  $^1\text{H}$  NMR spectrum of **5b** ( $\text{CDCl}_3$ )

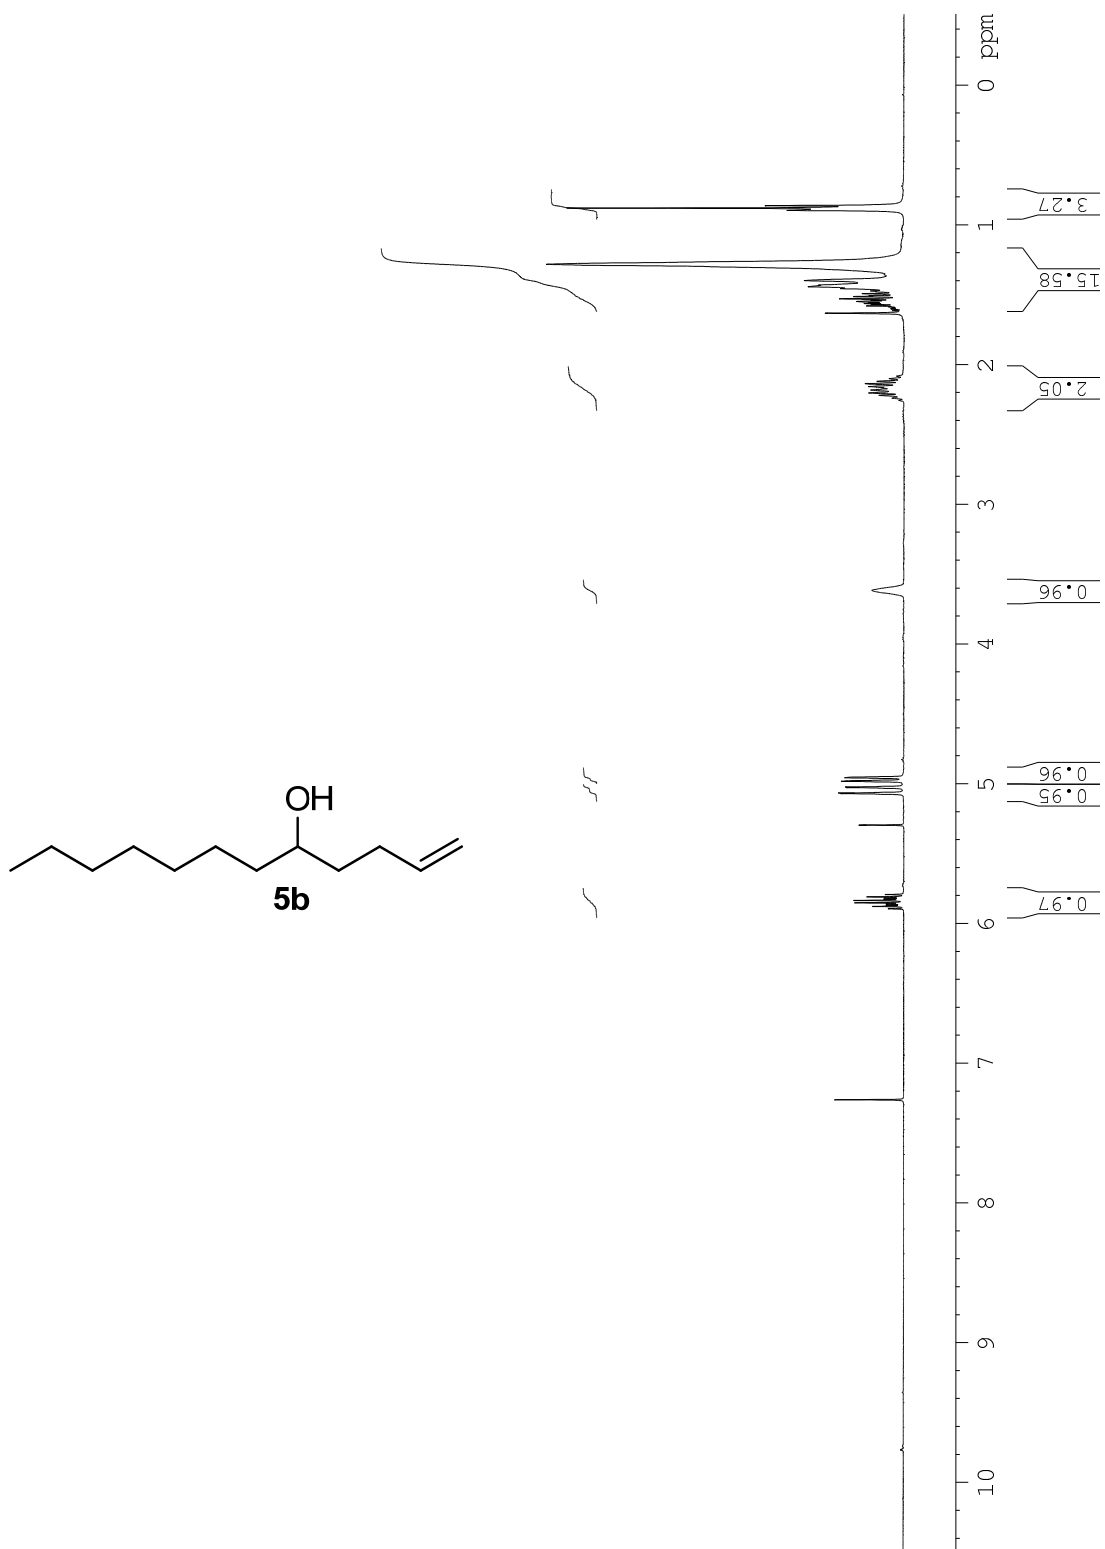

400 MHz  $^1\text{H}$  NMR spectrum of **5c** ( $\text{CDCl}_3$ )

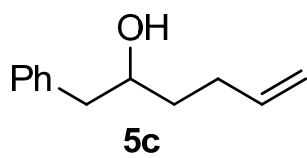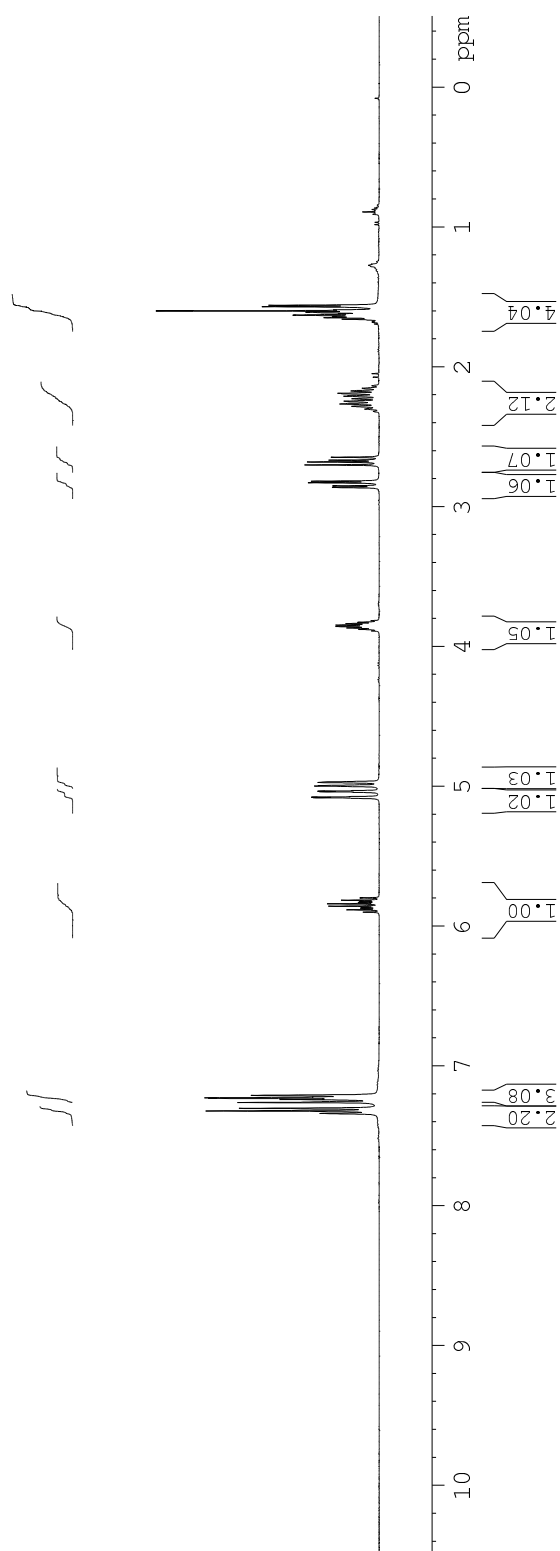

400 MHz  $^1\text{H}$  NMR spectrum of **5d** ( $\text{CDCl}_3$ )

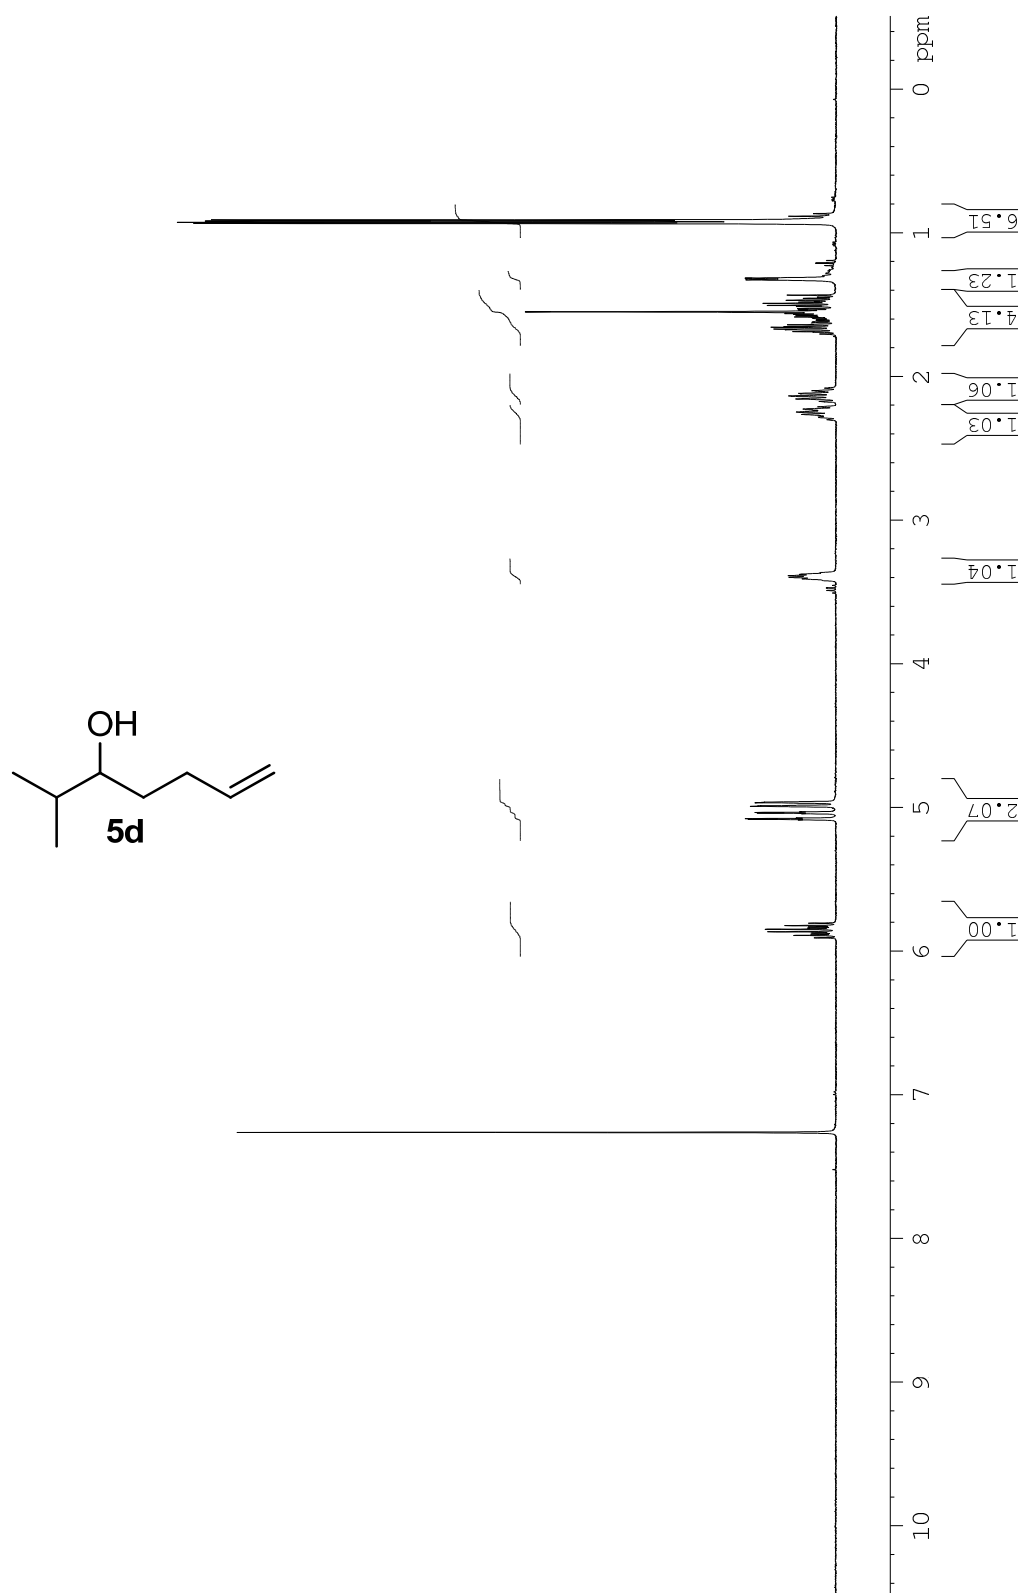

400 MHz  $^1\text{H}$  NMR spectrum of **5e** ( $\text{CDCl}_3$ )

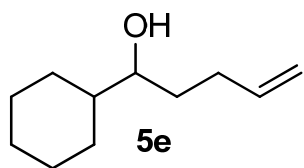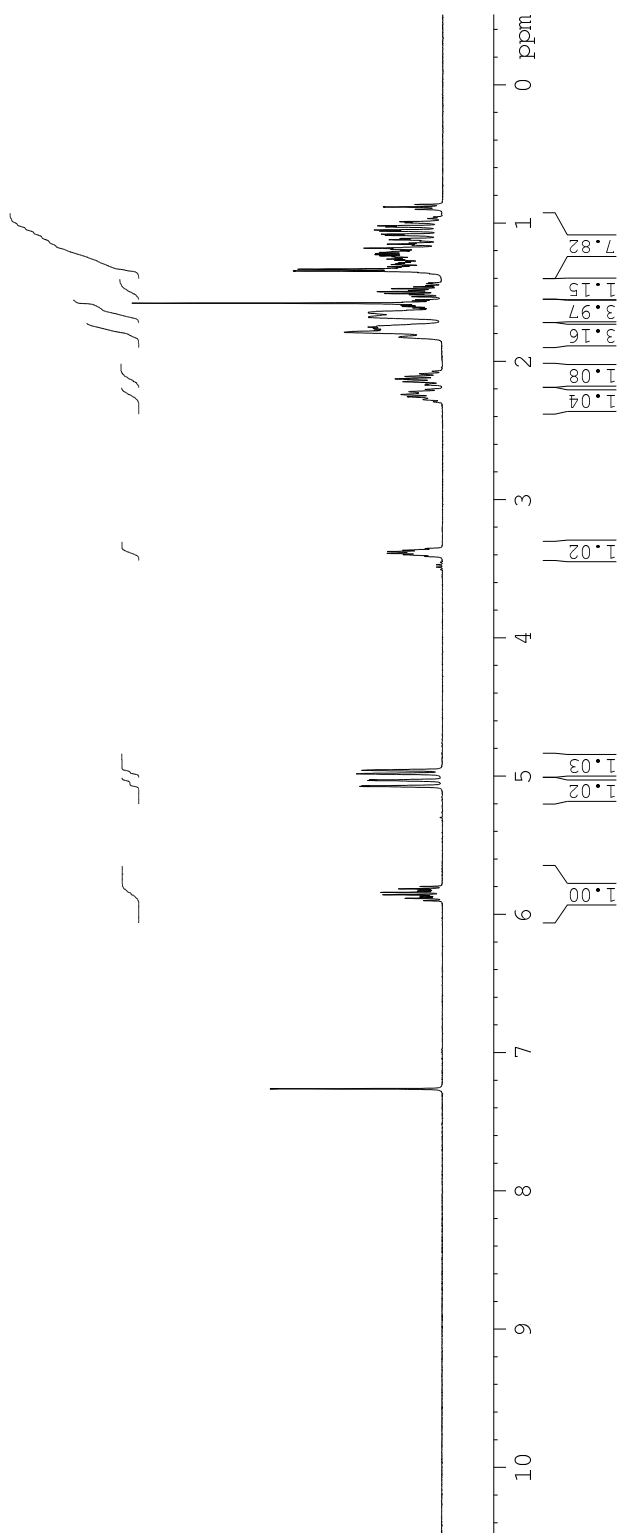

400 MHz  $^1\text{H}$  NMR spectrum of **5f** ( $\text{CDCl}_3$ )

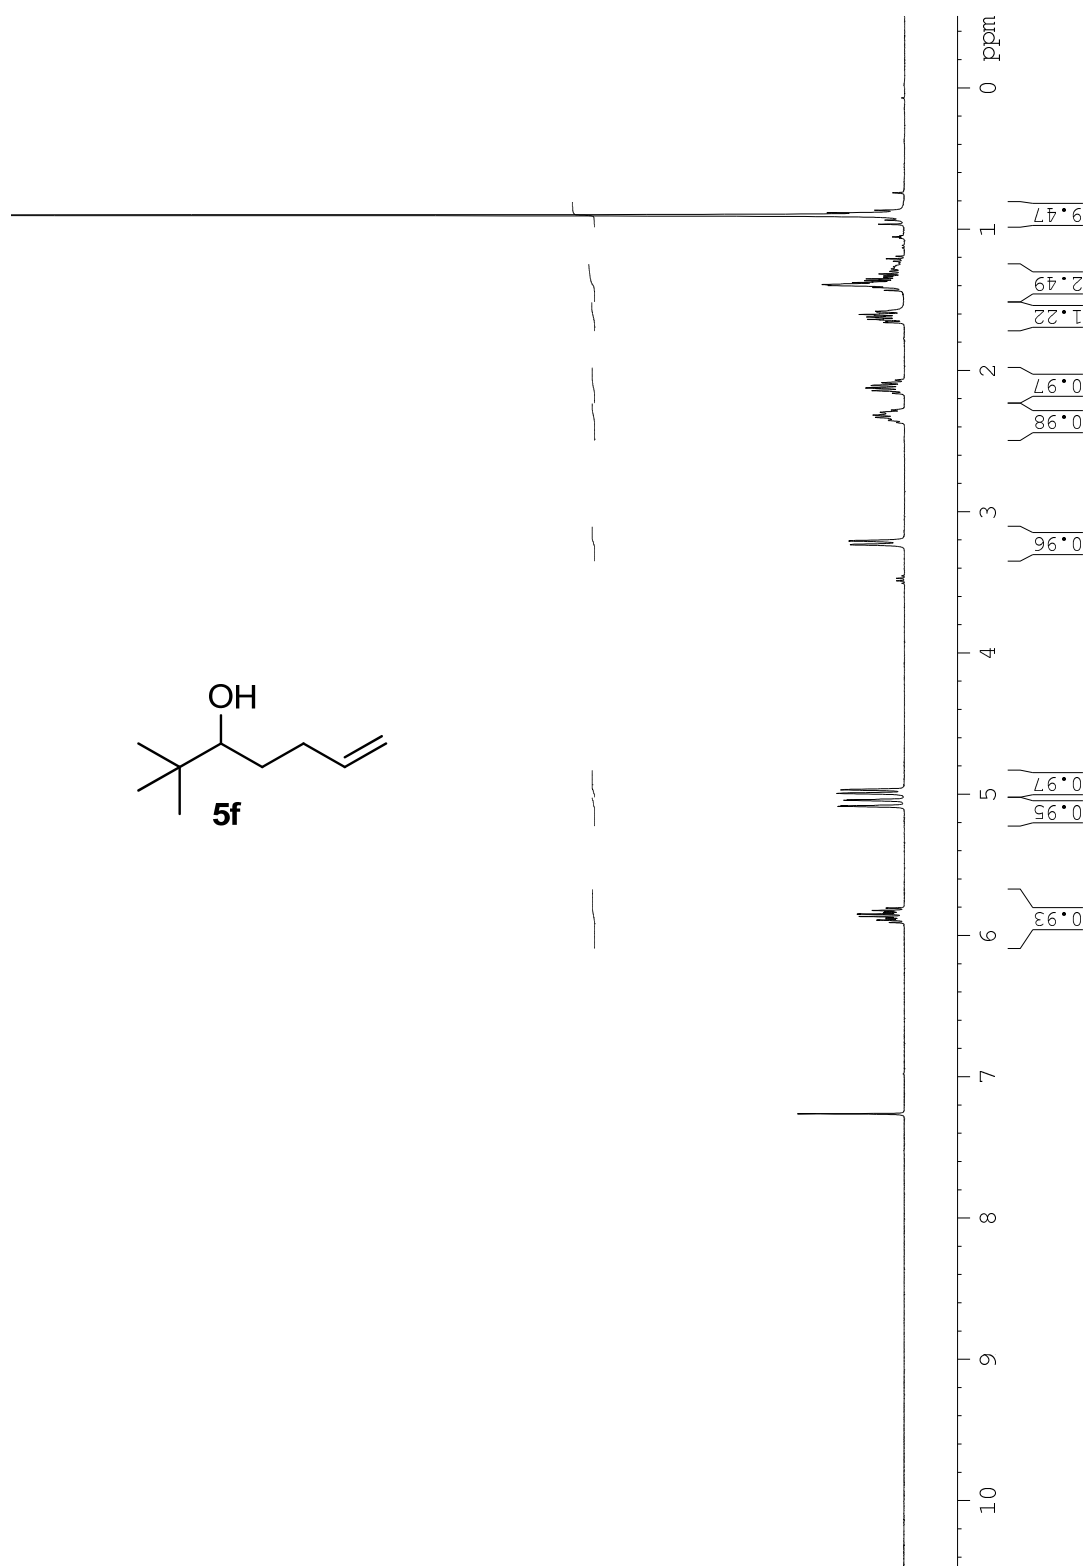

400 MHz  $^1\text{H}$  NMR spectrum of **5g** ( $\text{CDCl}_3$ )

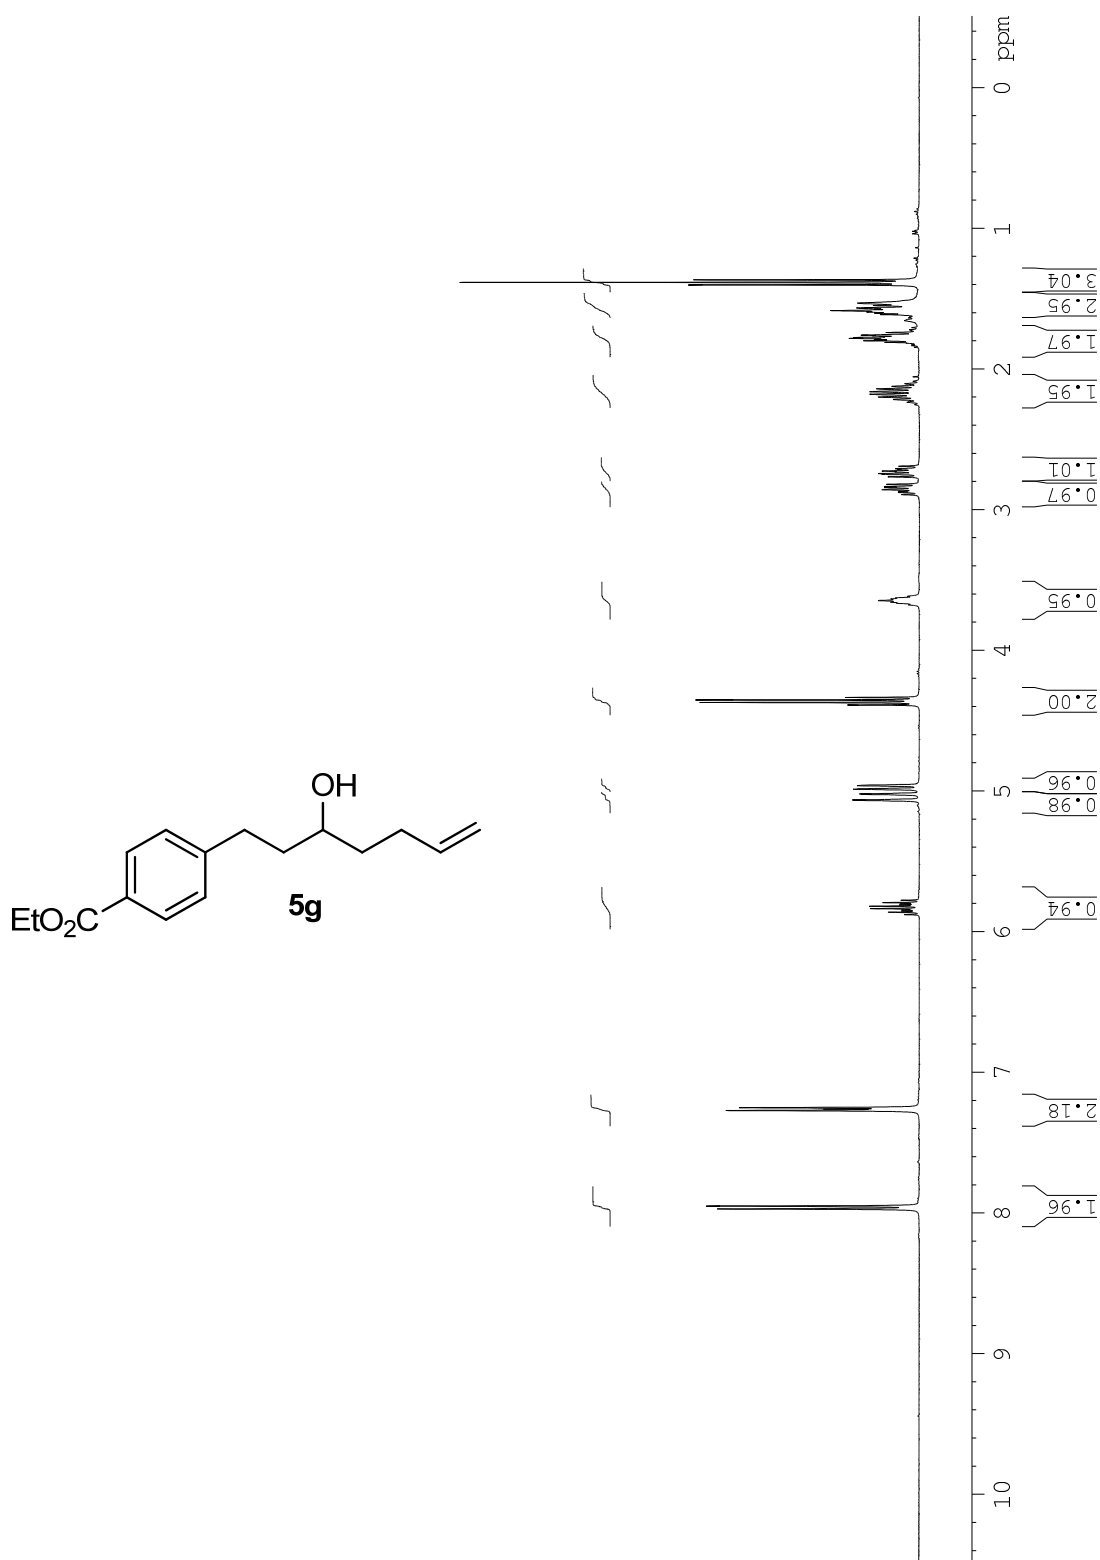



400 MHz  $^1\text{H}$  NMR spectrum of **5h** ( $\text{CDCl}_3$ )

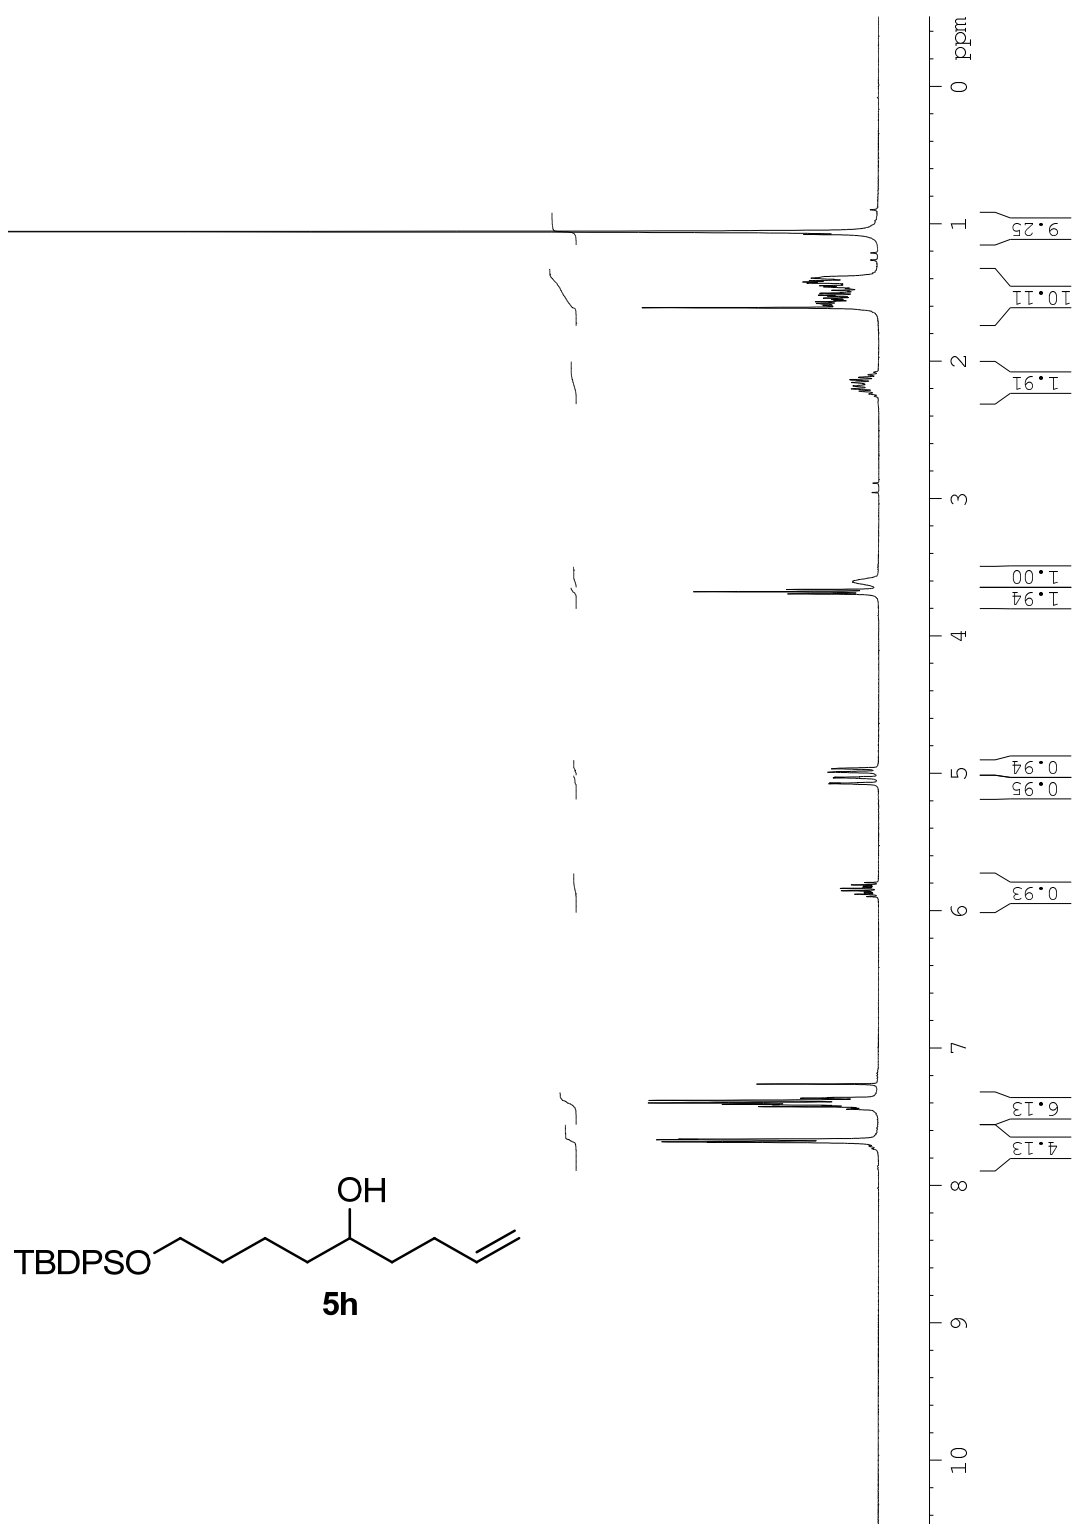

400 MHz  $^1\text{H}$  NMR spectrum of **6a** ( $\text{CDCl}_3$ )

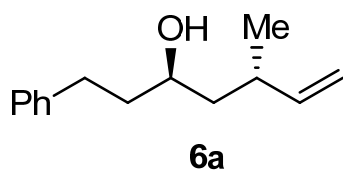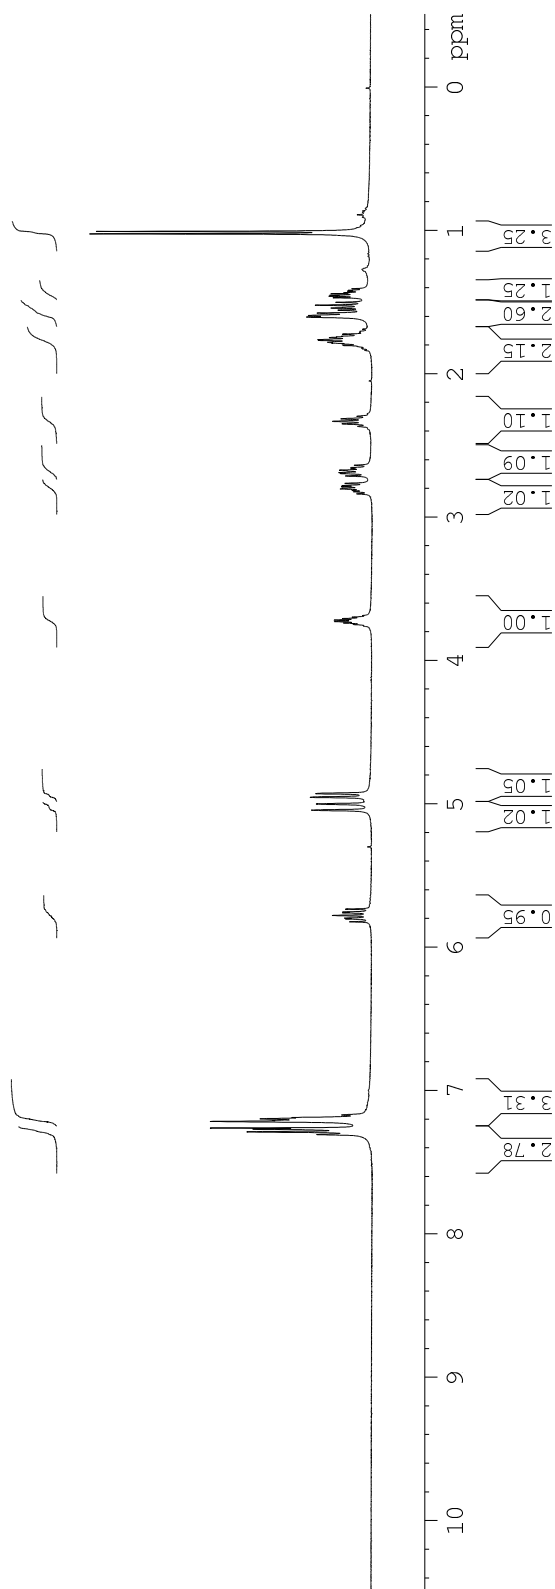

400 MHz  $^1\text{H}$  NMR spectrum of **6b** ( $\text{CDCl}_3$ )

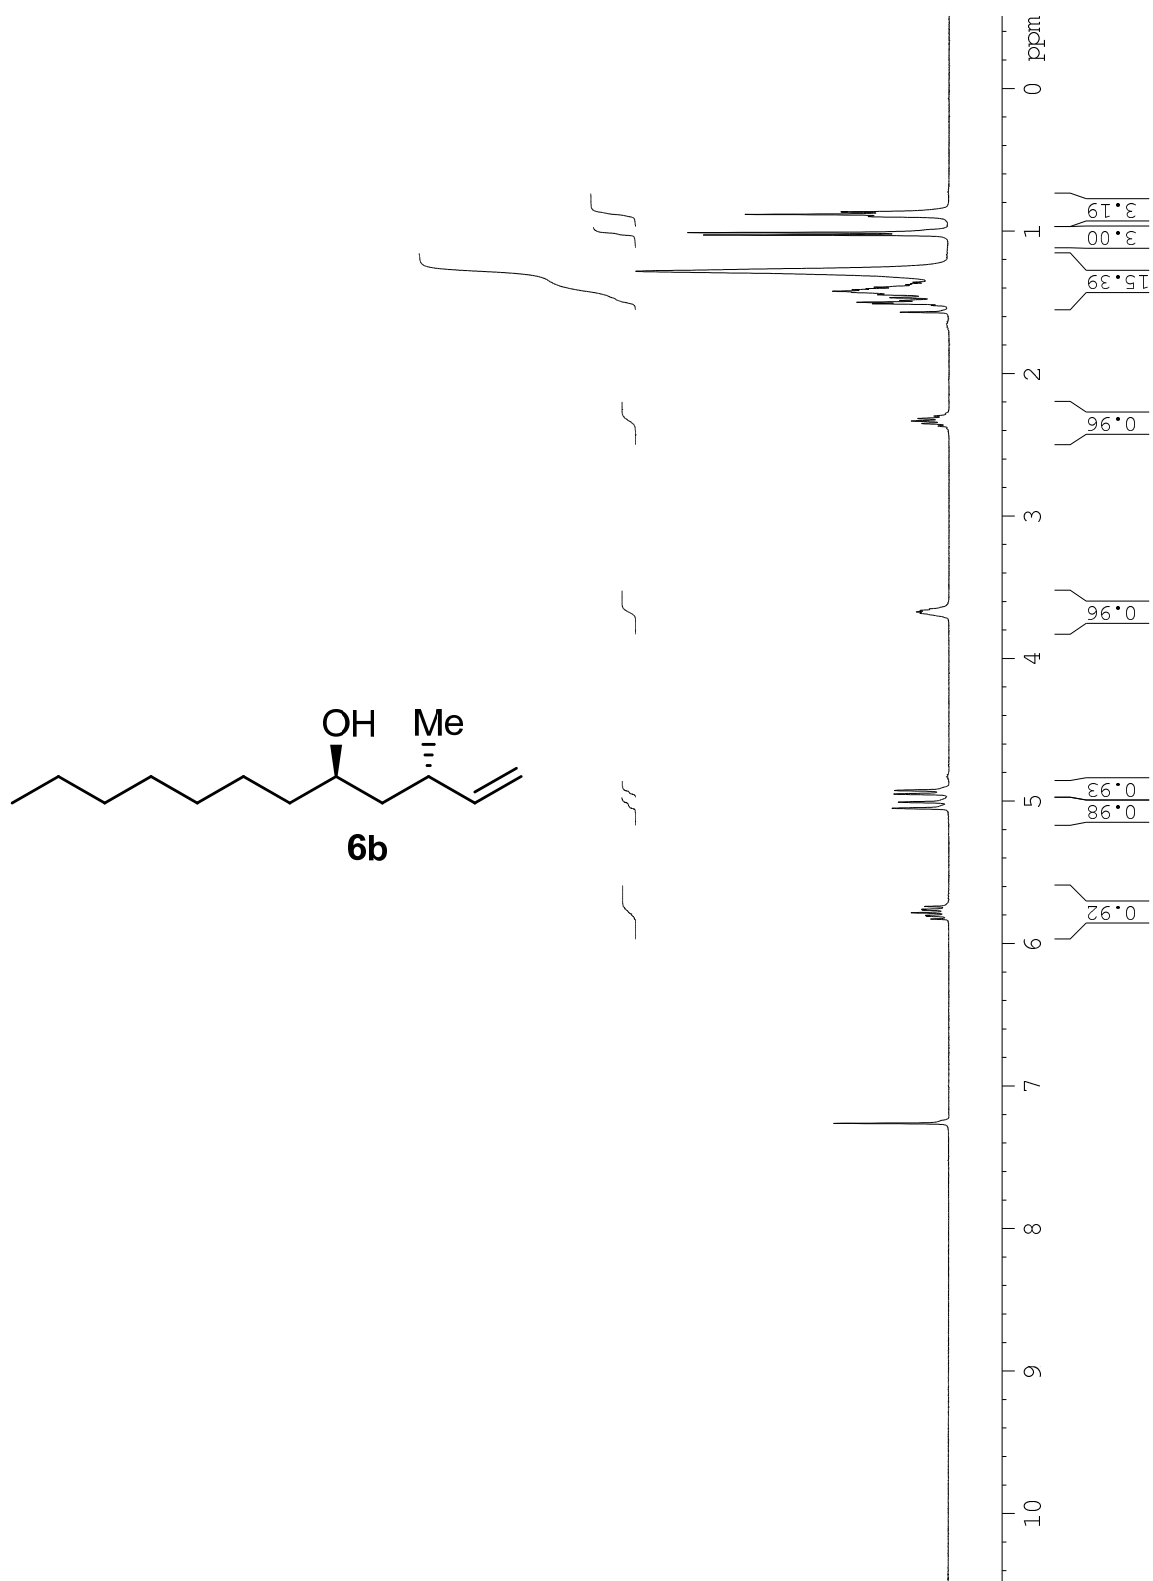

100 MHz  $^{13}\text{C}$  NMR spectrum of **6b** ( $\text{CDCl}_3$ )

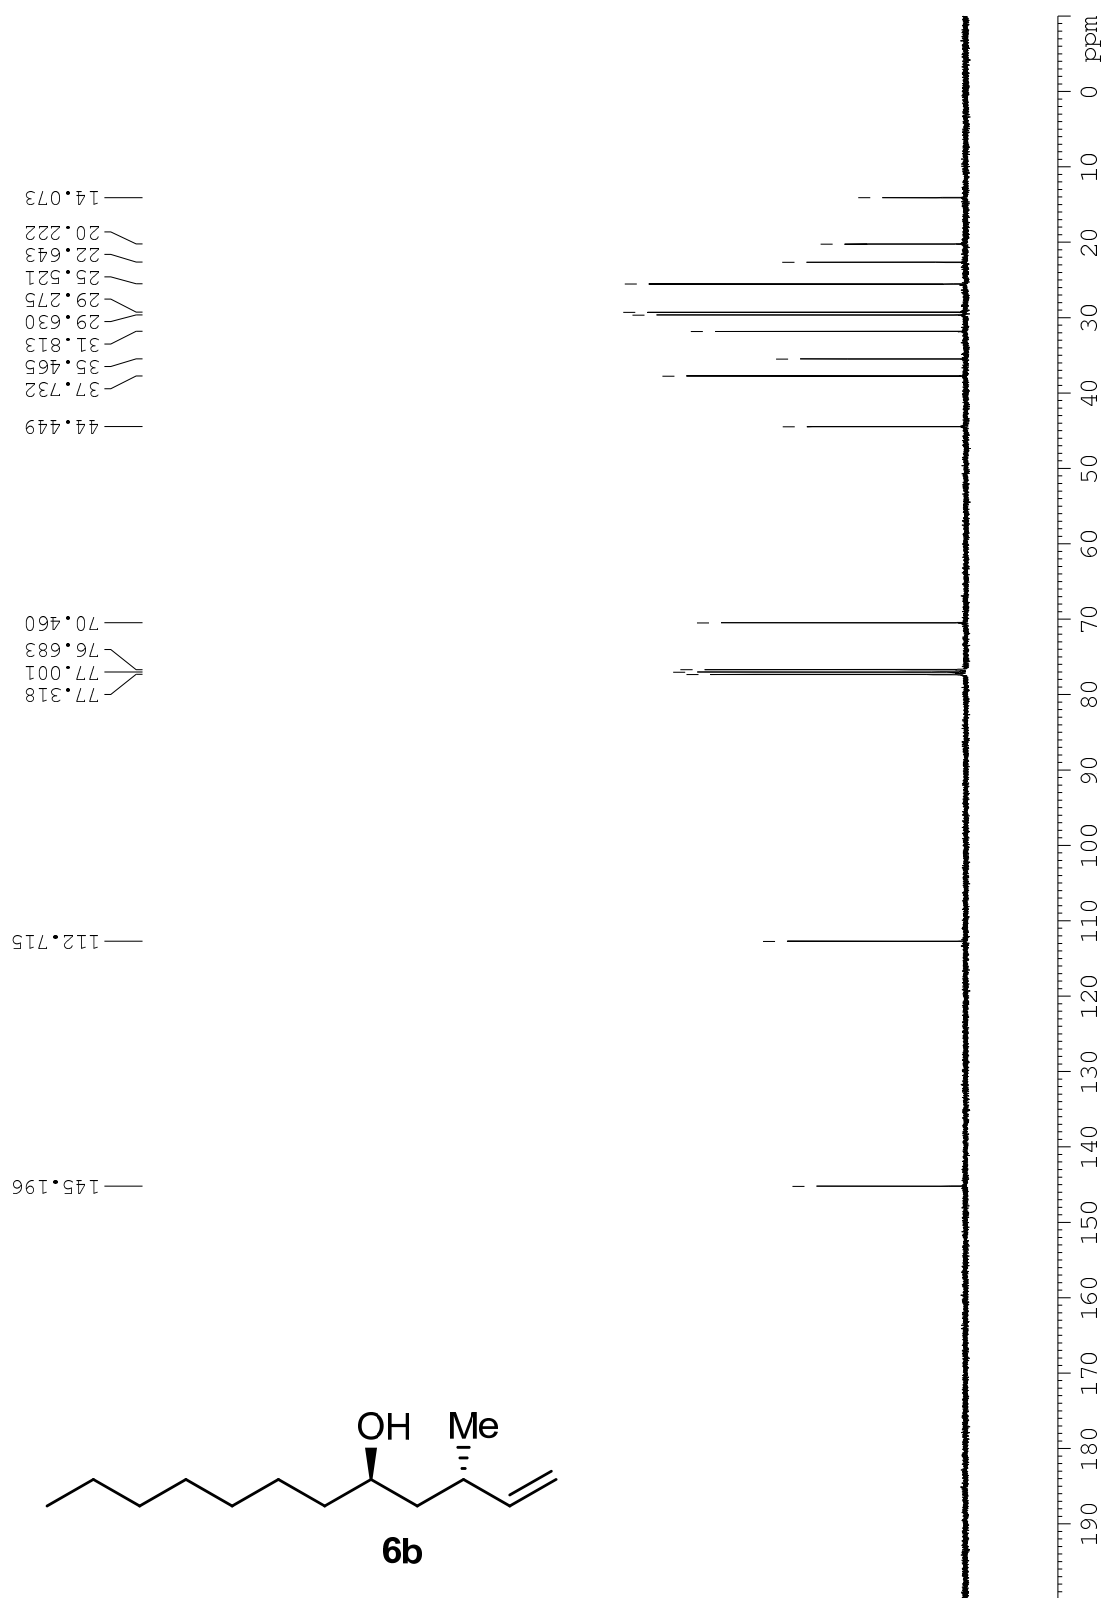

400 MHz  $^1\text{H}$  NMR spectrum of **6c** ( $\text{CDCl}_3$ )

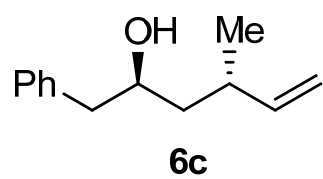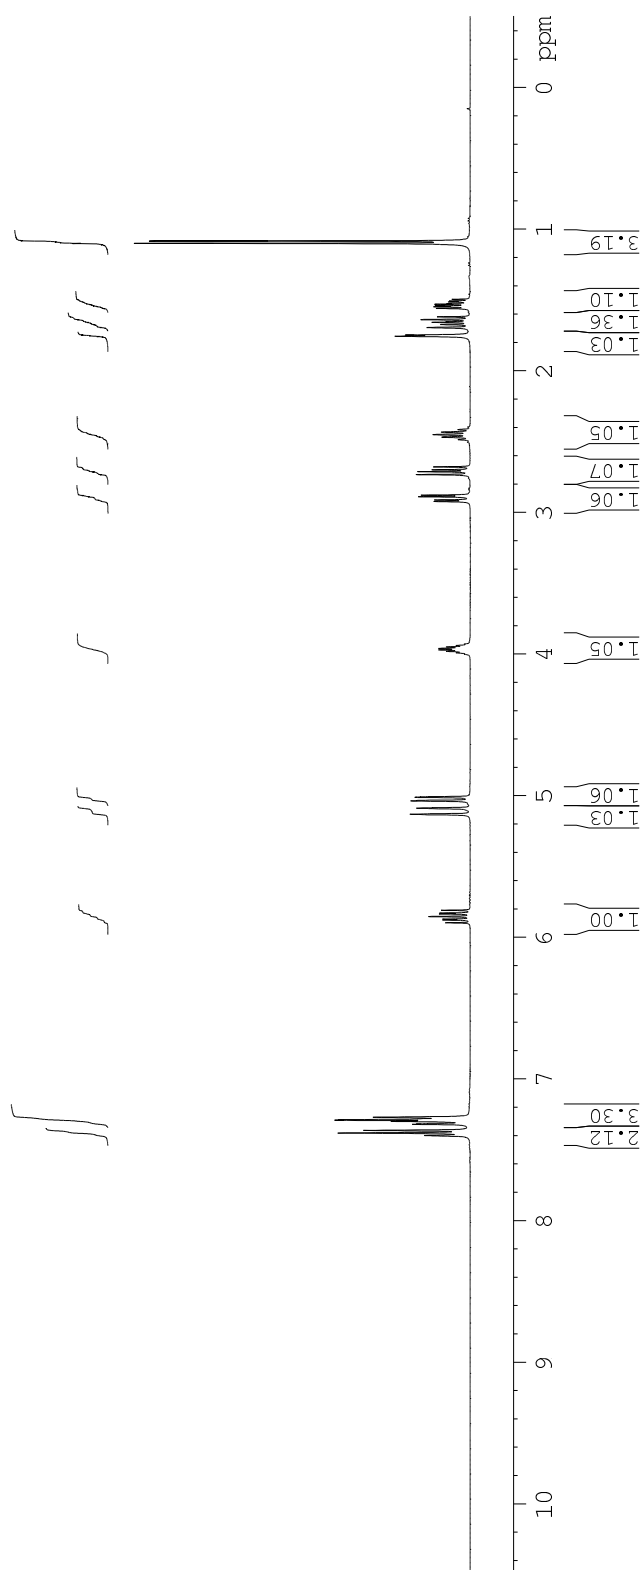

400 MHz  $^1\text{H}$  NMR spectrum of **6d** ( $\text{CDCl}_3$ )

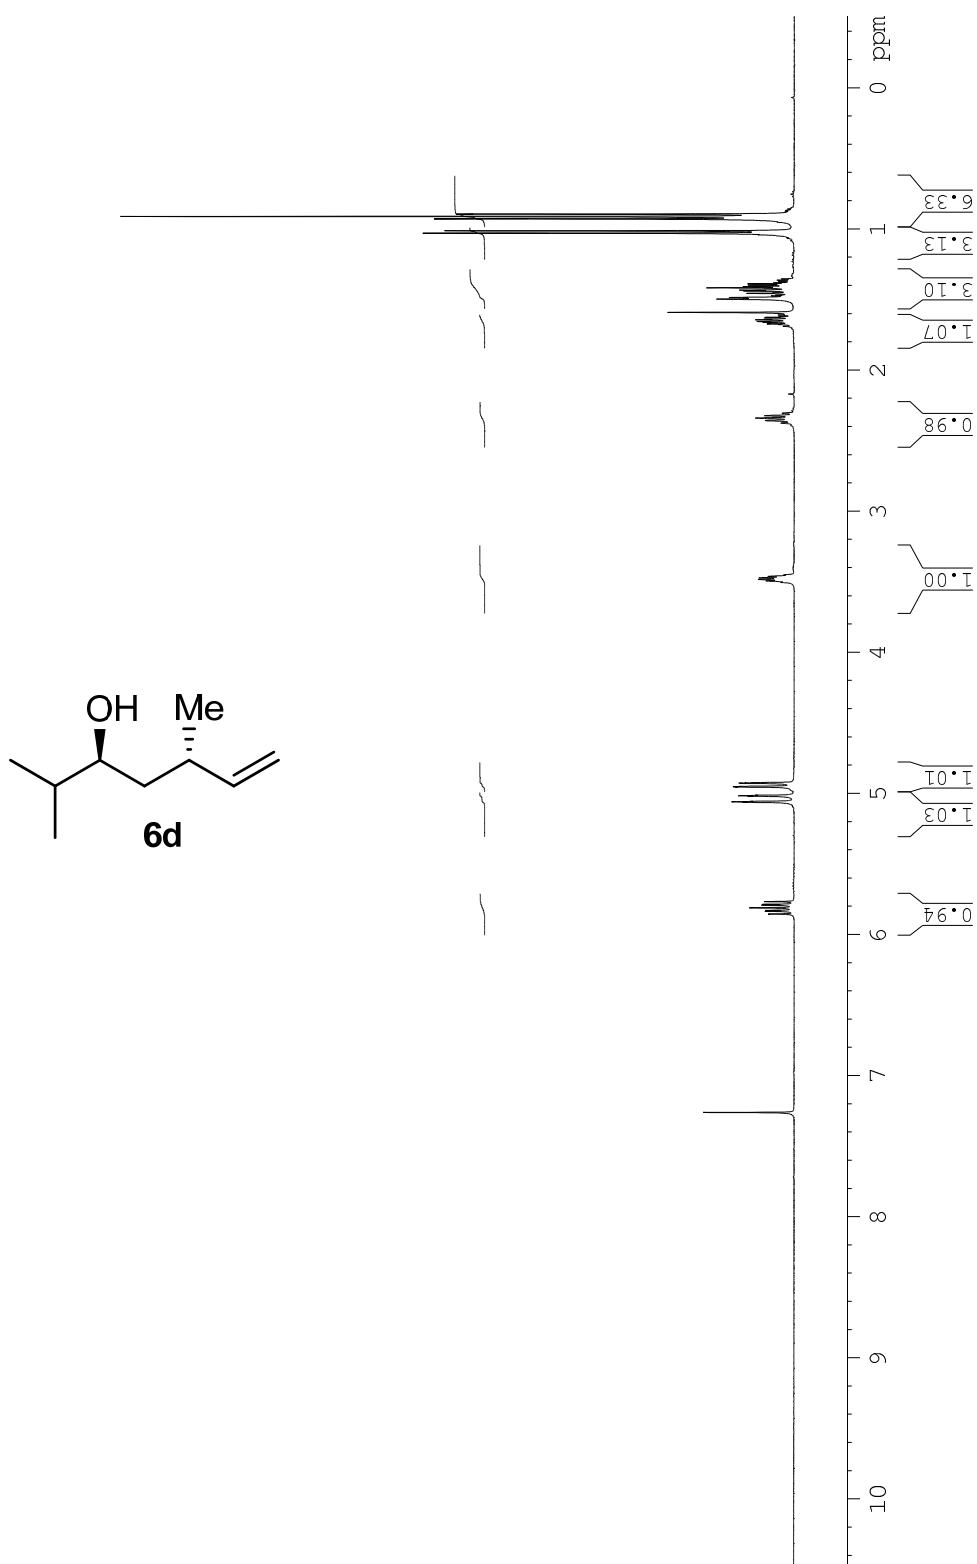

100 MHz  $^{13}\text{C}$  NMR spectrum of **6d** ( $\text{CDCl}_3$ )

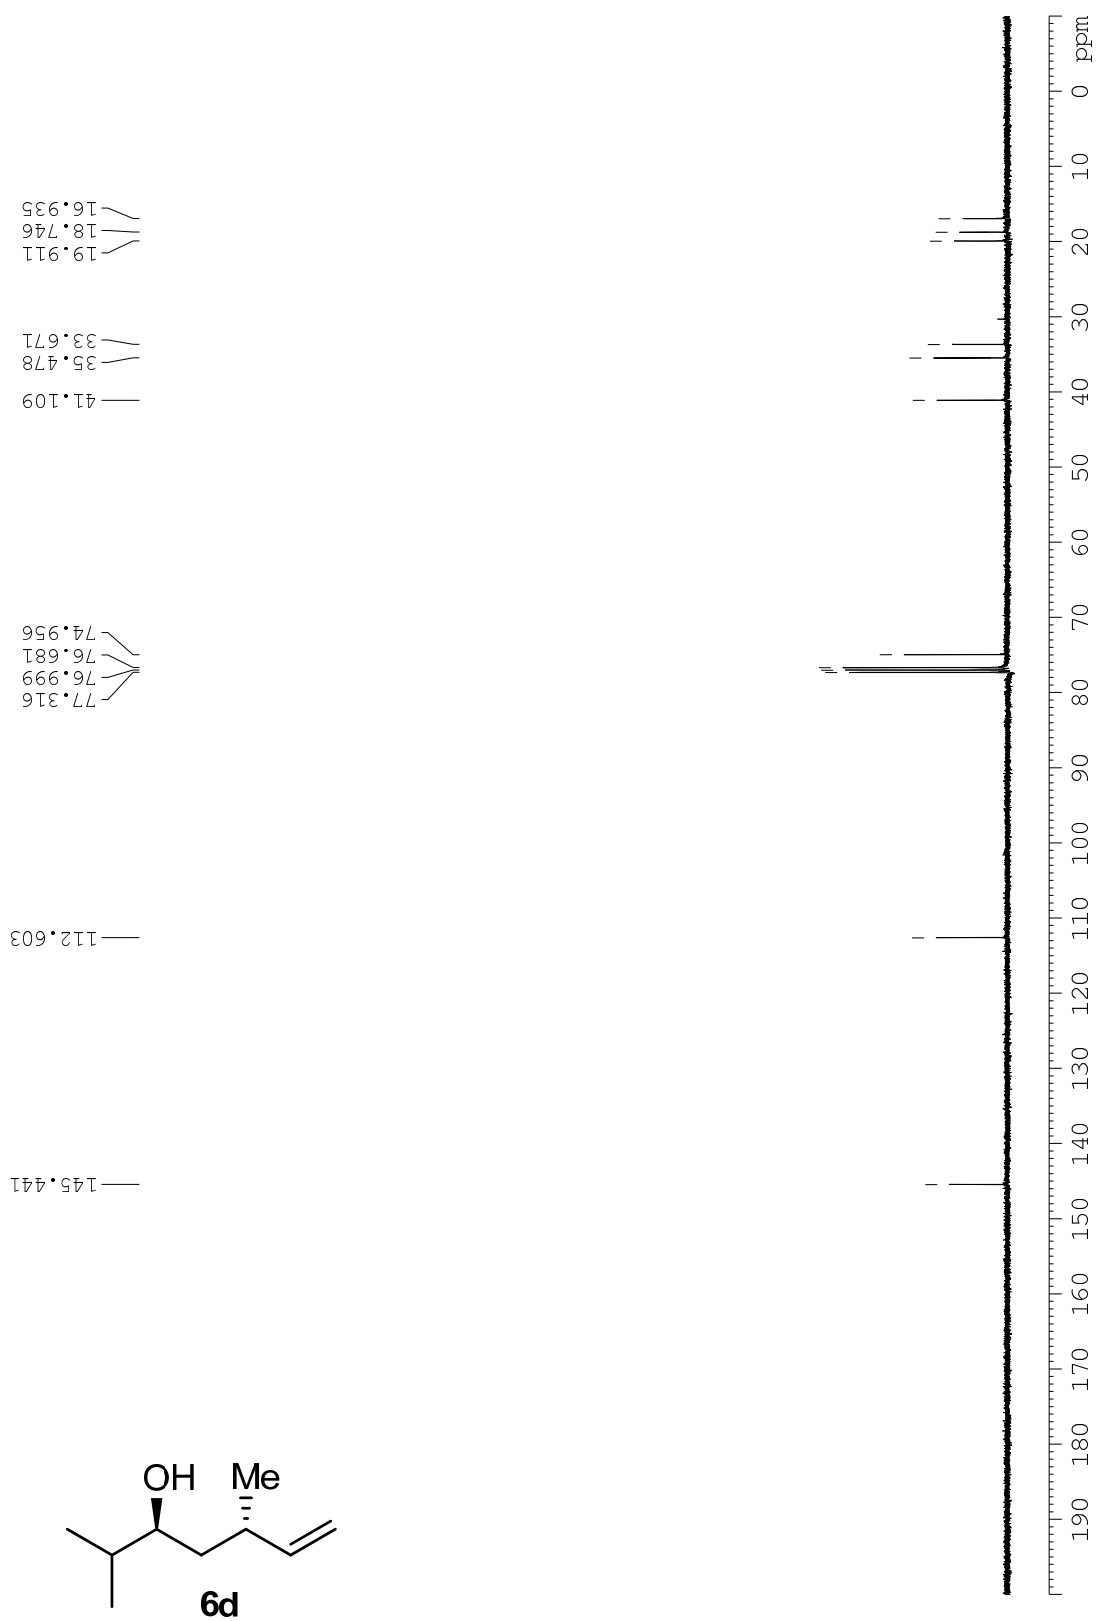

400 MHz  $^1\text{H}$  NMR spectrum of **6e** ( $\text{CDCl}_3$ )

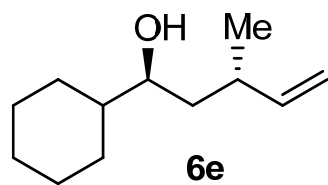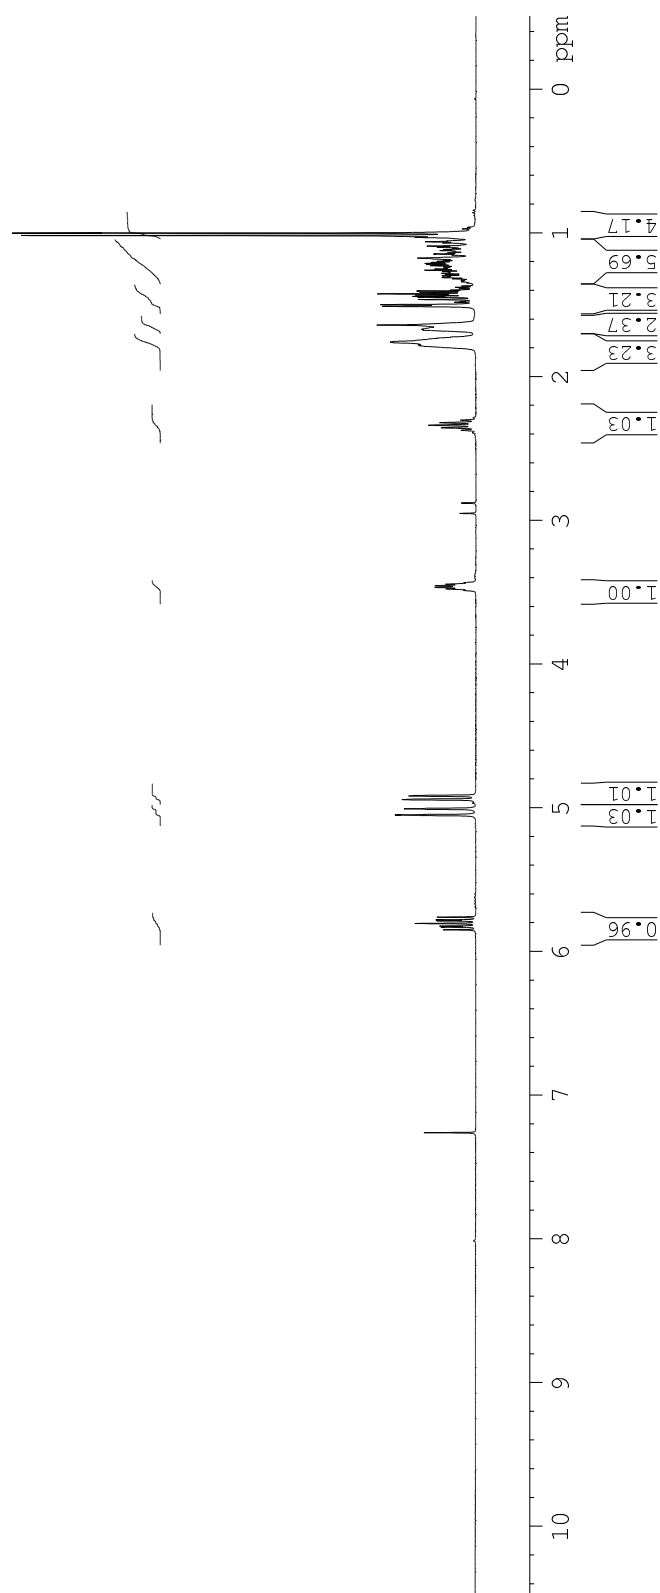



400 MHz  $^1\text{H}$  NMR spectrum of **6f** ( $\text{CDCl}_3$ )

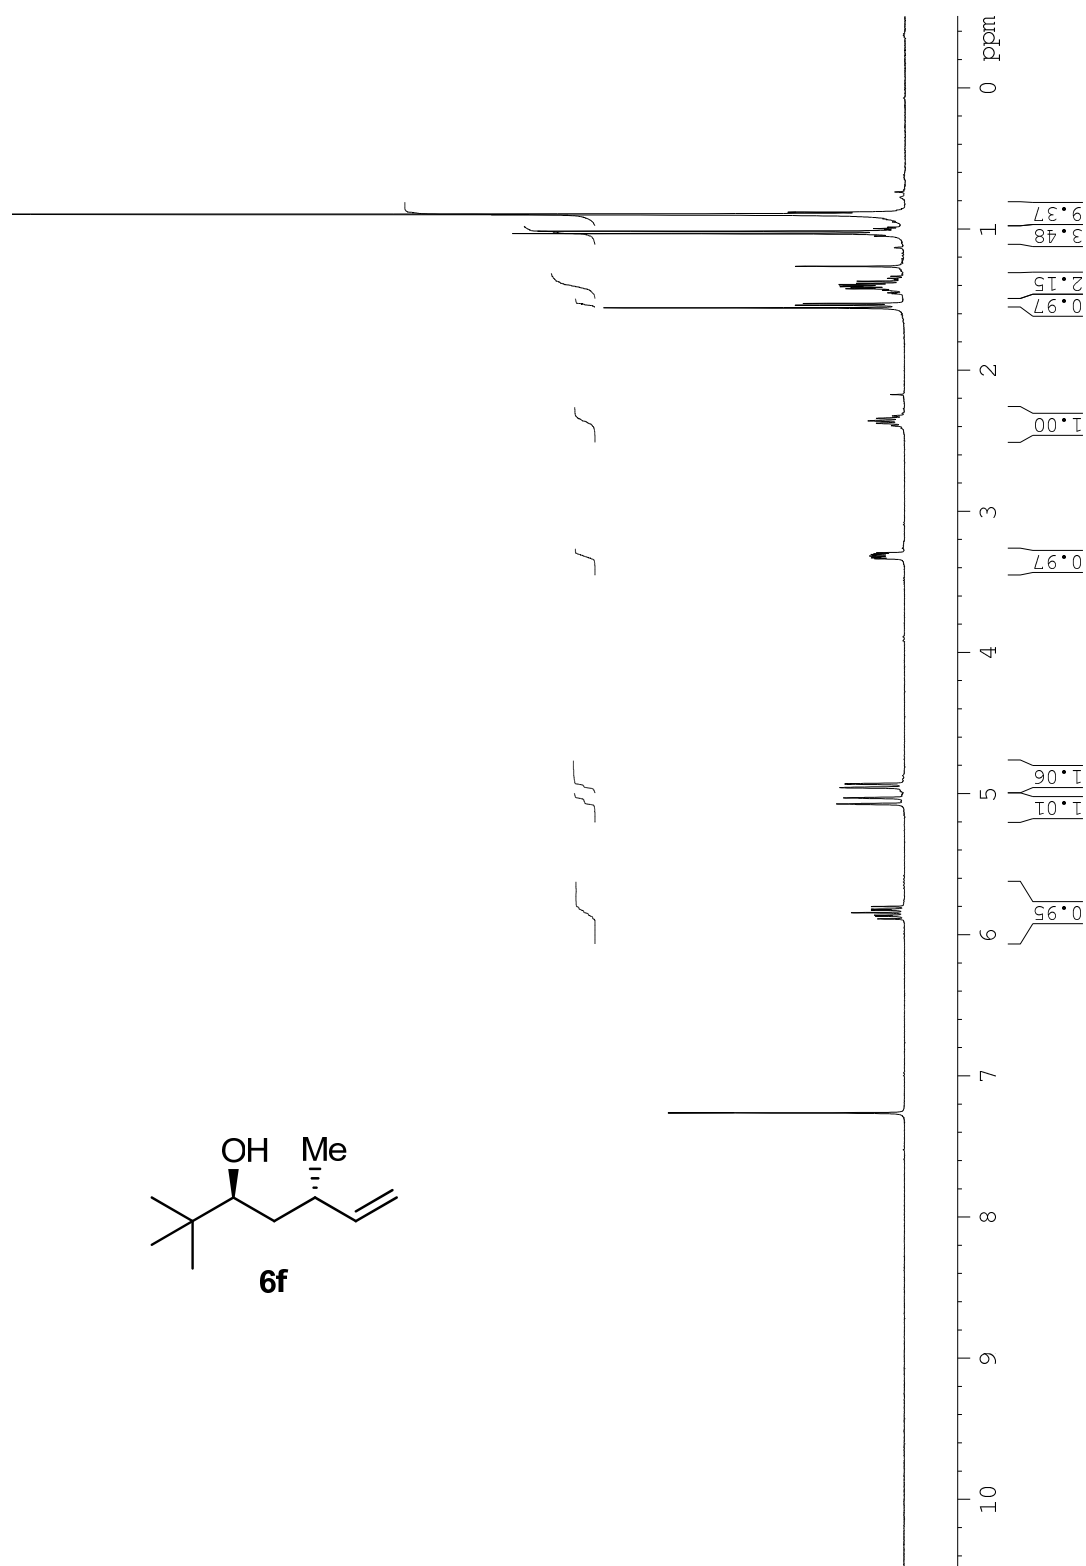

400 MHz  $^1\text{H}$  NMR spectrum of **6g** ( $\text{CDCl}_3$ )

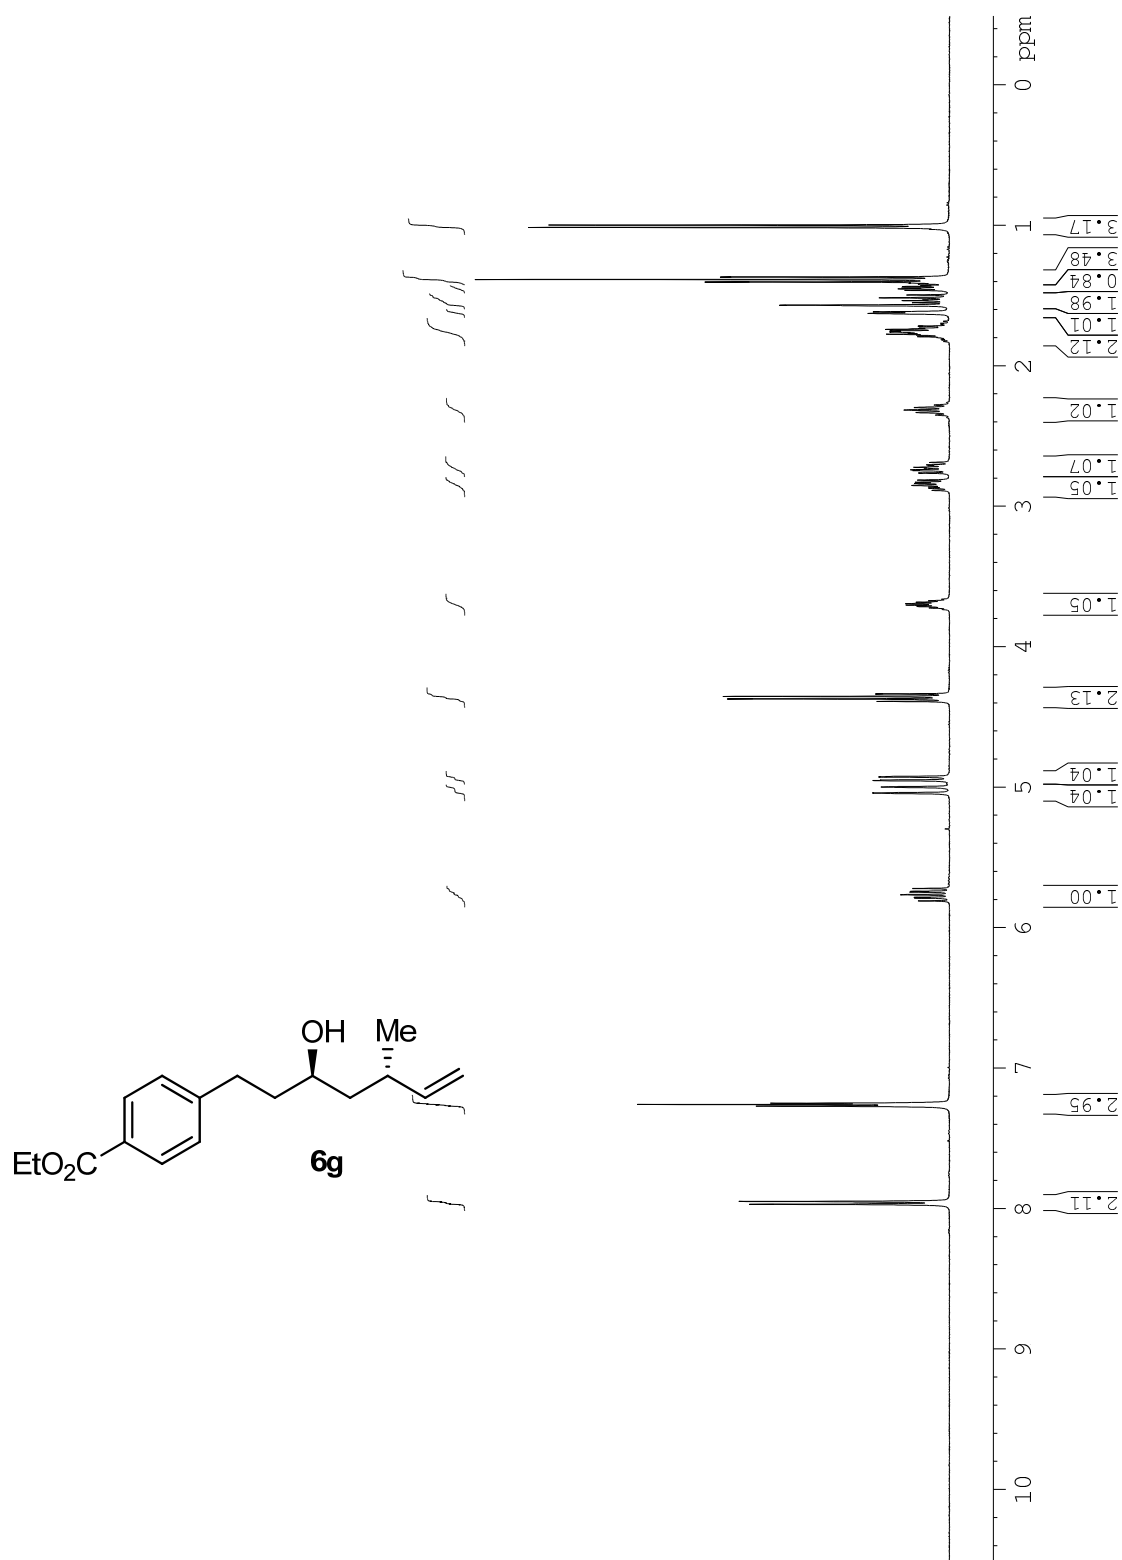

100 MHz  $^{13}\text{C}$  NMR spectrum of **6g** ( $\text{CDCl}_3$ )

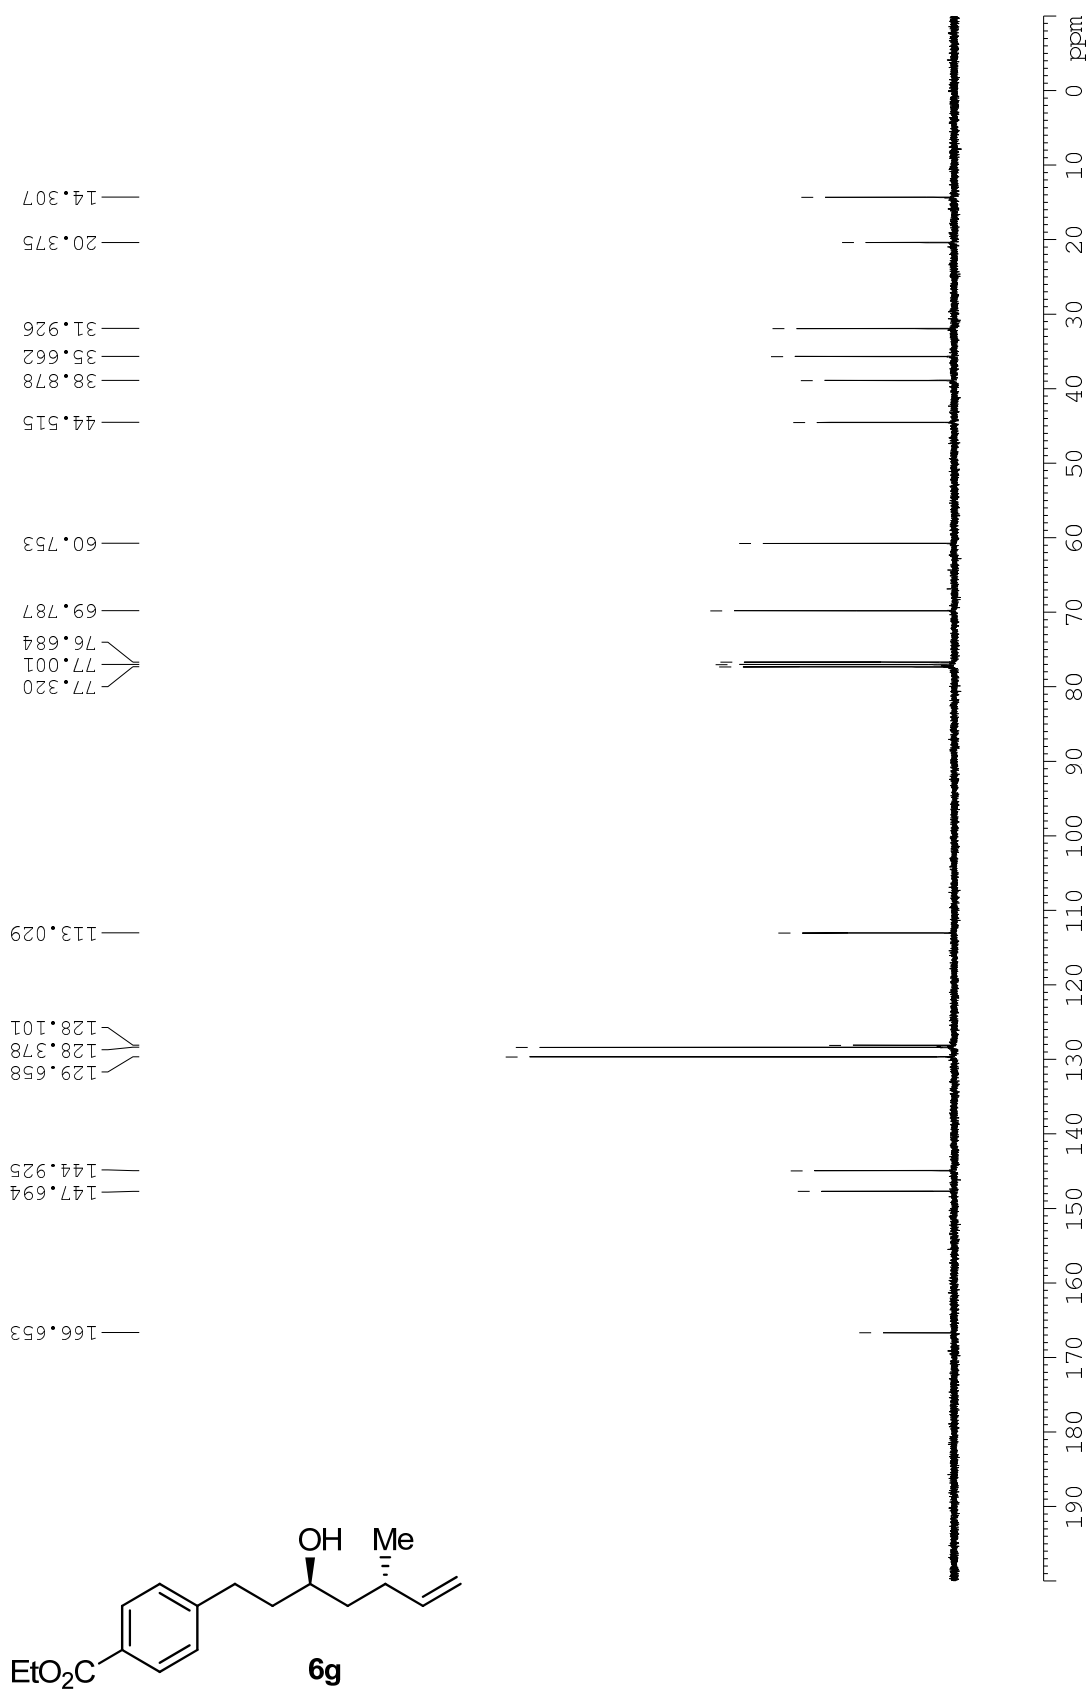

400 MHz  $^1\text{H}$  NMR spectrum of **6h** ( $\text{CDCl}_3$ )

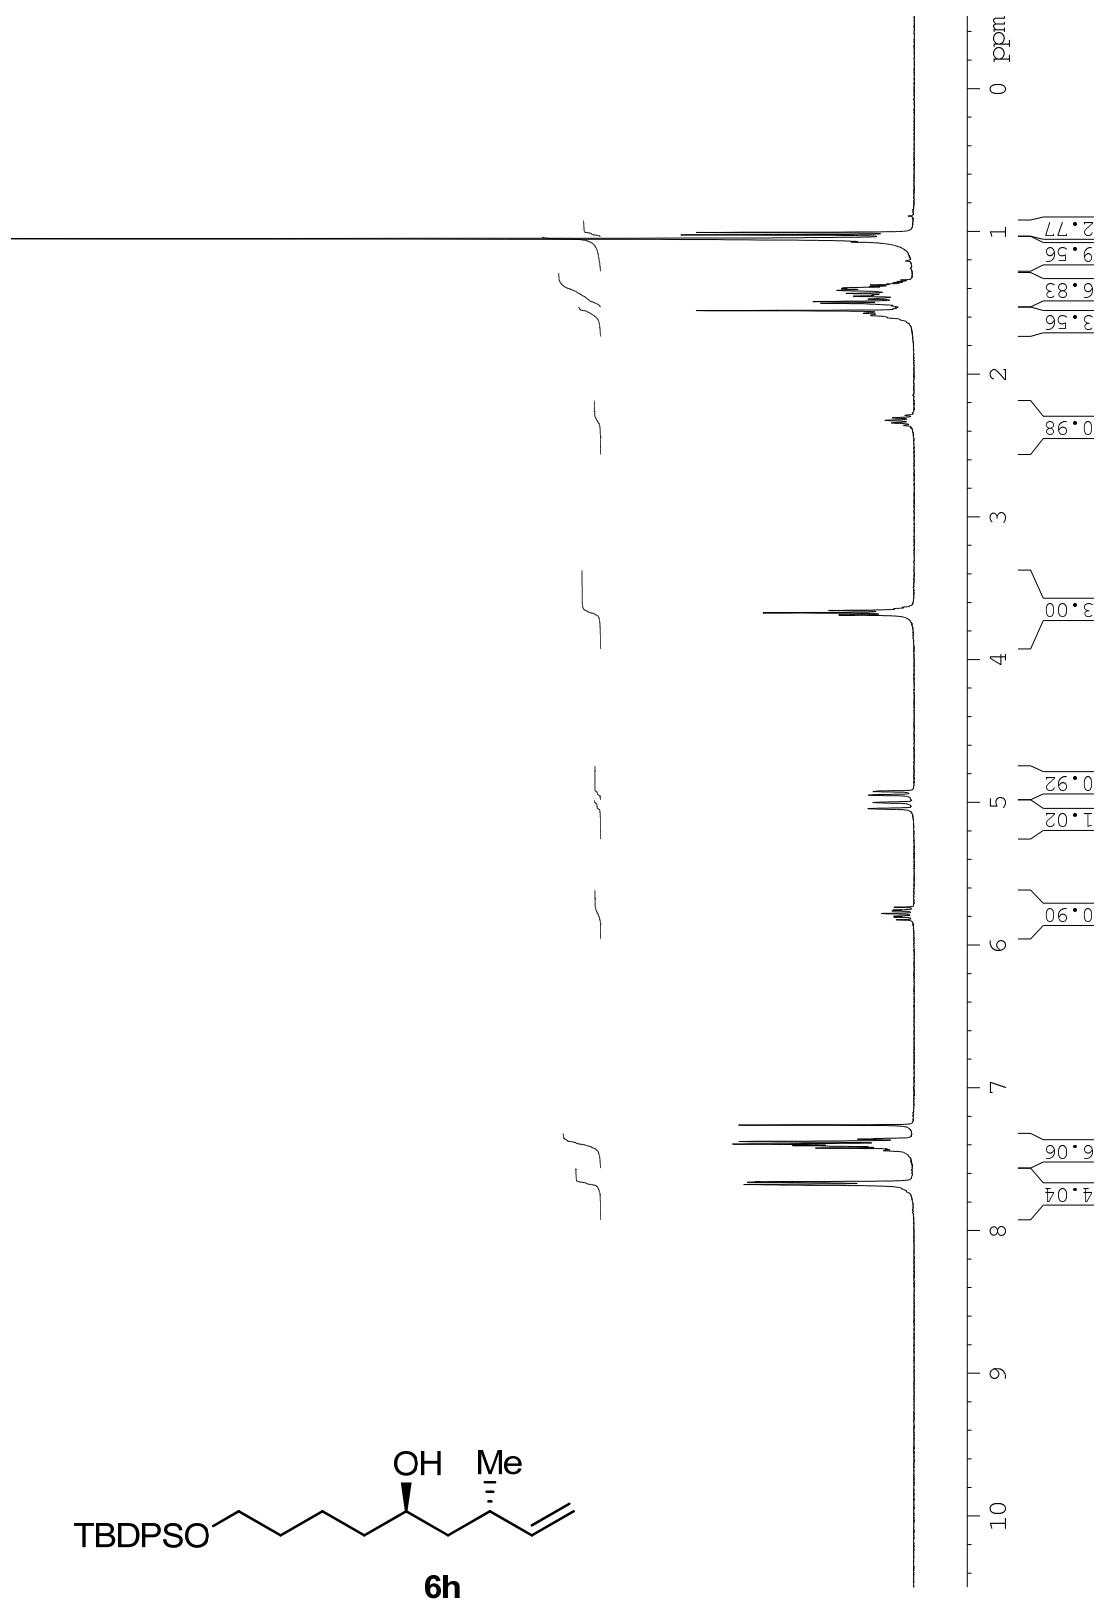

100 MHz  $^{13}\text{C}$  NMR spectrum of **6h** ( $\text{CDCl}_3$ )

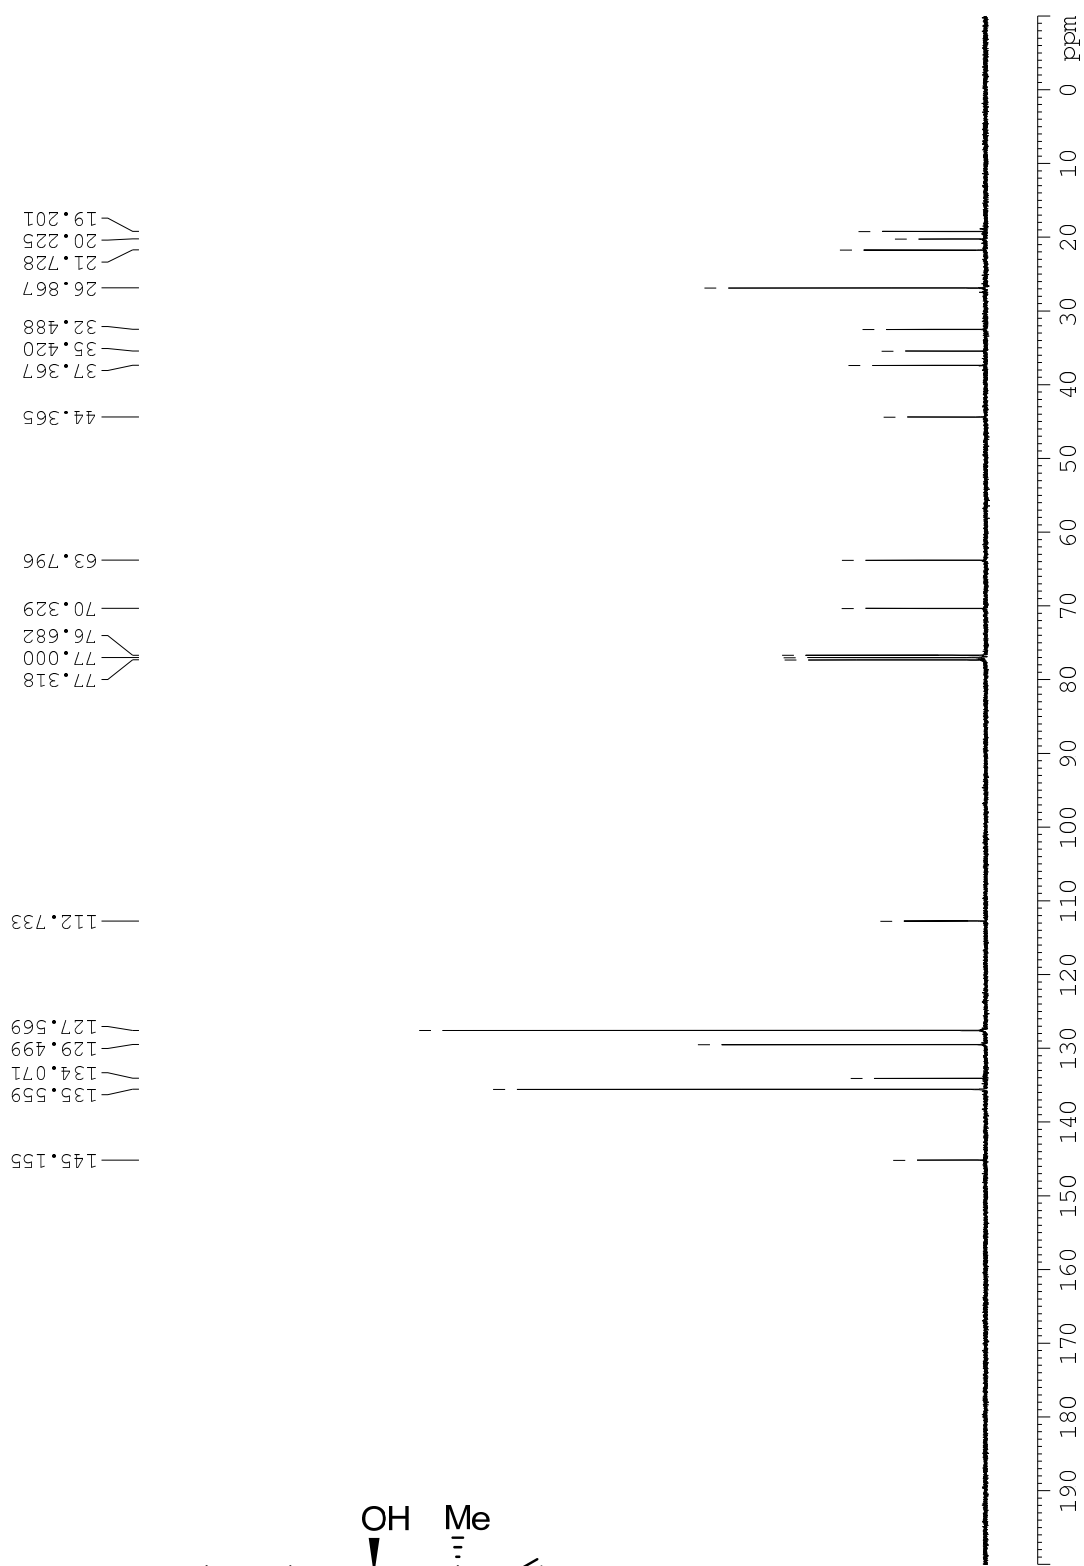

400 MHz  $^1\text{H}$  NMR spectrum of **6i** ( $\text{CDCl}_3$ )

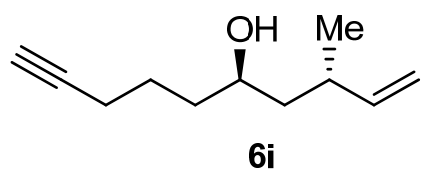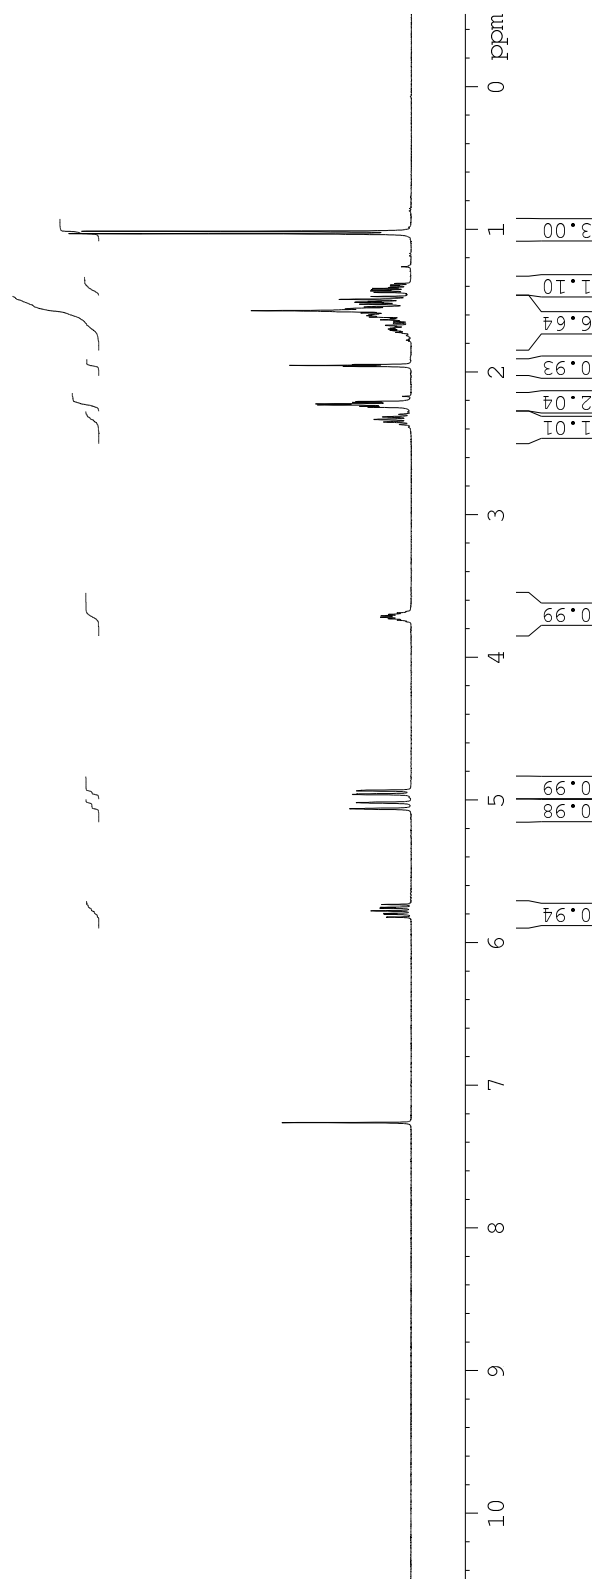

100 MHz  $^{13}\text{C}$  NMR spectrum of **6i** ( $\text{CDCl}_3$ )

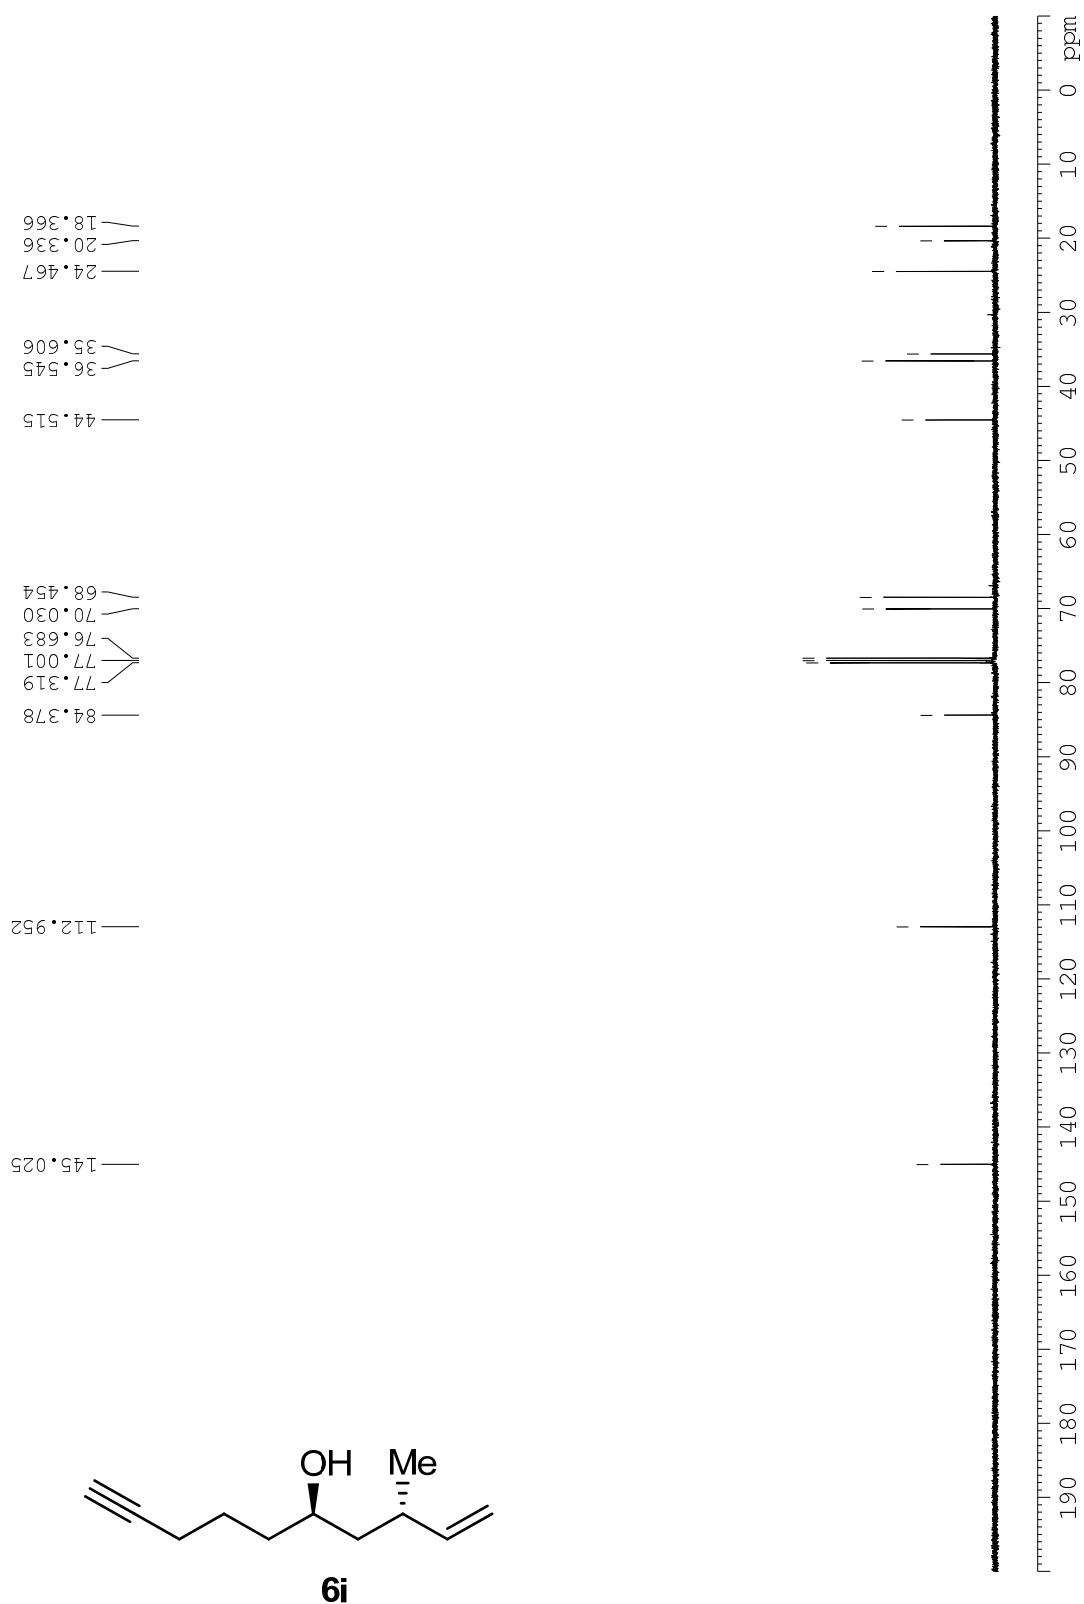

400 MHz  $^1\text{H}$  NMR spectrum of **6j** ( $\text{CDCl}_3$ )

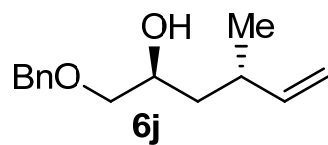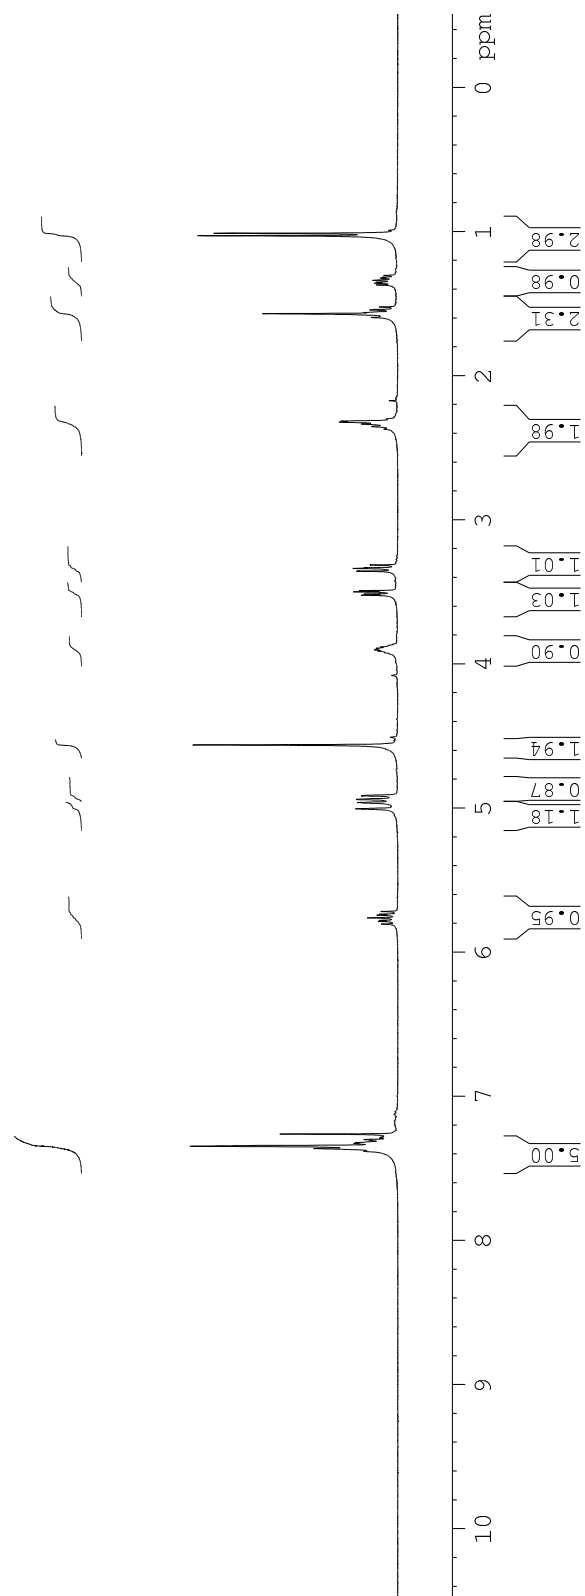



100 MHz  $^{13}\text{C}$  NMR spectrum of **6j** ( $\text{CDCl}_3$ )

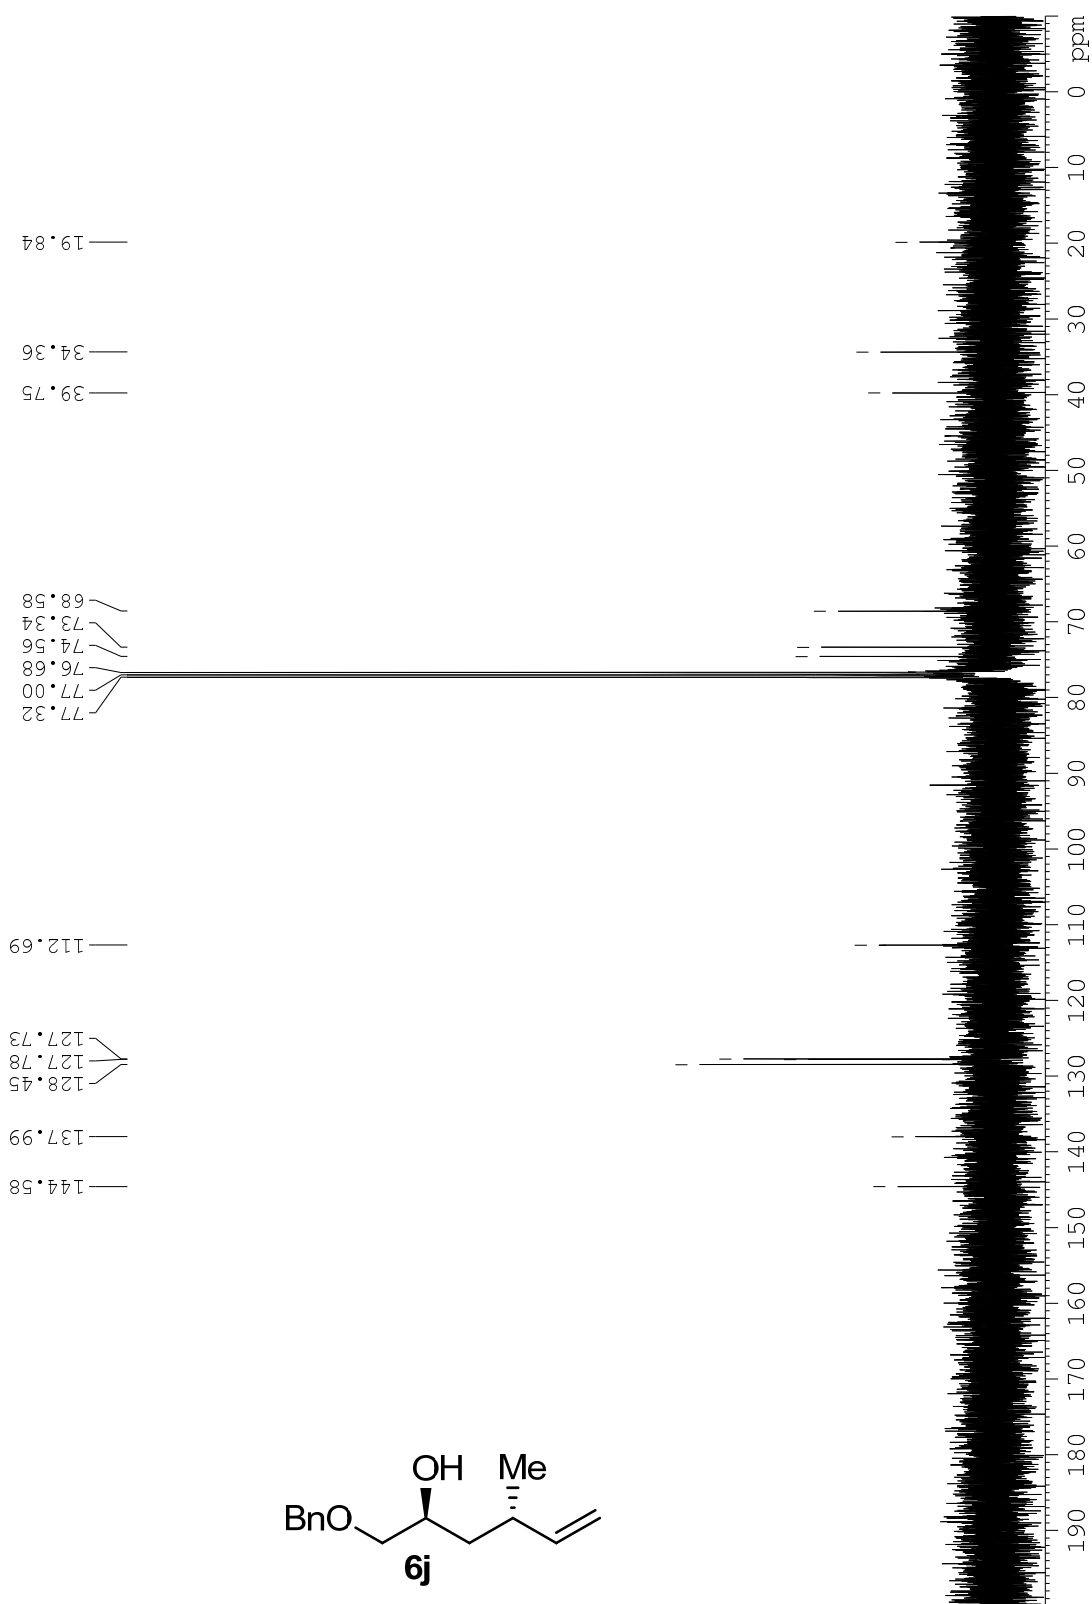

400 MHz  $^1\text{H}$  NMR spectrum of **6k** ( $\text{CDCl}_3$ )

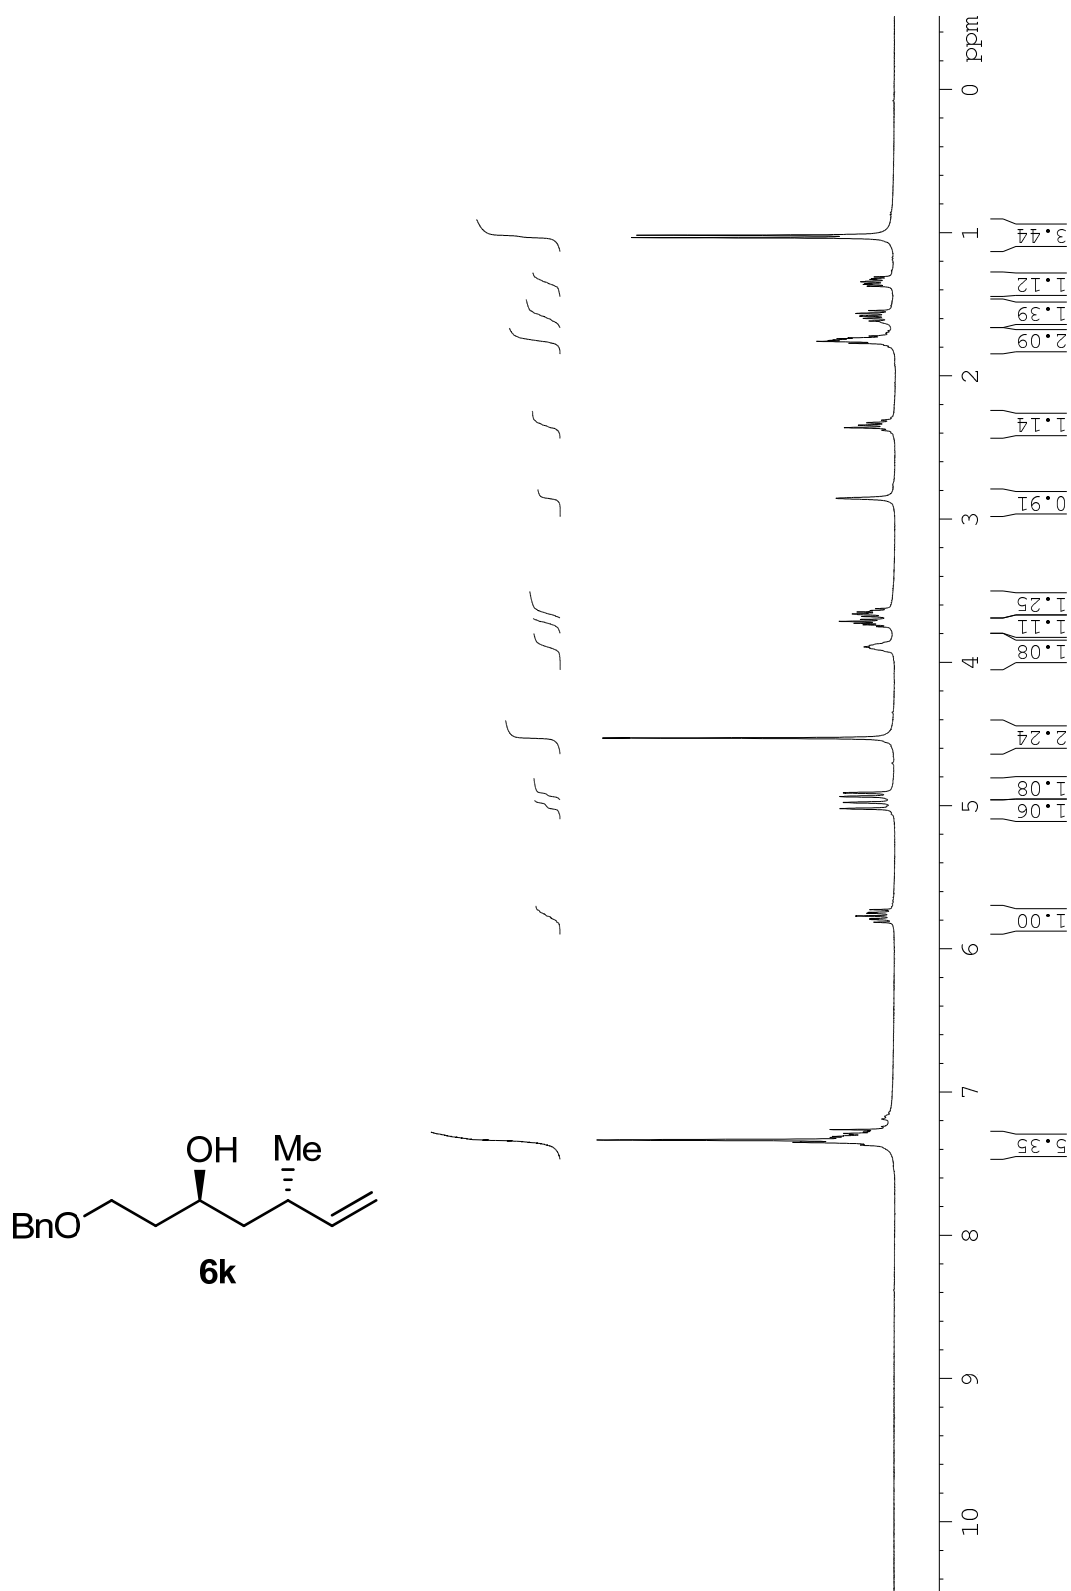

100 MHz  $^{13}\text{C}$  NMR spectrum of **6k** ( $\text{CDCl}_3$ )

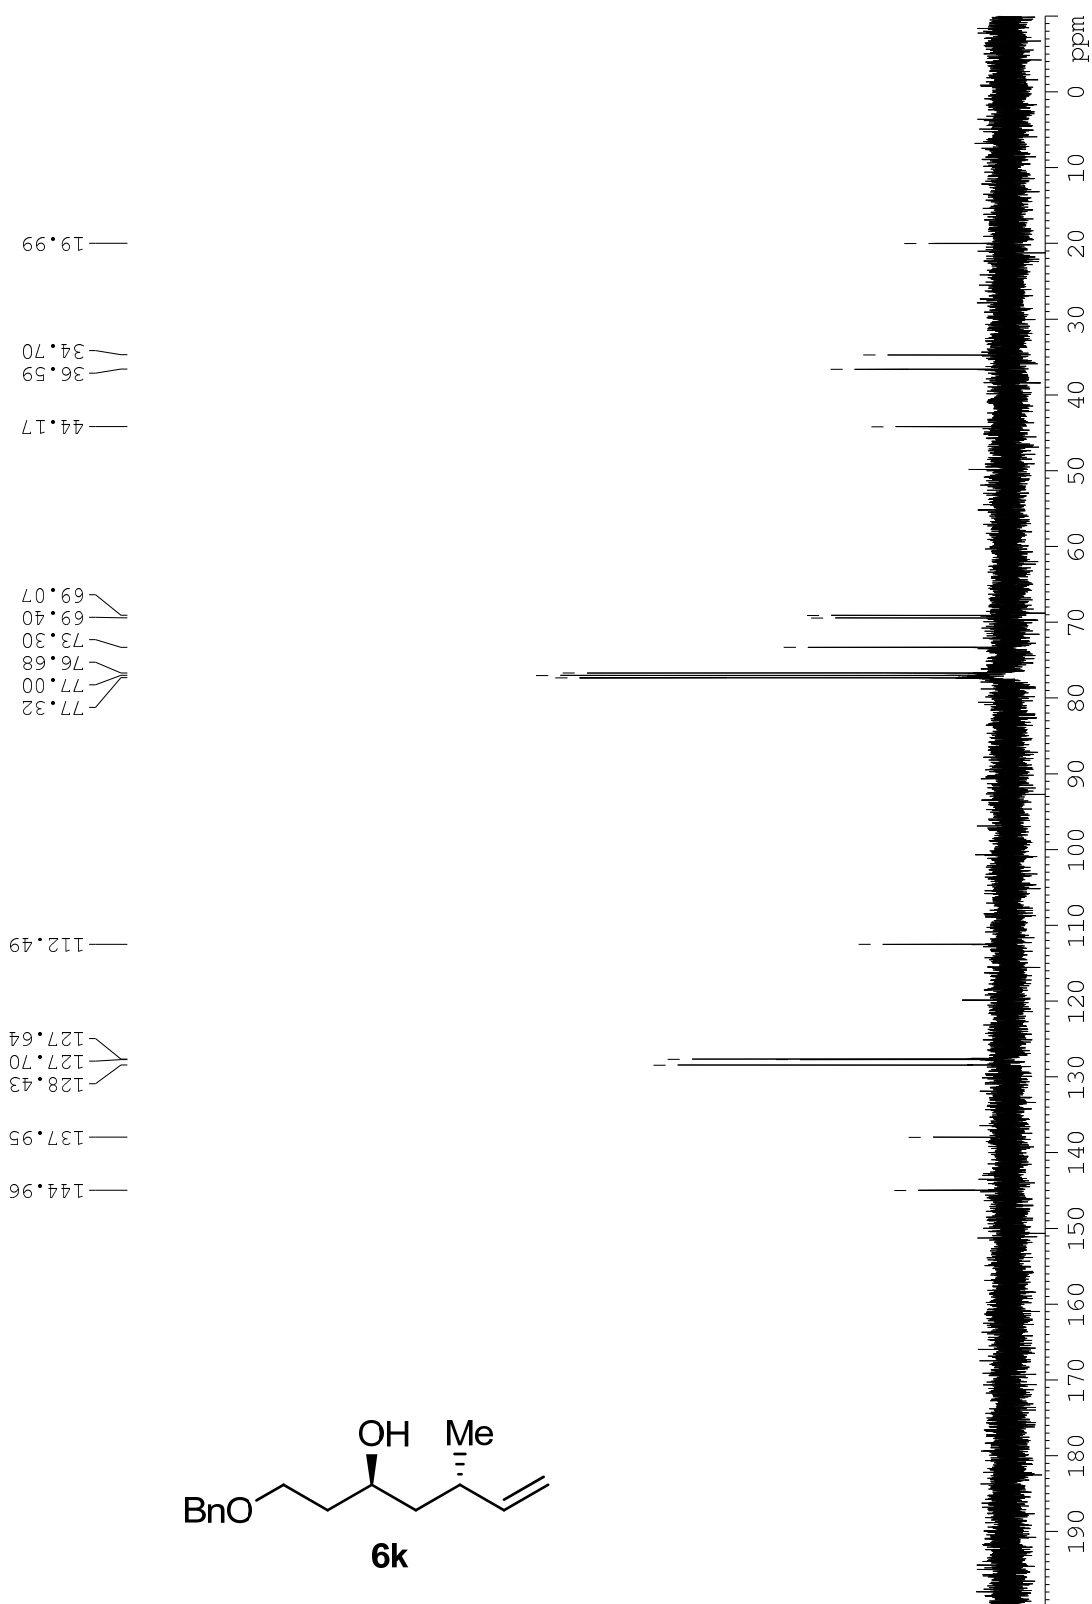

400 MHz  $^1\text{H}$  NMR spectrum of **7a** ( $\text{CDCl}_3$ )

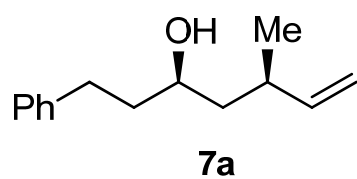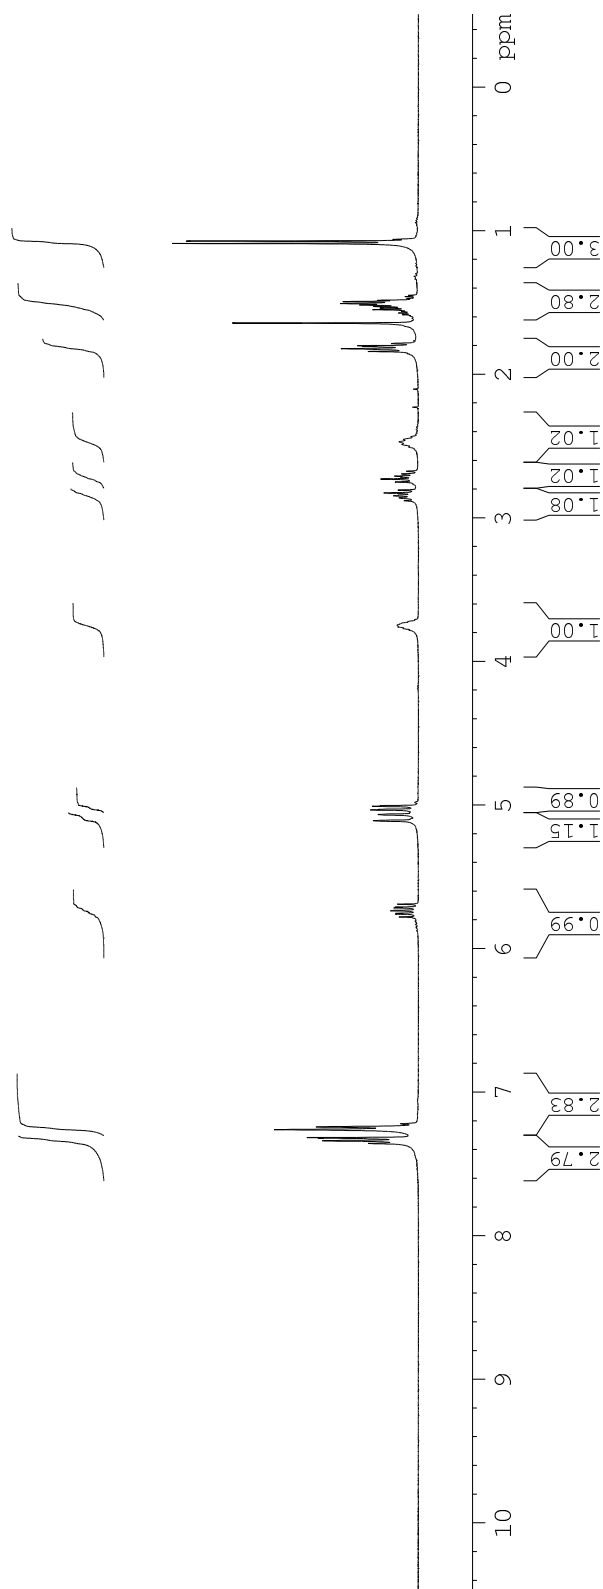

400 MHz  $^1\text{H}$  NMR spectrum of **7b** ( $\text{CDCl}_3$ )

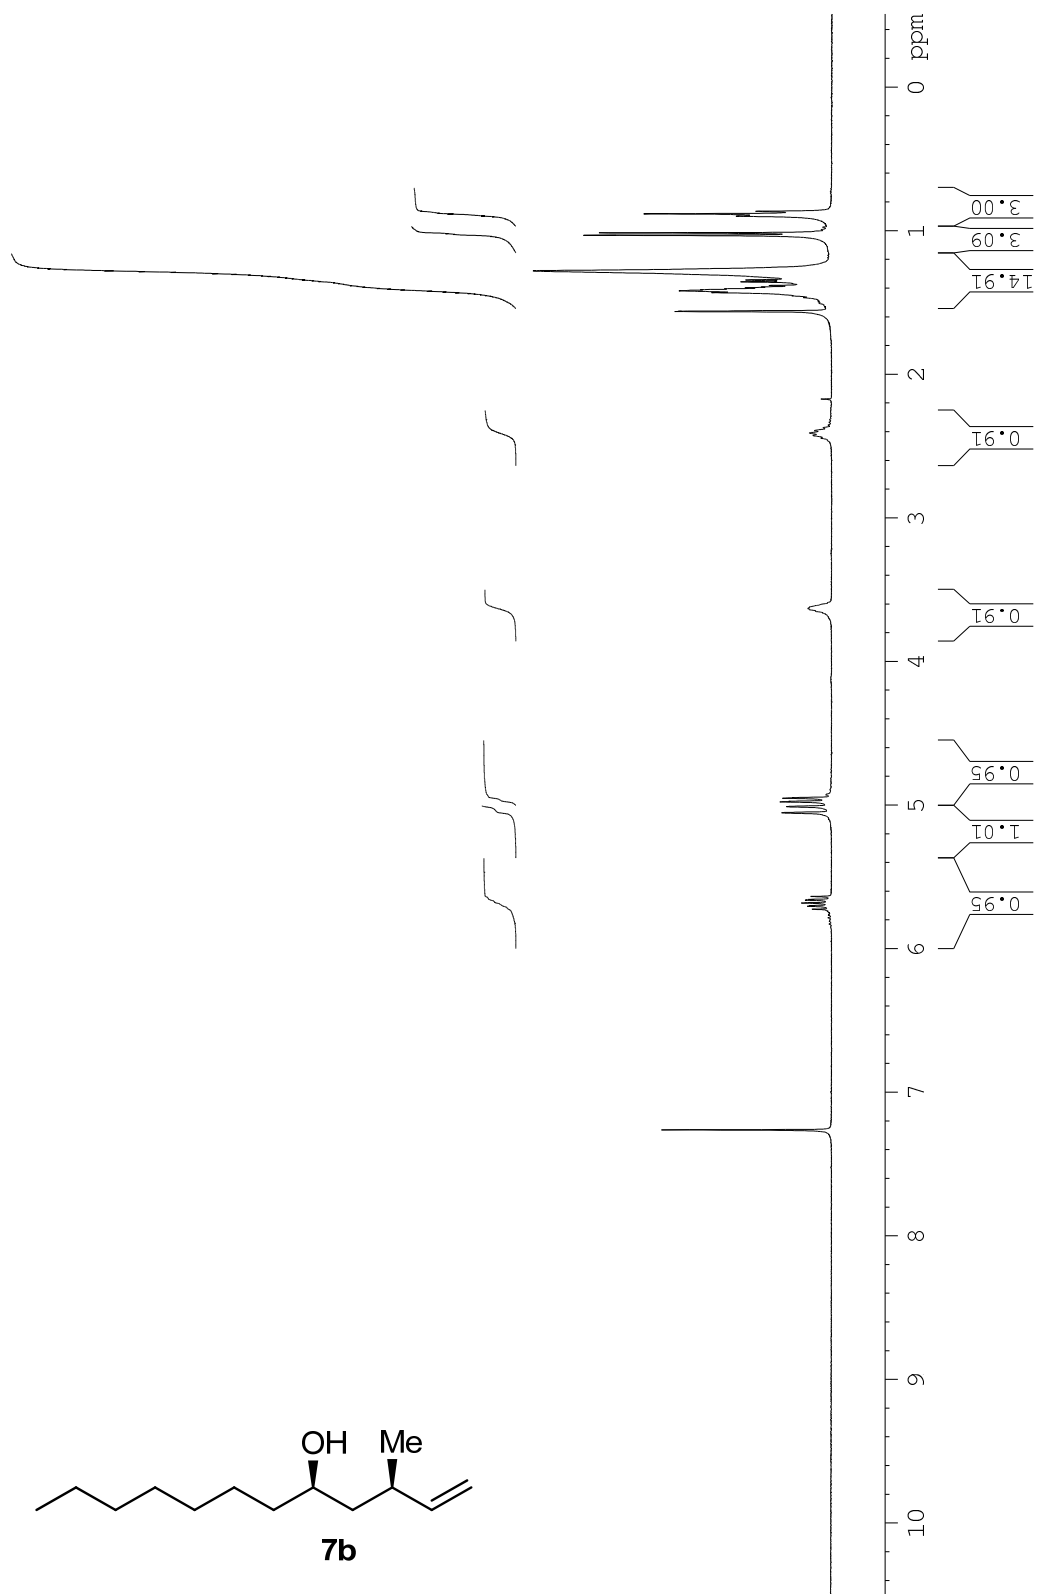

400 MHz  $^1\text{H}$  NMR spectrum of **7c** ( $\text{CDCl}_3$ )

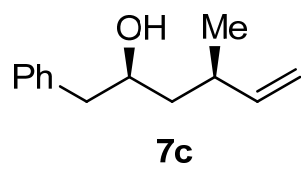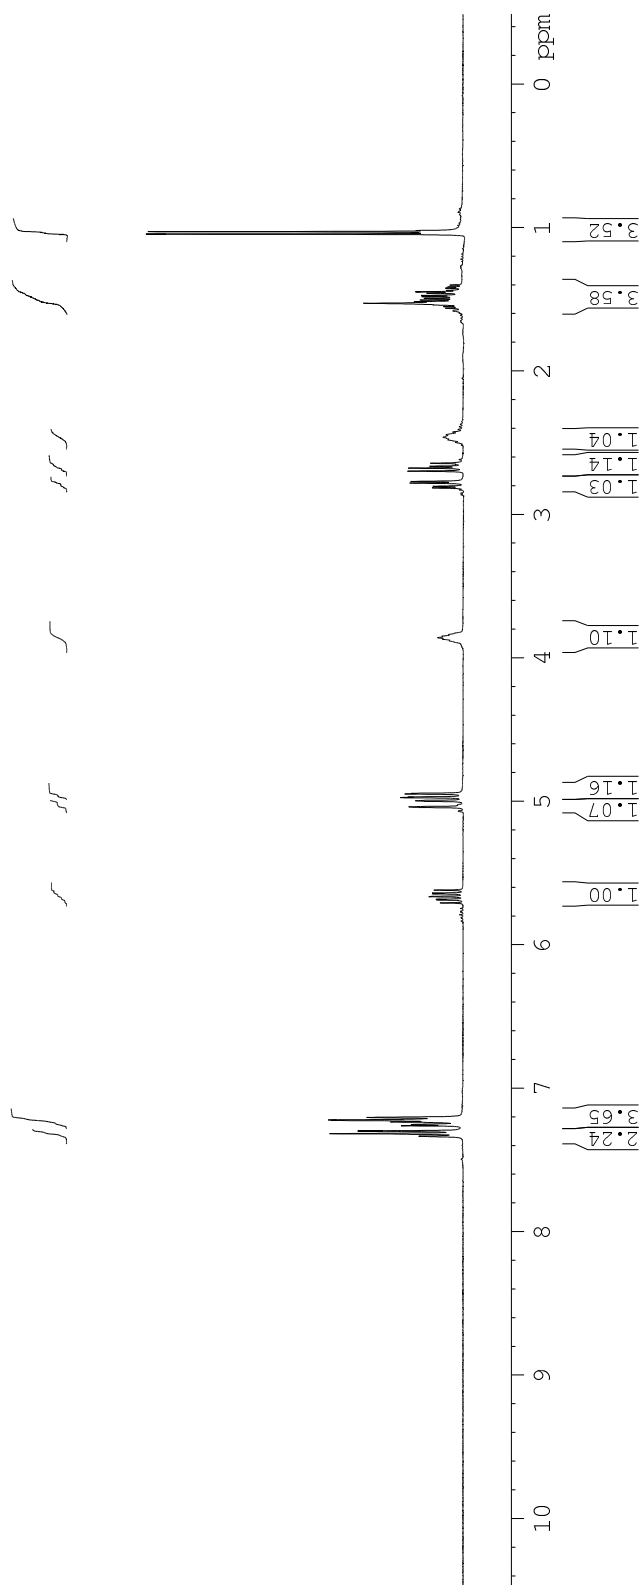

400 MHz  $^1\text{H}$  NMR spectrum of **7d** ( $\text{CDCl}_3$ )

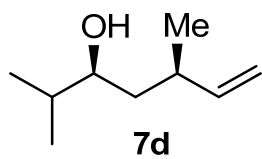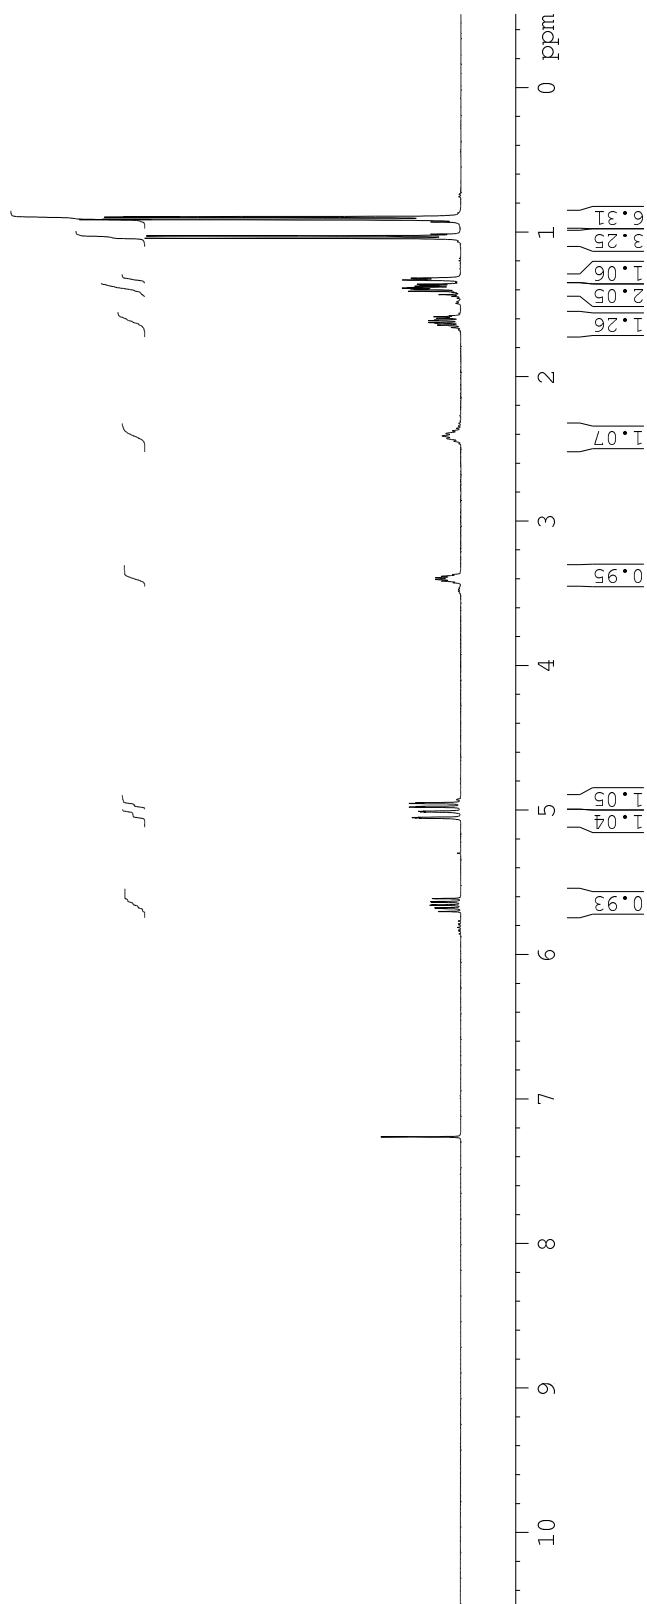

400 MHz  $^1\text{H}$  NMR spectrum of **7e** ( $\text{CDCl}_3$ )

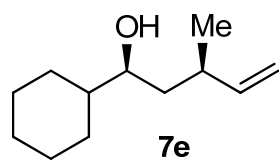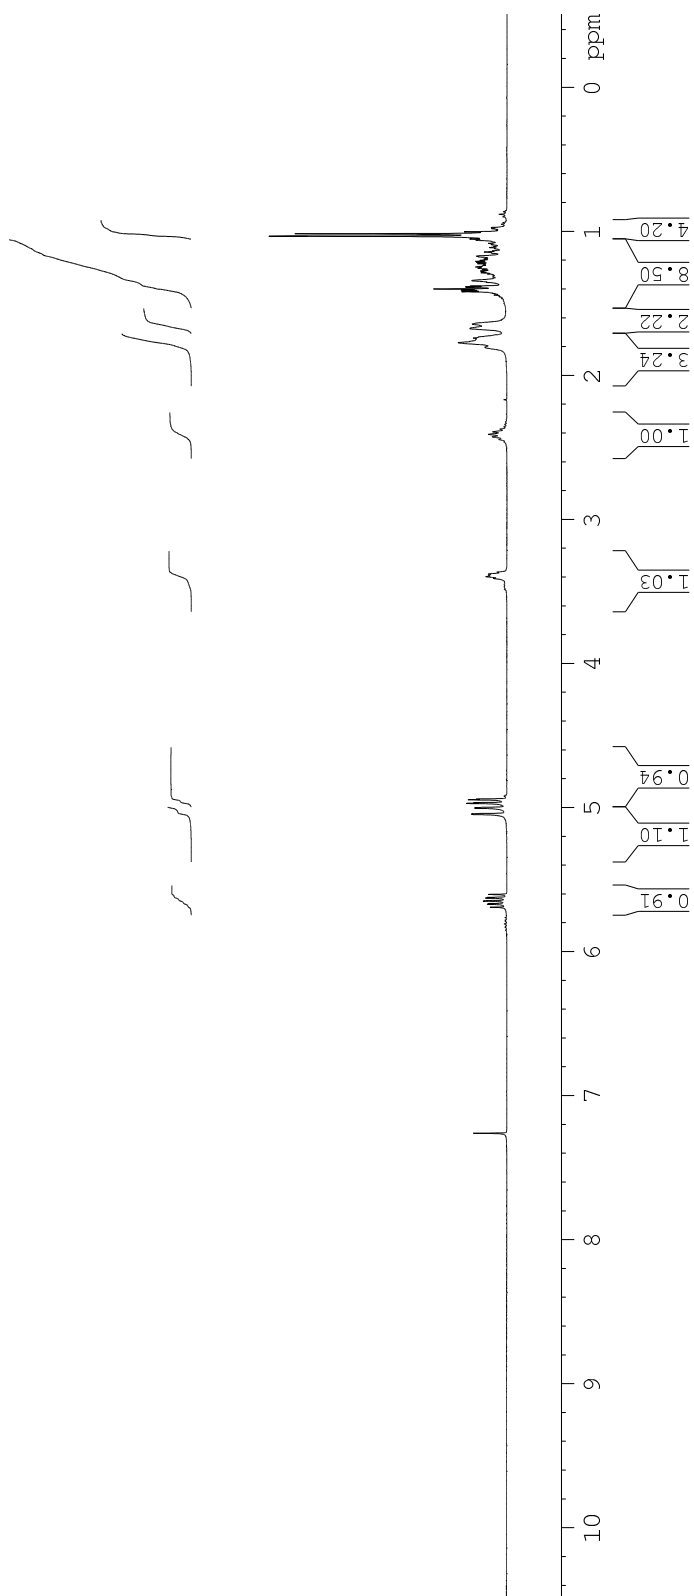



400 MHz  $^1\text{H}$  NMR spectrum of **7f** ( $\text{CDCl}_3$ )

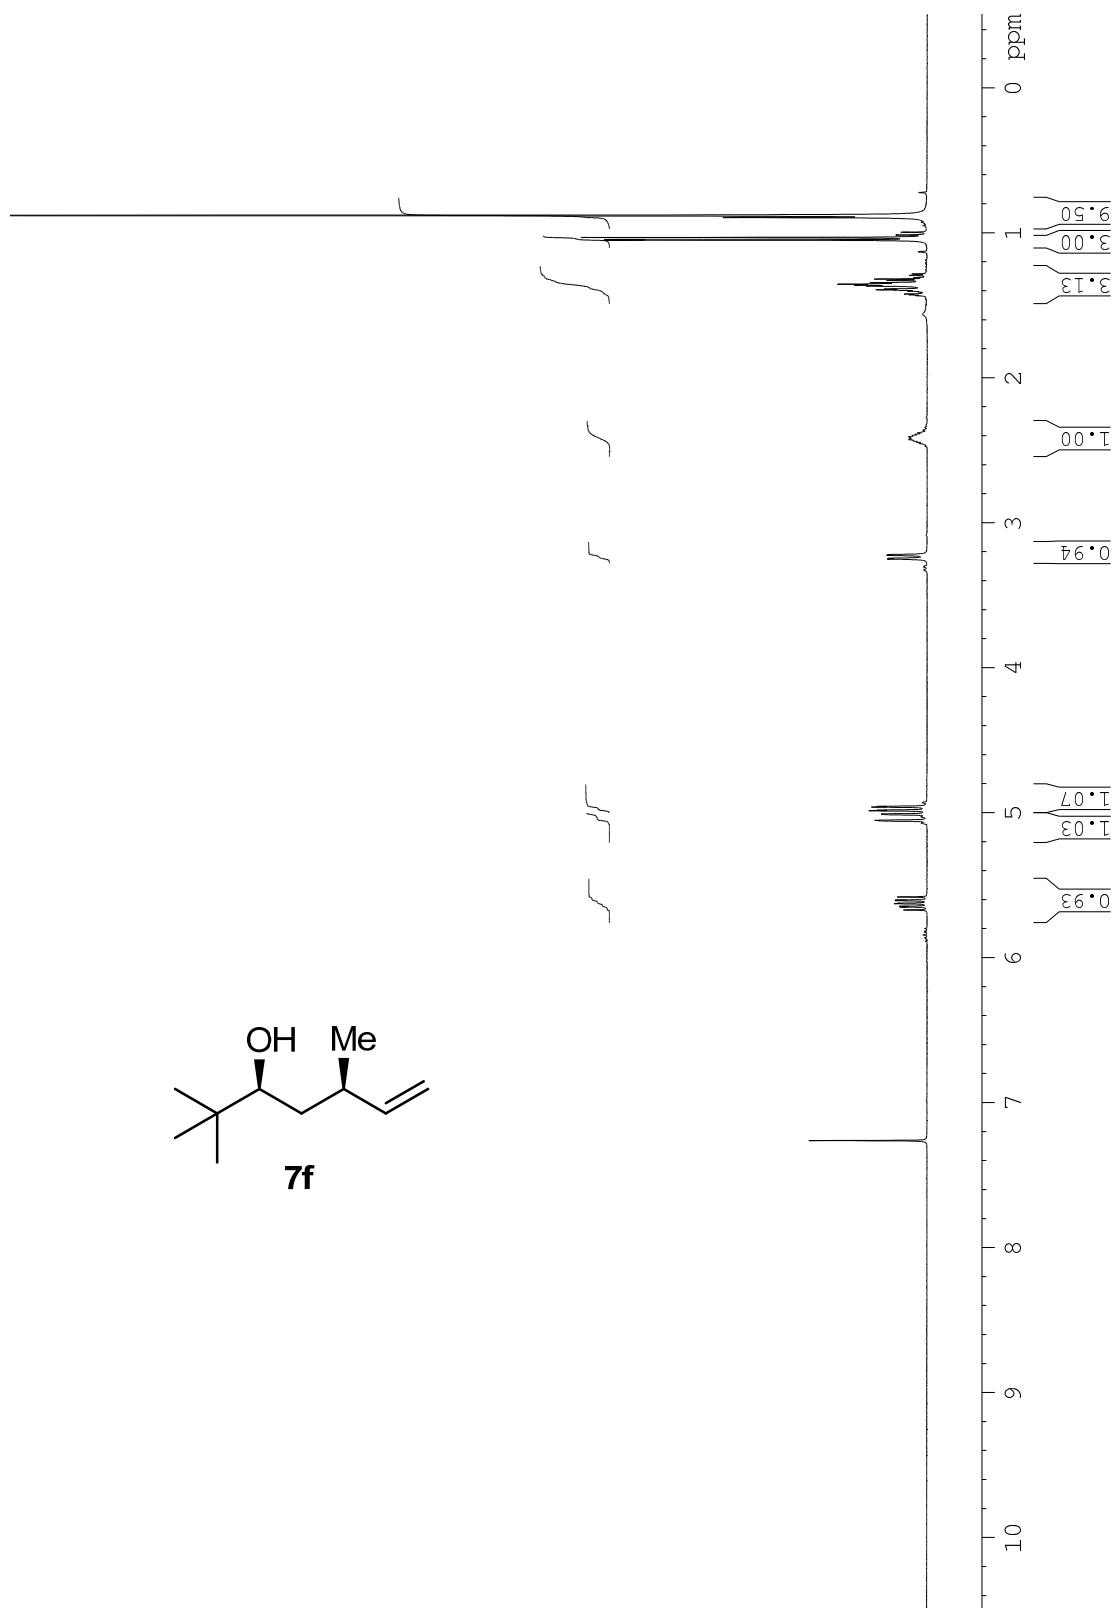

400 MHz  $^1\text{H}$  NMR spectrum of **7g** ( $\text{CDCl}_3$ )

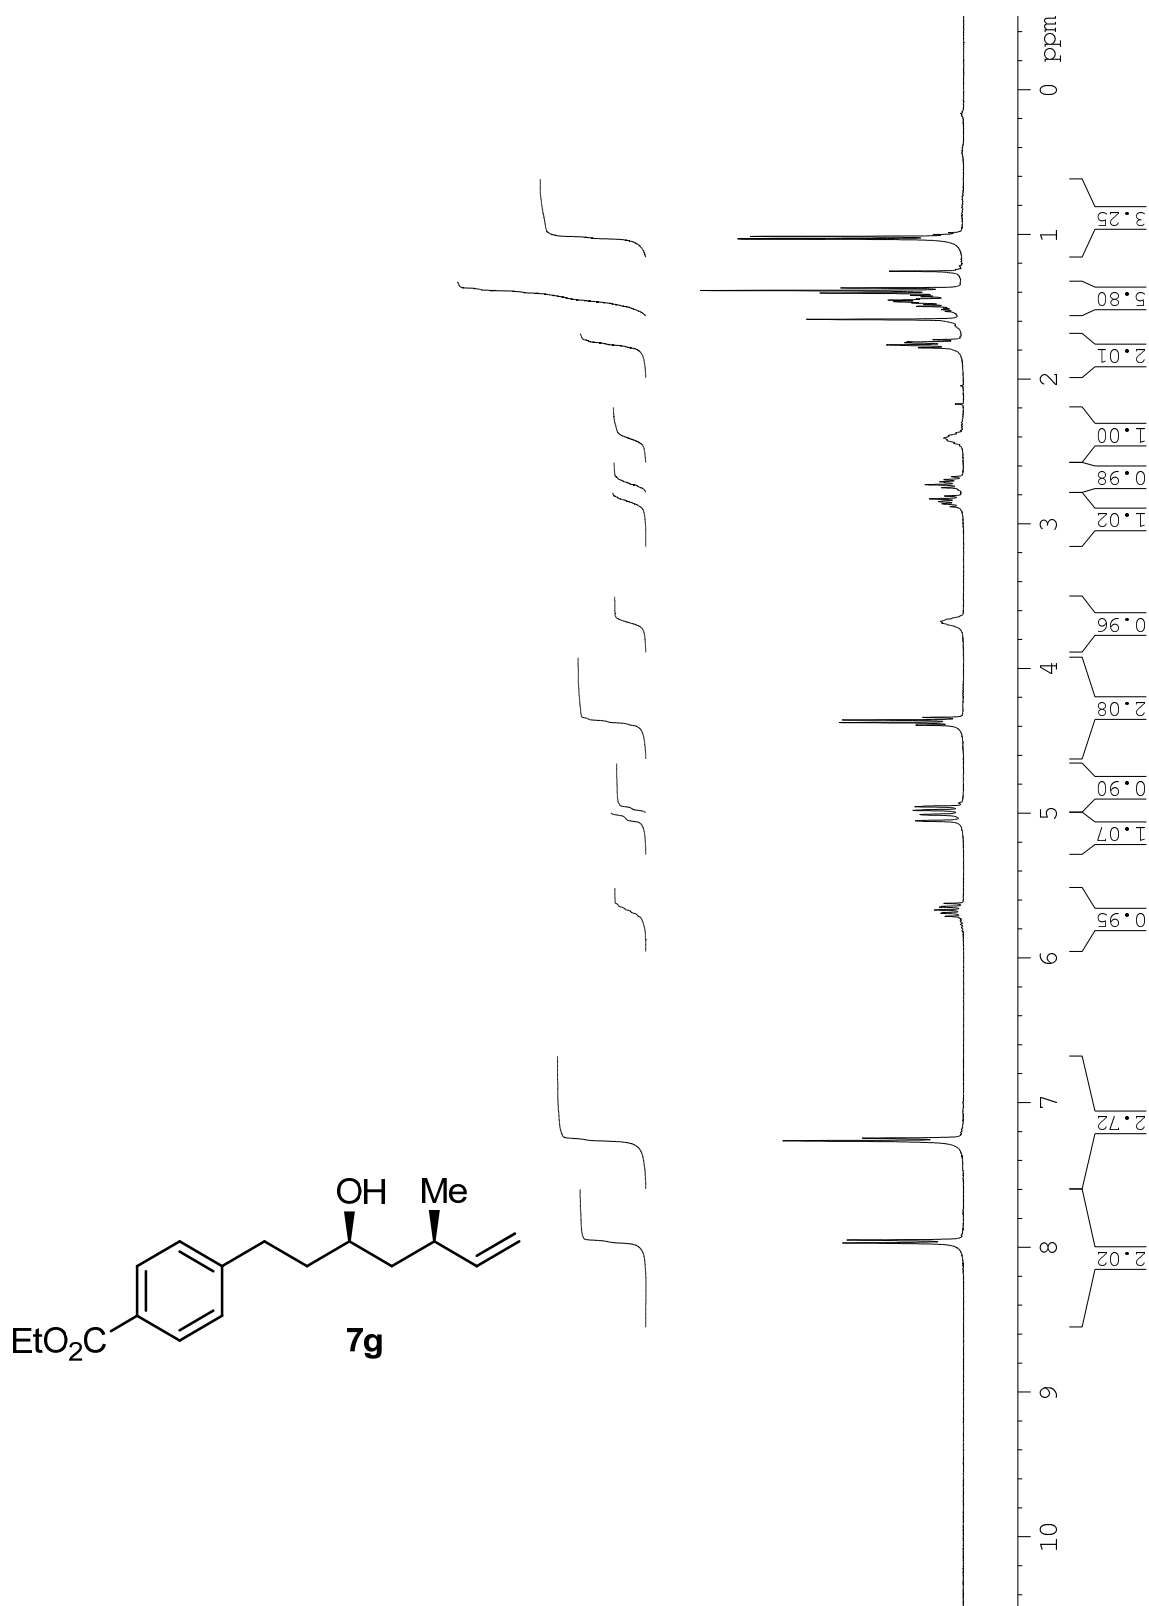

400 MHz  $^1\text{H}$  NMR spectrum of **7h** ( $\text{CDCl}_3$ )

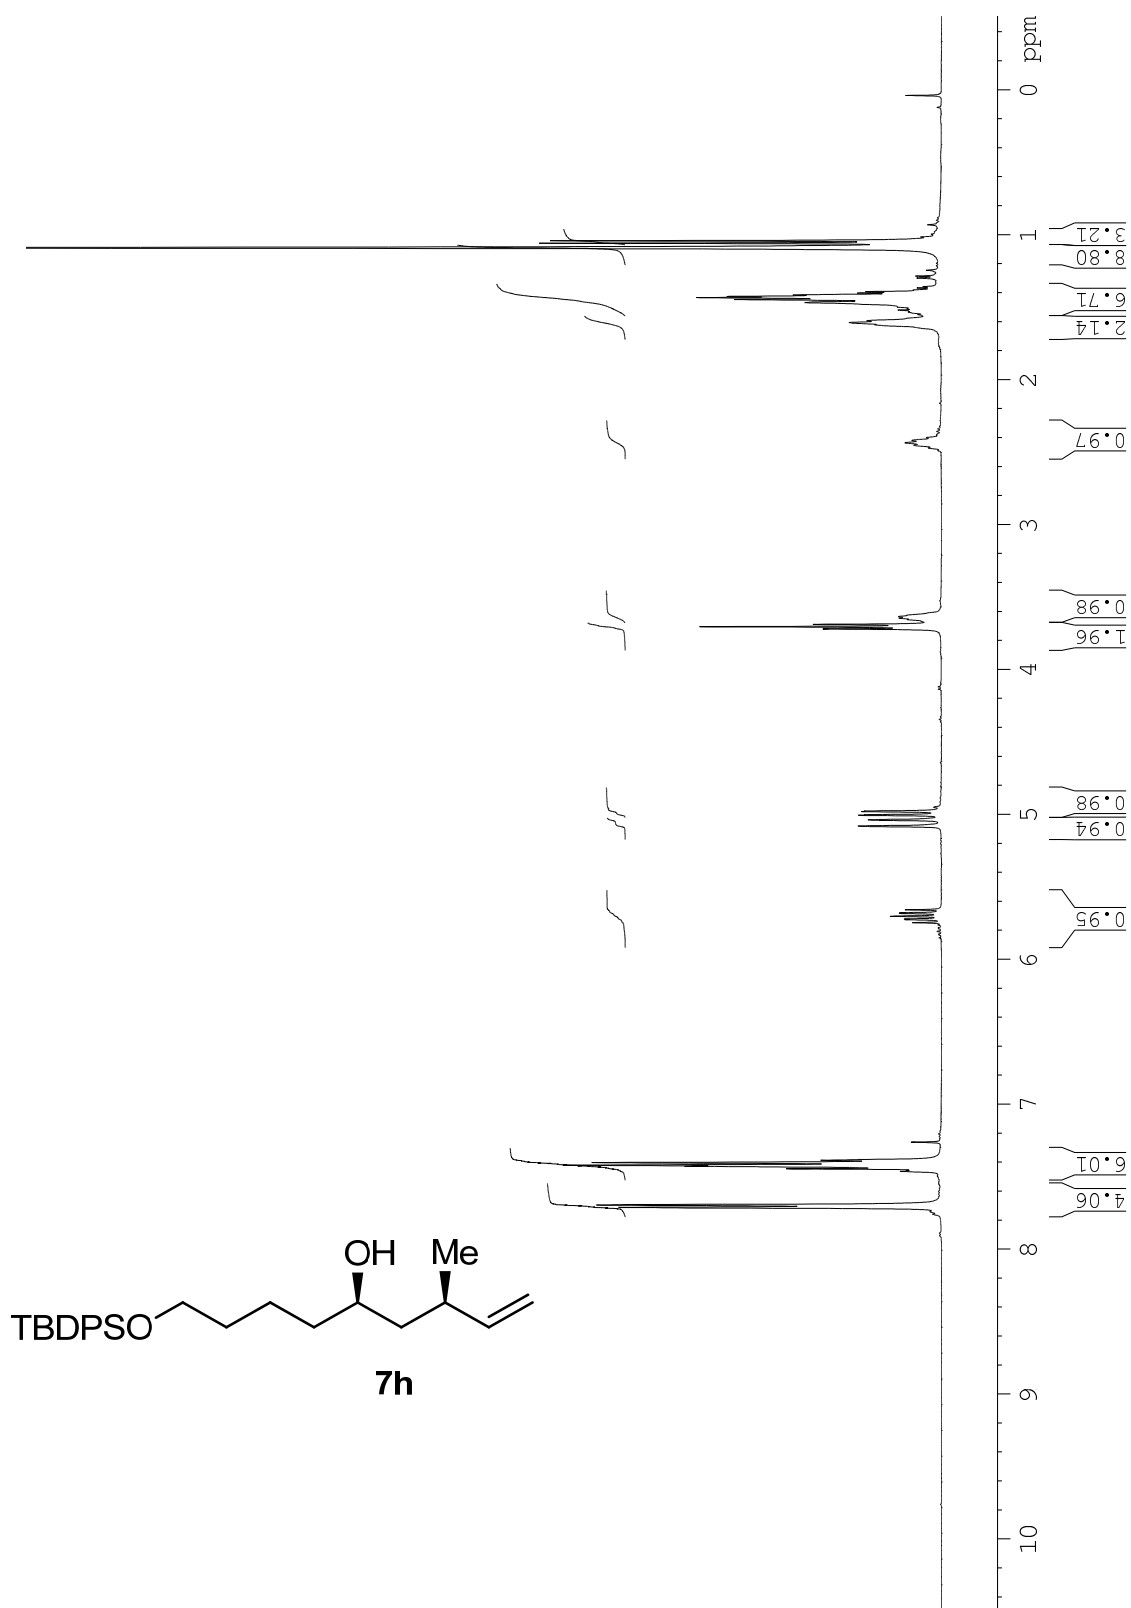



400 MHz  $^1\text{H}$  NMR spectrum of **7i** ( $\text{CDCl}_3$ )

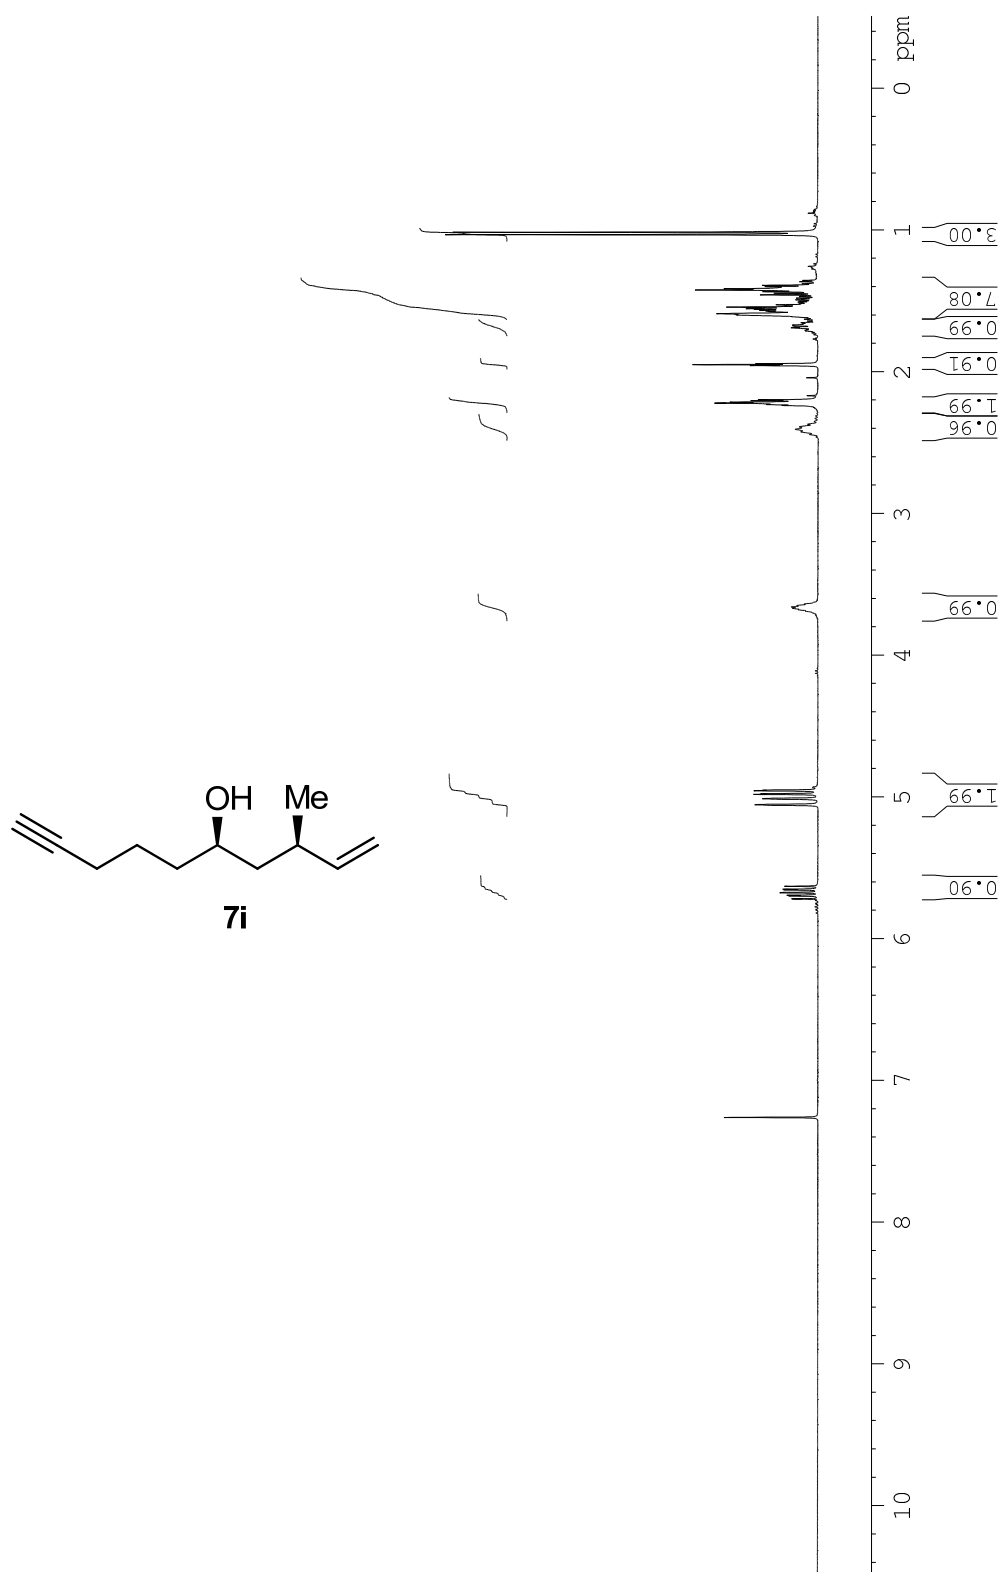

100 MHz  $^{13}\text{C}$  NMR spectrum of **7i** ( $\text{CDCl}_3$ )

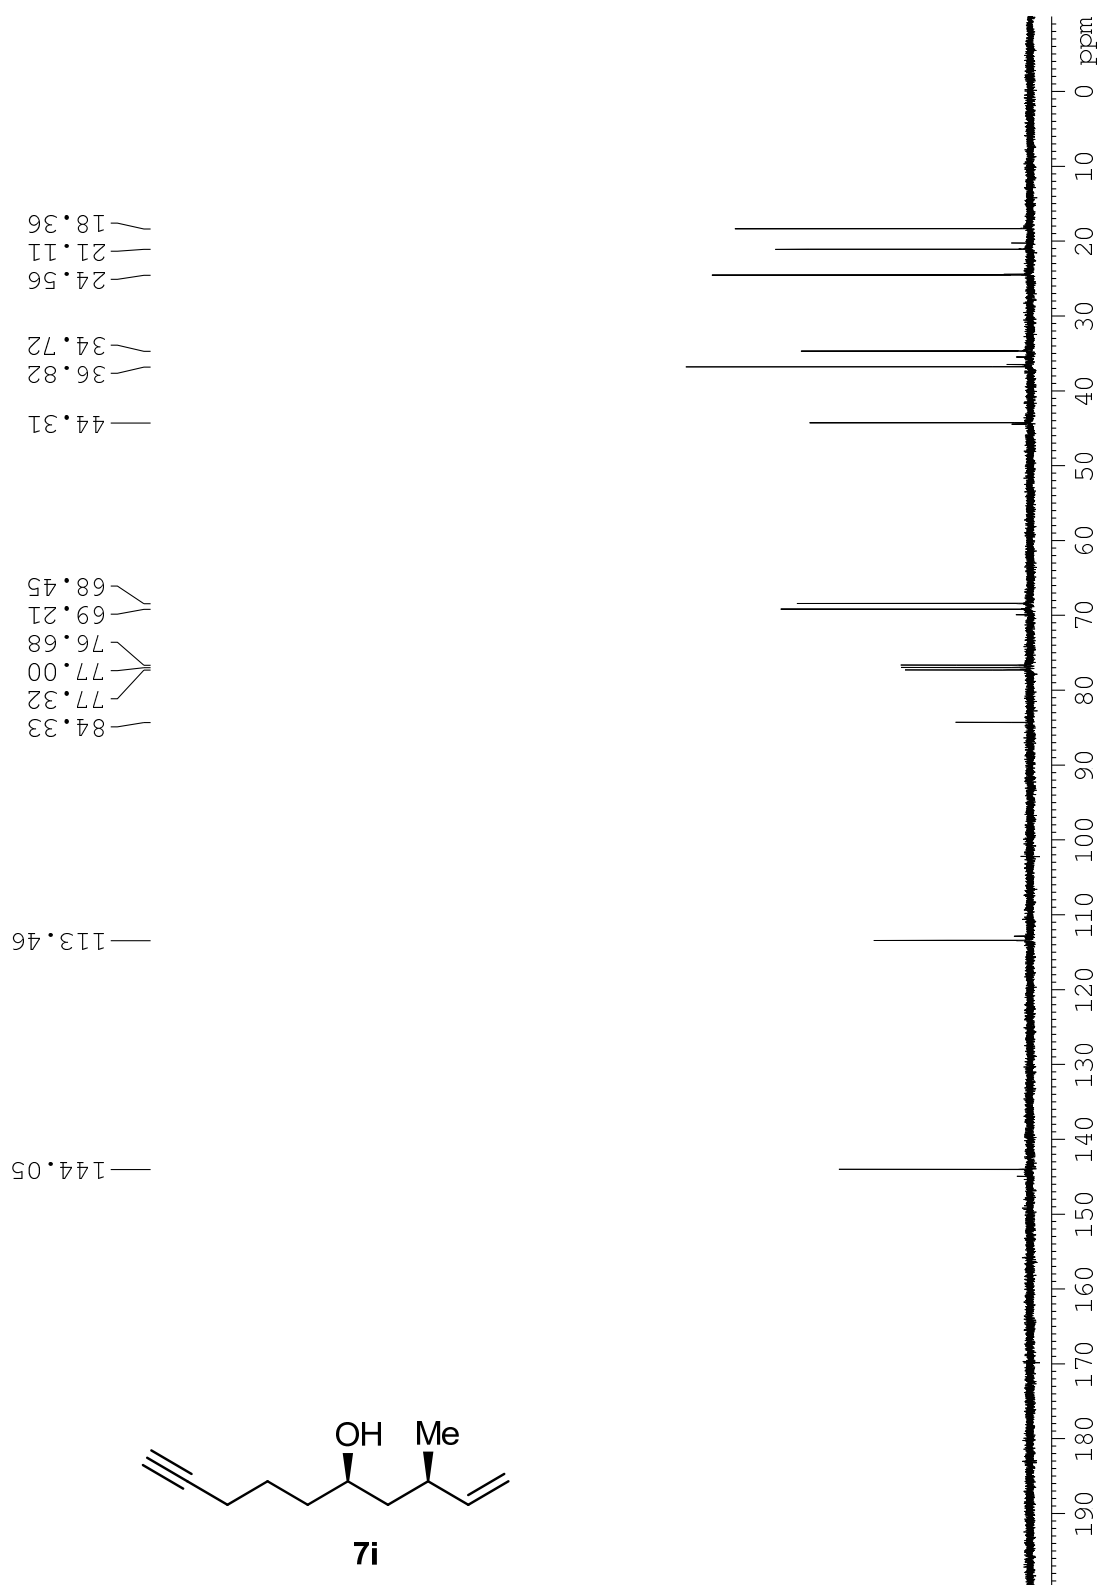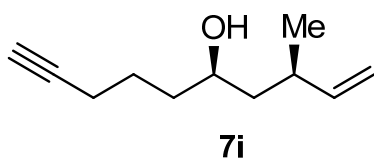

400 MHz  $^1\text{H}$  NMR spectrum of **7j** ( $\text{CDCl}_3$ )

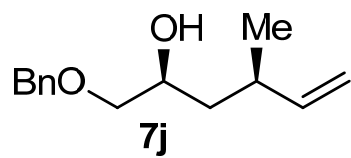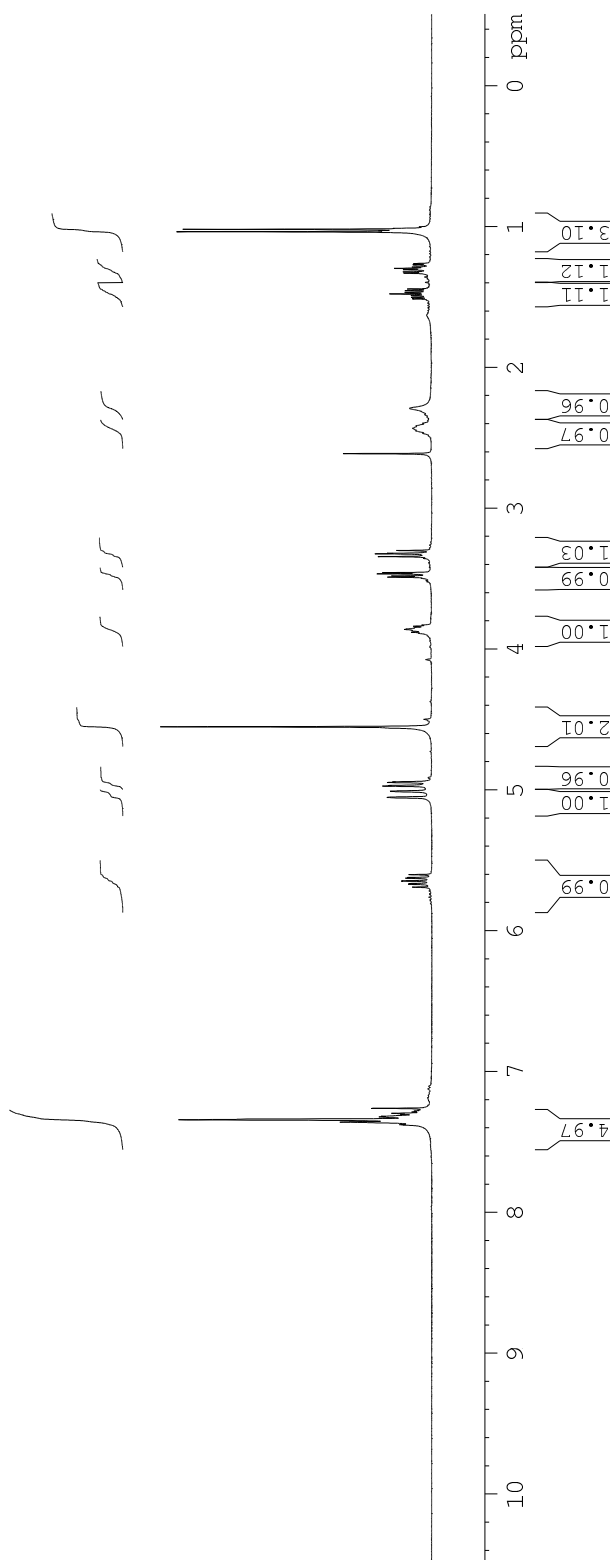

100 MHz  $^{13}\text{C}$  NMR spectrum of **7j** ( $\text{CDCl}_3$ )

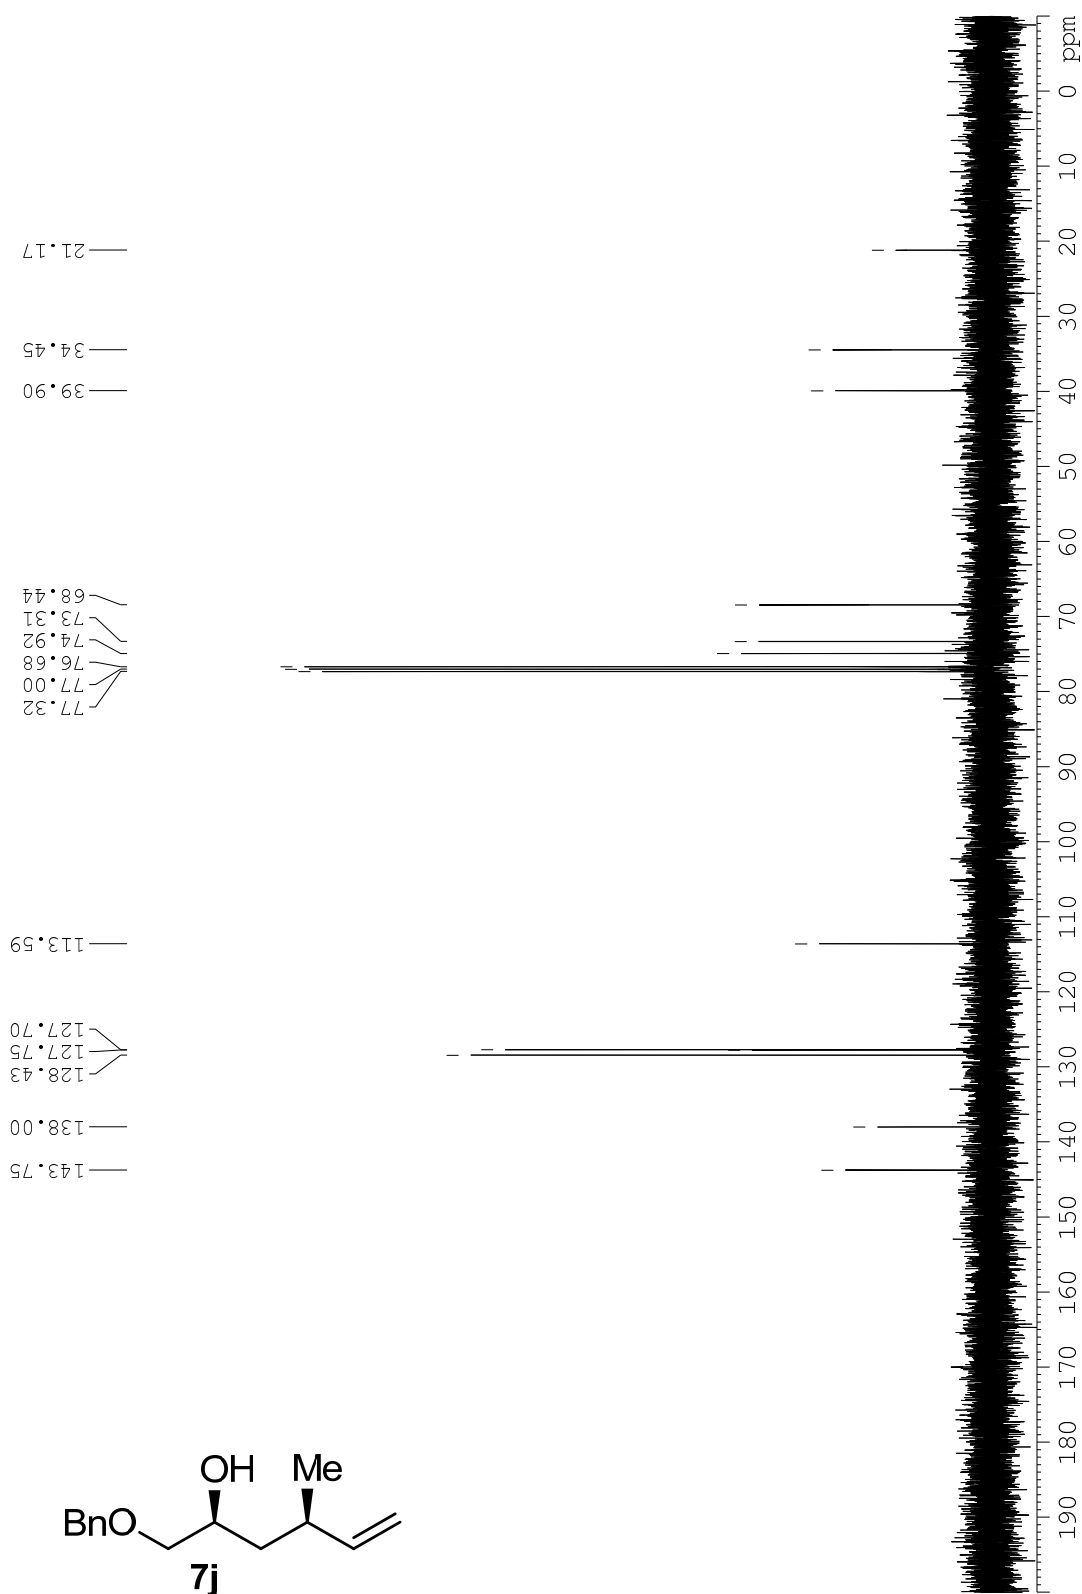



400 MHz  $^1\text{H}$  NMR spectrum of **7k** ( $\text{CDCl}_3$ )

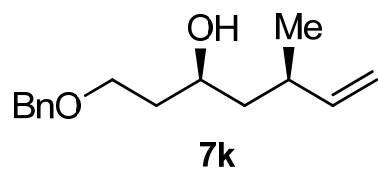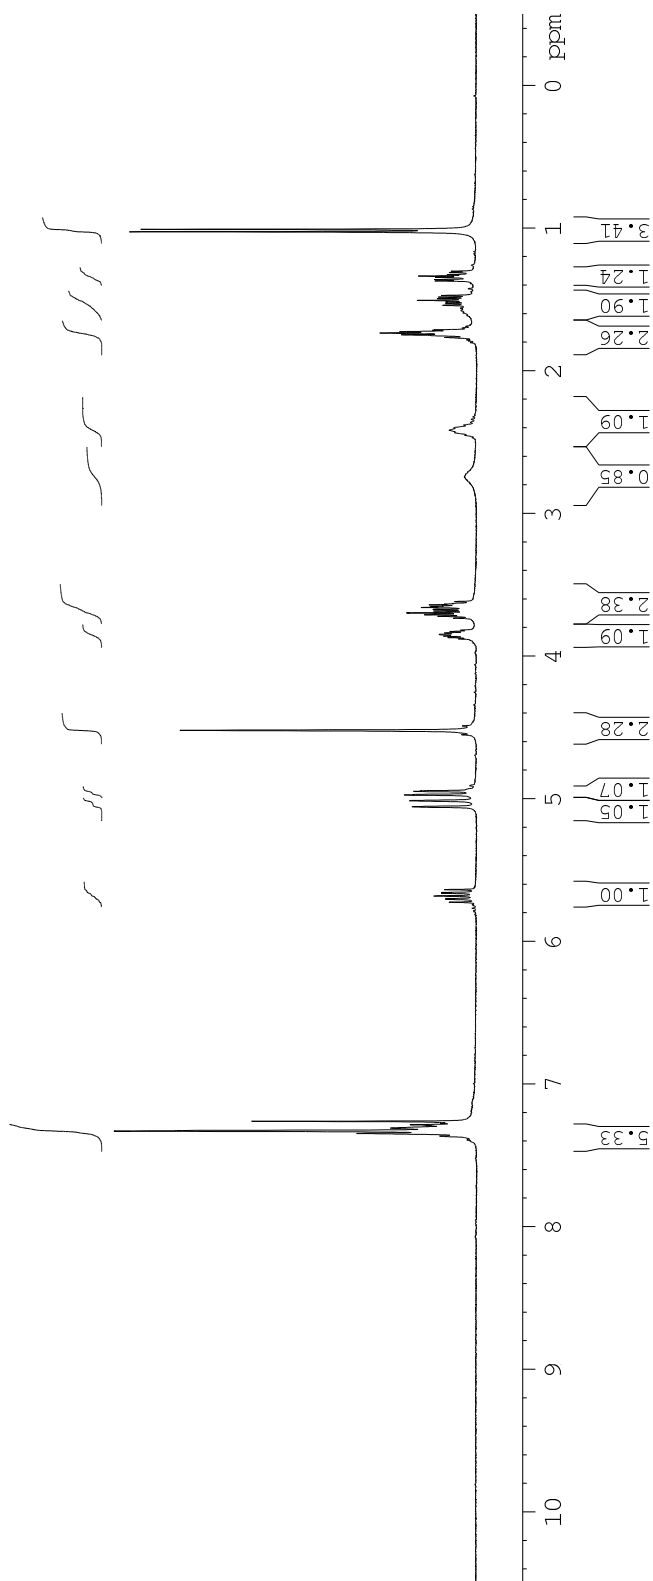

100 MHz  $^{13}\text{C}$  NMR spectrum of **7k** ( $\text{CDCl}_3$ )

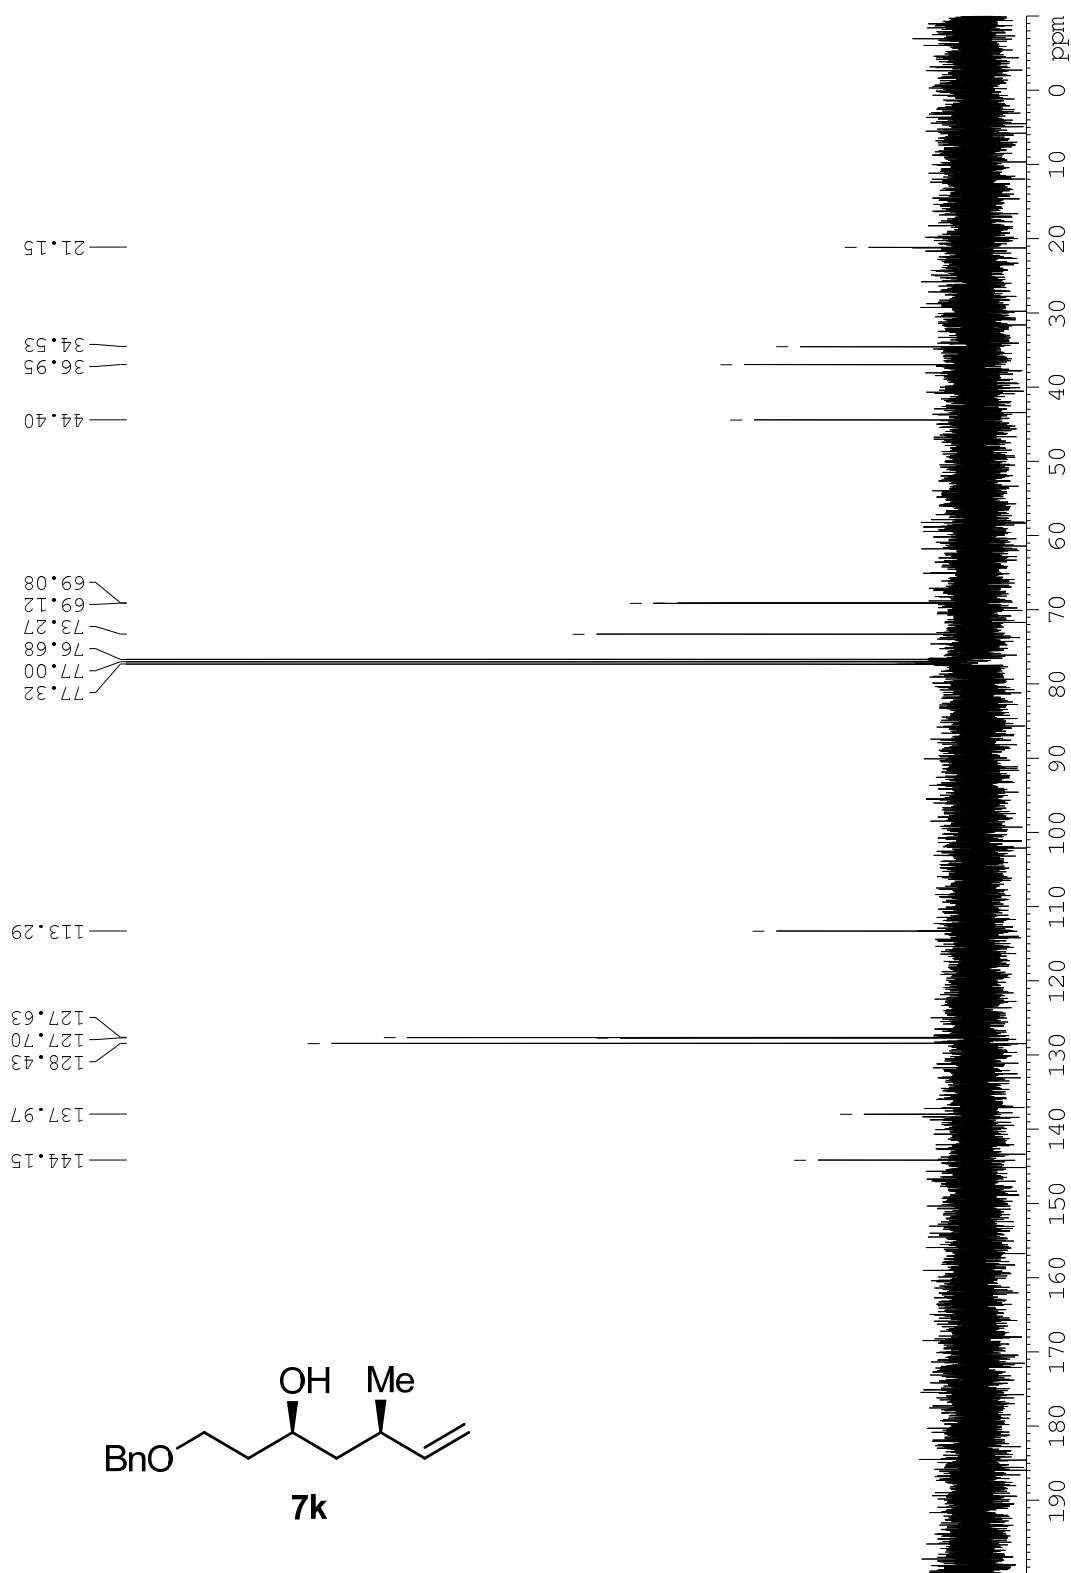

376 MHz  $^{19}\text{F}$  spectrum of  $\text{B}(\text{OTFA})_3$

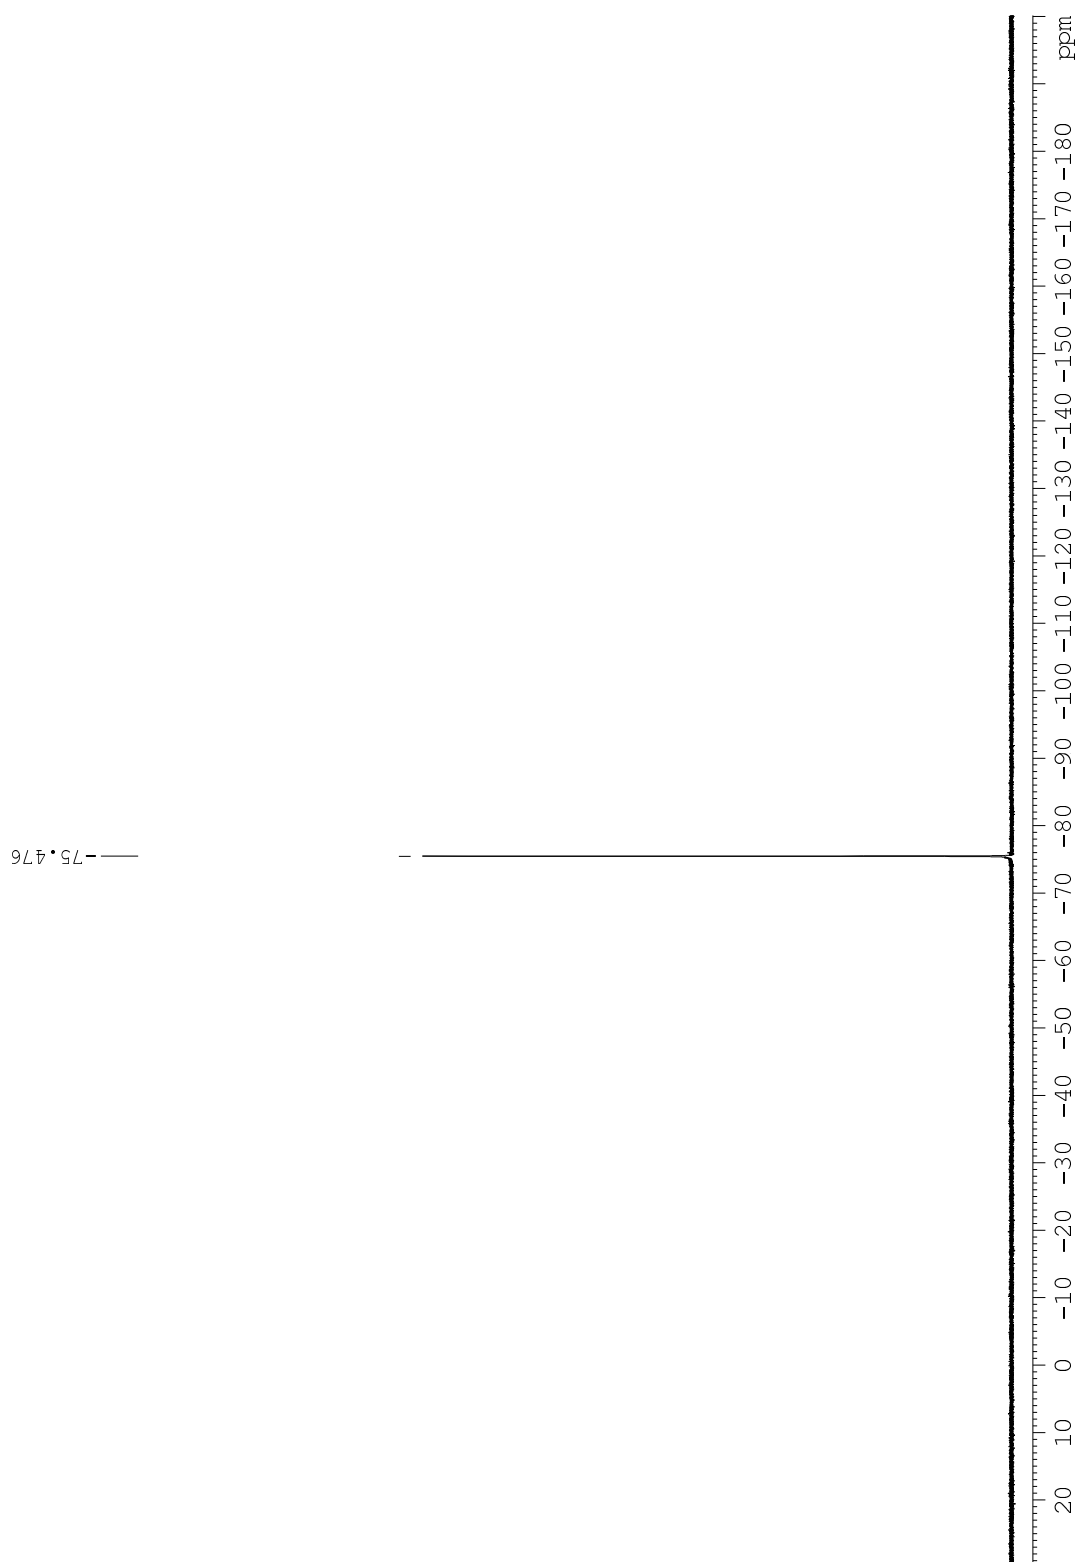

100 MHz  $^{13}\text{C}$  spectrum of  $\text{B}(\text{OTFA})_3$

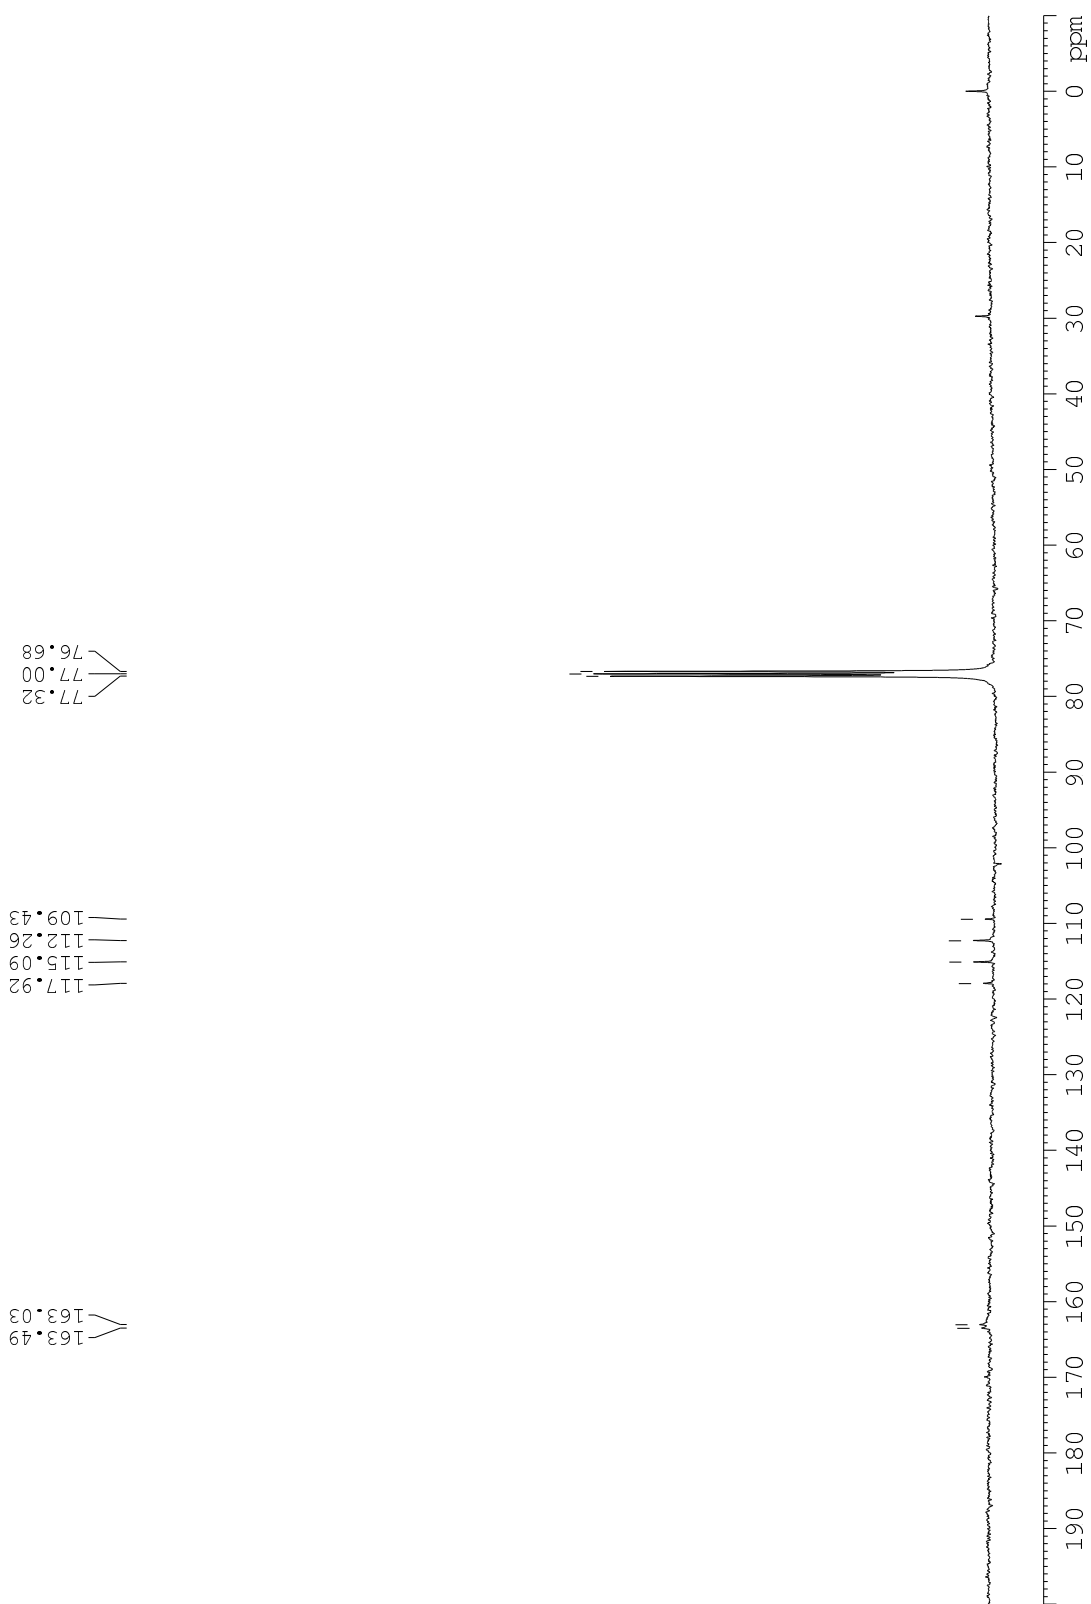

400 MHz  $^1\text{H}$  NMR ( $\text{CDCl}_3$ ) observation of homoallylation at partial conversion ( $\text{PhBCl}_2$  promoter vs  $\text{B}(\text{TFA})_3$ ), supporting Scheme 2 of the main text.

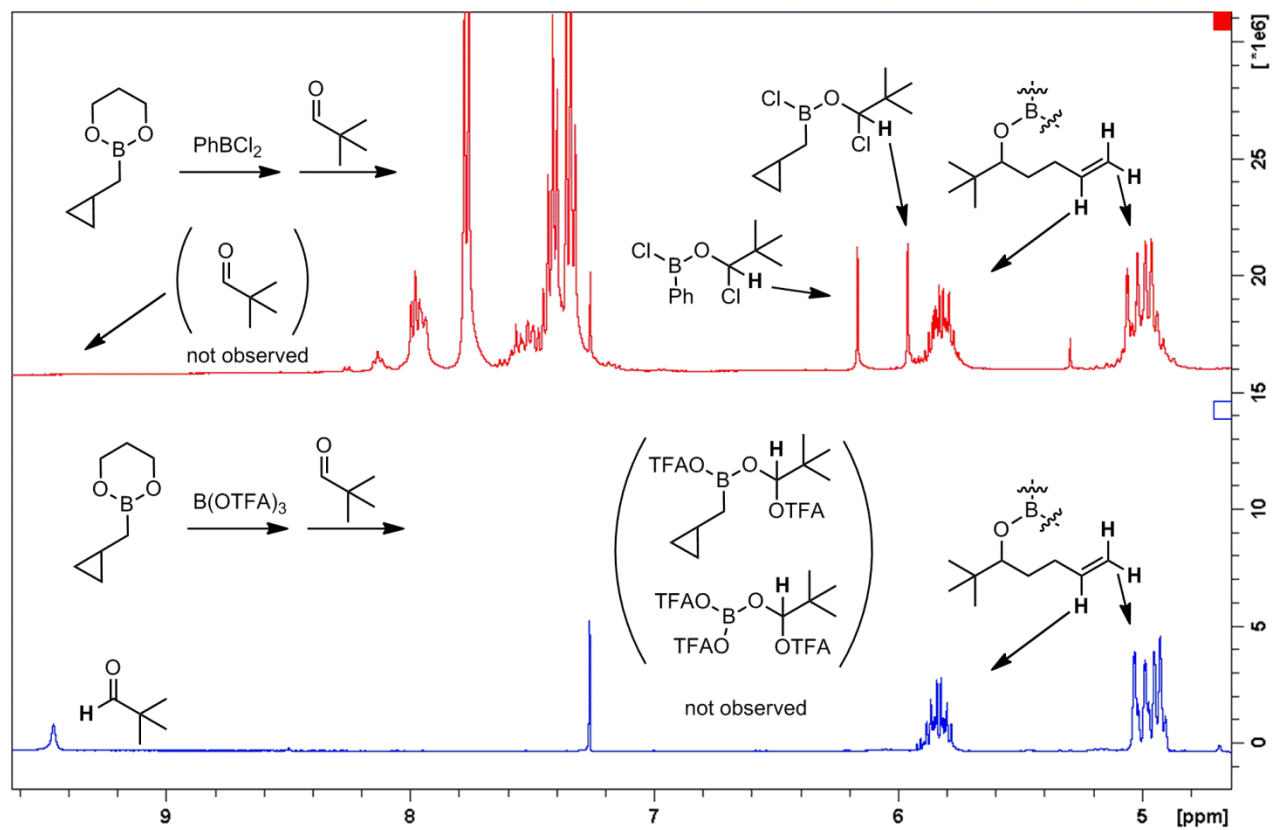

Complete citation for ref. 33:

a) *Gaussian 09*, Rev. D.01, Frisch, M. J.; Trucks, G. W.; Schlegel, H. B.; Scuseria, G. E.; Robb, M. A.; Cheeseman, J. R.; Scalmani, G.; Barone, V.; Mennucci, B.; Petersson, G. A.; Nakatsuji, H.; Caricato, M.; Li, X.; Hratchian, H. P.; Izmaylov, A. F.; Bloino, J.; Zheng, G.; Sonnenberg, J. L.; Hada, M.; Ehara, M.; Toyota, K.; Fukuda, R.; Hasegawa, J.; Ishida, M.; Nakajima, T.; Honda, Y.; Kitao, O.; Nakai, H.; Vreven, T.; Montgomery, J. A.; Jr.; Peralta, J. E.; Ogliaro, F.; Bearpark, M.; Heyd, J. J.; Brothers, E.; Kudin, K. N.; Staroverov, V. N.; Keith, T.; Kobayashi, R.; Normand, J.; Raghavachari, K.; Rendell, A.; Burant, J. C.; Iyengar, S. S.; Tomasi, J.; Cossi, M.; Rega, N.; Millam, J. M.; Klene, M.; Knox, J. E.; Cross, J. B.; Bakken, V.; Adamo, C.; Jaramillo, C.; Gomperts, R.; Stratmann, R. E.; Yazyev, O.; Austin, A. J.; Cammi, R.; Pomelli, C.; Ochterski, J. W.; Martin, R. L.; Morokuma, K.; Zakrzewski, V. G.; Voth, G. A.; Salvador, P.; Dannenberg, J. J.; Dapprich, S.; Daniels, A. D.; Farkas, O.; Foresman, J. B.; Ortiz, J. V.; Cioslowski, J.; Fox, D. J. *Gaussian, Inc. Wallingford CT, 2013.* b) *Gaussian 09*, Rev. B.01, Frisch, M. J.; Trucks, G. W.; Schlegel, H. B.; Scuseria, G. E.; Robb, M. A.; Cheeseman, J. R.; Scalmani, G.; Barone, V.; Mennucci, B.; Petersson, G. A.; Nakatsuji, H.; Caricato, M.; Li, X.; Hratchian, H. P.; Izmaylov, A. F.; Bloino, J.; Zheng, G.; Sonnenberg, J. L.; Hada, M.; Ehara, M.; Toyota, K.; Fukuda, R.; Hasegawa, J.; Ishida, M.; Nakajima, T.; Honda, Y.; Kitao, O.; Nakai, H.; Vreven, T.; Montgomery, J. A.; Jr.; Peralta, J. E.; Ogliaro, F.; Bearpark, M.; Heyd, J. J.; Brothers, E.; Kudin, K. N.; Staroverov, V. N.; Keith, T.; Kobayashi, R.; Normand, J.; Raghavachari, K.; Rendell, A.; Burant, J. C.; Iyengar, S. S.; Tomasi, J.; Cossi, M.; Rega, N.; Millam, J. M.; Klene, M.; Knox, J. E.; Cross, J. B.; Bakken, V.; Adamo, C.; Jaramillo, J.; Gomperts, R.; Stratmann, R. E.; Yazyev, O.; Austin, A. J.; Cammi, R.; Pomelli, C.; Ochterski, J. W.; Martin, R. L.; Morokuma, K.; Zakrzewski, V. G.; Voth, G. A.; Salvador, P.; Dannenberg, J. J.; Dapprich, S.; Daniels, A. D.; Farkas, O.; Foresman, J. B.; Ortiz, J. V.; Cioslowski, J.; Fox, D. J. *Gaussian, Inc. Wallingford CT, 2010.*

#### Cartesian coordinates and energies

```
Compound 1      C7H13B1O2
C, -2.0281399921, 1.315614554, 0.3468093876
C, -2.9966822293, 0.2441168907, -0.128615922
C, -2.491674425, -1.12361314, 0.3036640435
H, -2.0364953063, 1.3822625344, 1.439682937
H, -2.2908986278, 2.2961506726, -0.0514679816
H, -3.9929171729, 0.4252405809, 0.2821913967
H, -3.0746853233, 0.2791914231, -1.2189468597
H, -2.5437565404, -1.2240568351, 1.3926553773
H, -3.0861447862, -1.9252216362, -0.1359286851
B, -0.2923432129, -0.2645418349, -0.2942546304
O, -0.6930421205, 1.0309225158, -0.081690773
O, -1.1355635977, -1.331713194, -0.1060119173
C, 1.1739696538, -0.5335921194, -0.8024873637
H, 1.4472235121, -1.5714848228, -0.589643026
H, 1.1734327536, -0.4499573973, -1.8983387162
C, 2.2139568192, 0.4080227221, -0.2298346377
C, 2.8819825511, 0.0812711976, 1.0776273743
C, 3.667244693, 0.0251049746, -0.2117498982
H, 2.0030939346, 1.4585034783, -0.3925391709
H, 2.6265809499, -0.8595033359, 1.5506289874
H, 3.09198483, 0.8856603634, 1.7708284802
H, 4.4106642398, 0.7916889007, -0.3900624058
H, 3.9323193972, -0.9521864926, -0.5964159965
Electronic energy = -450.1354253
Zero-point electronic energy = -449.936361
Thermal energy = -449.926325
```

Enthalpy = -449.925381  
Free energy = -449.974359  
Free energy (quasiharmonic approximation) = -449.971221

Boron tris(trifluoroacetate) C6B1F9O6  
B,0.0168830986,-0.0365678903,-0.0087289536  
O,1.3711168429,-0.2063514595,0.1297480262  
C,2.0248640086,-1.3501853707,0.4711065932  
O,1.5917897947,-2.2438311668,1.1169594118  
O,-0.8236074088,-1.1209841547,-0.063301507  
C,-2.0764128269,-1.1187661235,-0.5930325463  
O,-2.469771708,-0.4100654162,-1.4580936976  
O,-0.5126986062,1.2315488384,-0.0223292161  
C,0.1176514686,2.3735308699,-0.3980720262  
O,1.0443613853,2.4557236498,-1.1324143714  
C,-0.5926387994,3.586745107,0.2563426031  
C,-2.9188613782,-2.2350630038,0.0769335363  
C,3.471630615,-1.2918612783,-0.0855826773  
F,-0.0227803147,4.7210467311,-0.134609521  
F,-0.5032649748,3.4945636824,1.5947257055  
F,-1.8887110928,3.6105775086,-0.081560492  
F,-4.1457200707,-2.2536666032,-0.4334739099  
F,-3.001361509,-2.0127737382,1.3981006161  
F,-2.3466247362,-3.4303458114,-0.1208743109  
F,3.4401568224,-1.2172882021,-1.425470382  
F,4.1438421633,-2.382224615,0.2686430803  
F,4.1106372263,-0.2134837071,0.3881440389  
Electronic energy = -1604.2189607  
Zero-point electronic energy = -1604.128250  
Thermal energy = -1604.107357  
Enthalpy = -1604.106413  
Free energy = -1604.186687  
Free energy (quasiharmonic approximation) = -1604.175566

Compound 9 C5H6B1F3O4  
B,-1.1120273147,0.2200970148,0.0151903184  
O,-1.5527703887,-1.0227144778,0.3182628515  
O,-1.8855469319,1.2738871573,-0.3334119774  
C,-3.310618356,1.0913734248,-0.4143647862  
C,-2.9611861093,-1.296752295,0.2201212624  
C,-3.7741805604,-0.0401428193,0.4909854886  
H,-3.765116813,2.0404865802,-0.1337936825  
H,-3.5637845632,0.8851584155,-1.4576578283  
H,-4.8348208936,-0.2383054715,0.321051165  
H,-3.6550344212,0.2532200001,1.5374332086  
H,-3.1629649599,-1.6884512458,-0.7804266898  
H,-3.1791973544,-2.0799566357,0.9445040424  
O,0.2717440749,0.4828460102,0.1446864252  
C,1.2043796672,-0.2503863653,-0.454070586  
O,1.0526007669,-1.0319701539,-1.3446357925  
C,2.5967549941,0.0728805234,0.1508745534  
F,2.6206934615,-0.2343013709,1.4606557586  
F,3.551008124,-0.6267420895,-0.4621670574  
F,2.8800975775,1.3804737984,0.0227333263  
Electronic energy = -819.9071  
Zero-point electronic energy = -819.778631  
Thermal energy = -819.766721  
Enthalpy = -819.765777  
Free energy = -819.820137  
Free energy (quasiharmonic approximation) = -819.816163

Compound 17 C13H13B2F9O8  
B,1.9522296274,0.364338269,1.6040169582  
C,2.7411424366,0.8951737091,0.3650696711  
H,2.3102771746,0.5463105121,-0.5726469489  
H,2.631966728,1.9865185258,0.3398843817  
O,0.5797397941,-0.0908121103,1.4968774407  
O,2.5452582896,0.3088695229,2.8089975315  
B,-0.2972561688,0.1396598767,0.1884747863  
C,1.9468566297,-0.2589606279,3.9817005017  
C,-0.0900797974,-0.7582444118,2.6550601703  
C,0.9541249059,-1.3282154234,3.5795299032  
H,2.7601259451,-0.6627088138,4.5821284374  
H,1.4646954889,0.5428230093,4.5465371348  
H,0.4437404164,-1.7295237673,4.4577754794  
H,1.4700911556,-2.1568775282,3.0891384042  
H,-0.7055606386,0.0050553979,3.125633821  
H,-0.7090882802,-1.5326348683,2.2237640186  
O,0.229511833,-0.6870113508,-0.8761893899  
C,0.3156521275,-1.9996551637,-0.771598078  
O,0.1219392335,-2.6646688814,0.2091553566

O, -1.6535323349, -0.1073946765, 0.6105397239  
C, -2.607153907, -0.7681723013, -0.0419566149  
O, -2.5042637418, -1.4753687565, -0.9960958788  
O, -0.0697729277, 1.5395195181, -0.1090543896  
C, -0.7928269058, 2.1824666086, -1.0157575007  
O, -1.6971704024, 1.7532372242, -1.6689481537  
C, 0.7969632861, -2.6167555959, -2.110387571  
F, 2.0839077449, -2.253708185, -2.3215639188  
F, 0.7433398928, -3.9466352149, -2.0619428714  
F, 0.0695547443, -2.1909412967, -3.1444751294  
C, -3.9604889174, -0.5208713872, 0.6770561315  
C, -0.2990415285, 3.6498776314, -1.125343754  
F, -0.4306932695, 4.2789550888, 0.0585624945  
F, 1.0027365416, 3.6846096812, -1.468929555  
F, -0.9947718493, 4.3199785131, -2.039026474  
F, -4.2600824534, 0.7865081087, 0.7061793026  
F, -3.8826860007, -0.9567865967, 1.9555885758  
F, -4.9485487107, -1.1729192797, 0.0731927548  
C, 4.2115200545, 0.5221445469, 0.422147832  
C, 4.6645683701, -0.8040459521, -0.128865428  
C, 5.0205707435, 0.4773411697, -0.8418321215  
H, 4.730945223, 0.8646046945, 1.3086701247  
H, 3.9222731559, -1.4403340177, -0.5943885505  
H, 5.450746167, -1.3382689511, 0.3882821906  
H, 6.0487483573, 0.8130684508, -0.8082791962  
H, 4.5107717674, 0.6911250993, -1.772871603  
Electronic energy = -2054.3934447  
Zero-point electronic energy = -2054.100202  
Thermal energy = -2054.068782  
Enthalpy = -2054.067838  
Free energy = -2054.170530  
Free energy (quasiharmonic approximation) = -2054.156703

TS-11 C10H11B1F6O5  
B, -0.0712829745, -0.6786805715, -0.2350614452  
C, -0.7774611998, -1.2725200083, -1.5889857462  
C, -2.1653261133, -1.6595684715, -1.3375897427  
C, -2.3505954445, -2.9985050371, -0.1285956055  
H, -0.7817326422, -0.4388610867, -2.2990651299  
H, -0.1966330726, -2.0897748379, -2.0186444881  
C, -2.7549360282, -2.9120972222, -1.6734895595  
H, 3.8262554131, -2.9595392581, -1.8169490476  
H, -2.1822382418, -3.5883571485, -2.295354813  
H, -2.8435135441, -0.8769155436, -1.0135939148  
H, -3.2674211865, -3.159463288, 0.4199943799  
H, -1.6109408424, -3.7826047806, -0.0507863128  
C, -1.5325807996, -1.9186422199, 1.1811502141  
H, -2.1968990596, -1.0562551598, 1.2207777904  
C, -1.6286439045, -2.8121911636, 2.3902498339  
H, -1.2246754114, -2.2535391351, 3.2368811165  
H, -2.6589364509, -3.0844591295, 2.6161487204  
H, -1.0260602396, -3.7111532183, 2.2620988699  
O, -0.2842864541, -1.6511012406, 0.8408216438  
O, -0.7737721781, 0.5752753659, 0.2030327785  
C, -0.8209070516, 1.6761332923, -0.5008441114  
O, -0.2900775096, 1.9206736621, -1.5517218673  
O, 1.3625034812, -0.5136237187, -0.4724834942  
C, 2.1814051706, 0.0023805484, 0.4206130421  
O, 1.9245775788, 0.4555445316, 1.5002544009  
C, -1.7620914499, 2.7006626611, 0.1927570953  
C, 3.6388732638, -0.0514268071, -0.1183537717  
F, -3.0310756042, 2.2124190532, 0.1863821924  
F, -1.4176319905, 2.9188543024, 1.4690529048  
F, -1.7714080602, 3.8676958263, -0.449187188  
F, 3.7475915472, 0.5835826688, -1.2980683379  
F, 4.4882145559, 0.5159582322, 0.7408086731  
F, 4.0240072693, -1.3324610979, -0.3008790806  
Electronic energy = -1388.3549952  
Zero-point electronic energy = -1388.133037  
Thermal energy = -1388.111503  
Enthalpy = -1388.110559  
Free energy = -1388.188039  
Free energy (quasiharmonic approximation) = -1388.179877

TS-17 C15H17B2F9O9  
B, 1.7792589002, -1.1237168287, 0.9292412785  
C, 2.1792486931, -1.3075735633, -0.639341777  
C, 3.6413983748, -1.2284081409, -0.8054547282  
C, 4.3200710779, 0.3397782543, -0.3878895946  
H, 1.8899620266, -2.3311758799, -0.89640967  
H, 1.6832840005, -0.6296405971, -1.3261422425



C,4.295955527,-0.4543992444,-1.7995925448  
H,5.2916645355,-0.7299727838,-2.1185293778  
H,3.6886644082,0.052959202,-2.5371885159  
H,4.2345928793,-1.972244261,-0.2852770191  
H,5.3682522665,0.4768079561,-0.1661300727  
H,3.7455373155,1.2387804118,-0.5543499305  
C,3.7814371657,0.1151331094,1.3901761163  
H,4.2848639615,-0.8156393024,1.6574456668  
C,4.3773291356,1.3424726953,2.0326081196  
H,4.1485982799,1.2986173745,3.0995758023  
H,5.459504048,1.3818394661,1.914626109  
H,3.9259055964,2.2477717969,1.6279346632  
O,2.4654442378,0.0858854391,1.471036198  
O,0.2734173414,-0.7754388528,1.137250024  
O,2.1320519085,-2.3190468153,1.6203867221  
B,-0.5415477976,0.0142871024,0.1297021804  
C,1.7137471899,-2.4531187516,2.9702610206  
C,-0.2110277745,-0.9258197131,2.520828262  
C,0.2074965034,-2.2758303889,3.0581686282  
H,2.0137140719,-3.4453116407,3.3091694664  
H,2.2177678344,-1.7123955188,3.6070722638  
H,-0.1293032336,-2.3441325377,4.0963415741  
H,-0.2940193236,-3.0592912712,2.4871240069  
H,0.214437095,-0.1007205664,3.0938016432  
H,-1.2872184401,-0.8275536491,2.4868810849  
O,-0.8605140444,-0.8628185955,-0.9982367556  
C,-1.5366376155,-1.9772425168,-0.8175892047  
O,-1.9810994053,-2.4132275676,0.2085538881  
O,-1.6639381083,0.601132072,0.8350645493  
C,-2.914409896,0.7359649026,0.417450321  
O,-3.4460030955,0.2579125163,-0.5379952875  
O,0.3612693346,1.0615989473,-0.3796773725  
C,-0.0314141509,2.11630123,-1.0548091448  
O,-1.1377363439,2.4628731331,-1.3528226155  
C,-1.6477554284,-2.7545979116,-2.1554646398  
F,-0.4220657301,-3.2269223915,-2.4950753345  
F,-2.4707334507,-3.7961501488,-2.0382104391  
F,-2.0789265443,-1.9787250044,-3.1561769971  
C,-3.6787813903,1.6332964022,1.4289795233  
C,1.2224637418,2.9394873433,-1.4664189908  
F,1.9486204331,3.2995624179,-0.3863960517  
F,2.0376648024,2.191570114,-2.2563818596  
F,0.8961072413,4.0372962586,-2.1362546627  
F,-3.1066562624,2.8445887906,1.5336695351  
F,-3.664113839,1.064200624,2.6558423059  
F,-4.9481980532,1.7961068836,1.0626438762  
Electronic energy = -2208.2789521  
Zero-point electronic energy = -2207.926462  
Thermal energy = -2207.892254  
Enthalpy = -2207.891310  
Free energy = -2207.998615  
Free energy (quasiharmonic approximation) = -2207.984939

BC12(OMe) C1H3B1Cl2O1  
B,0.1278918863,-0.1502484357,0.0407759762  
Cl,1.8315039344,-0.5303989002,-0.2265532571  
Cl,-0.3113049481,1.4446550232,0.6961775549  
O,-0.7863874842,-1.0759278804,-0.258452755  
C,-2.1995366327,-0.8961052022,-0.0893025902  
H,-2.6723432488,-1.8179590299,-0.4176140184  
H,-2.4373108105,-0.7090803201,0.9577349844  
H,-2.5526726964,-0.0614752547,-0.6947058949  
Electronic energy = -1060.6260636  
Zero-point electronic energy = -1060.576715  
Thermal energy = -1060.570569  
Enthalpy = -1060.569625  
Free energy = -1060.607945  
Free energy (quasiharmonic approximation) = -1060.607610

Compound 8 C4H7B1Cl2  
B,-0.7995360565,0.0106531621,-0.2932441734  
C,0.5665180473,0.2213984046,-1.014705828  
H,0.8606884896,-0.6808305753,-1.5557761338  
H,0.5074966403,1.0413526724,-1.7361018092  
C,1.6292754614,0.5487749833,0.0330902707  
C,2.2544709877,-0.5545158568,0.8438639359  
C,3.0653730716,0.1687285143,-0.20064758  
H,1.4643896682,1.4850311258,0.5535267919  
H,1.9462886207,-1.5697905134,0.628767593  
H,2.4740368132,-0.3668240614,1.8864560621  
H,3.835903873,0.8527482821,0.1303762649

H, 3.3000945413, -0.3619853604, -1.1146890881  
Cl, -1.7700372591, 1.3947733842, 0.2219248691  
Cl, -1.3829228988, -1.6043341614, 0.1174788247  
Electronic energy = -1102.0826893  
Zero-point electronic energy = -1101.976056  
Thermal energy = -1101.968143  
Enthalpy = -1101.967199  
Free energy = -1102.010808  
Free energy (quasiharmonic approximation) = -1102.009211

B(OMe)(OCH<sub>2</sub>CH<sub>2</sub>CH<sub>2</sub>O) C<sub>4</sub>H<sub>9</sub>B<sub>1</sub>O<sub>3</sub>  
C, -1.7804128233, -1.0242111215, -0.1601913912  
C, -1.1808964071, 1.3892955336, -0.2007476047  
C, -2.0851242625, 0.3435497132, 0.432382452  
H, -2.0696053508, -1.0537395043, -1.2166964715  
H, -2.3288705898, -1.8112411419, 0.3584412311  
H, -1.2811568421, 2.3558567521, 0.2941755298  
H, -1.4336948337, 1.523801061, -1.2578542774  
H, -1.9182282382, 0.3198525289, 1.5130067107  
H, -3.13317342, 0.6023236173, 0.2624197851  
O, 0.1950803141, 1.0082380486, -0.1058111337  
O, -0.3918798164, -1.3391692824, -0.0537936889  
B, 0.5322502626, -0.3254848883, -0.0425643544  
O, 1.8433093645, -0.6849736623, 0.0461000822  
C, 2.8620370586, 0.3083955098, 0.0808231192  
H, 3.8176674625, -0.2117581492, 0.1255303928  
H, 2.8356053083, 0.937463168, -0.8118564404  
H, 2.7607328133, 0.9498018174, 0.9594960593  
Electronic energy = -408.6744642  
Zero-point electronic energy = -408.532429  
Thermal energy = -408.524236  
Enthalpy = -408.523292  
Free energy = -408.565663  
Free energy (quasiharmonic approximation) = -408.565314

B(O<sub>2</sub>COCF<sub>3</sub>)<sub>2</sub>(OMe) C<sub>5</sub>H<sub>3</sub>B<sub>1</sub>F<sub>6</sub>O<sub>5</sub>  
B, -0.0025968074, 1.1114680808, -0.11247415  
O, 0.3156874171, 2.3963100066, -0.2453153102  
C, -0.636865102, 3.4570221446, -0.4068295343  
H, -0.5450507905, 4.1237618386, 0.4488125469  
H, -0.3822980114, 3.9972688943, -1.3166998895  
H, -1.6540654882, 3.0733076407, -0.4722764835  
O, 0.9709263272, 0.1287092497, 0.0258690656  
C, 2.2195337482, 0.3166873192, 0.4967165349  
O, 2.5890147668, 1.1752996058, 1.2302034234  
O, -1.3380783919, 0.6959605647, -0.0970782895  
C, -1.8114568054, -0.5119450026, -0.4567919414  
O, -1.2974584136, -1.2956402314, -1.1870722055  
C, 3.1391490125, -0.8174734455, -0.0293158549  
C, -3.2003245038, -0.7321628708, 0.1991515873  
F, 3.1767015792, -0.7968036023, -1.3721362002  
F, 4.3779758236, -0.663829332, 0.4329682752  
F, 2.6791981701, -2.0152127944, 0.3638946945  
F, -3.0869436618, -0.7174149283, 1.5383396953  
F, -4.0485959737, 0.2468832873, -0.1616210706  
F, -3.7144828947, -1.8996864251, -0.1731348935  
Electronic energy = -1193.0009657  
Zero-point electronic energy = -1192.896111  
Thermal energy = -1192.878915  
Enthalpy = -1192.877971  
Free energy = -1192.947491  
Free energy (quasiharmonic approximation) = -1192.939660

Compound 11 C<sub>8</sub>H<sub>7</sub>B<sub>1</sub>F<sub>6</sub>O<sub>4</sub>  
B, -0.0081278078, 0.7021005805, 0.4685060488  
O, 0.9662112772, -0.2286901485, 0.1152044438  
C, 2.2606782506, 0.0321170033, -0.1293477861  
O, 2.7306879401, 1.0744206262, -0.4606184699  
O, -1.3134003599, 0.2340351736, 0.3507289813  
C, -1.7508755967, -0.7089055793, -0.507626745  
O, -1.2906908867, -0.9739133474, -1.5711689205  
C, 3.0961084894, -1.2617515131, 0.0589040435  
C, -3.0231917153, -1.3838729796, 0.0685026642  
F, 2.641539286, -2.2410030345, -0.734333215  
F, 4.3753394992, -1.0359583699, -0.2269023747  
F, 3.0076042751, -1.6749731547, 1.3368464981  
F, -2.7435987749, -1.9683907911, 1.2462886544  
F, -3.9863652012, -0.4691478984, 0.2703389961  
F, -3.4827705483, -2.3094284959, -0.7682062539  
C, 0.2258018535, 2.1367267675, 1.015054437  
H, 1.1924488522, 2.2509076033, 1.5093498687

H, -0.5538521463, 2.3620197273, 1.7482268547  
C, 0.1215274749, 3.1300779765, -0.1421171689  
C, -1.2284756581, 3.5087374627, -0.6931047815  
C, -0.4246951983, 4.5106372657, 0.0943830608  
H, 0.9289321262, 3.0548004793, -0.8594306506  
H, -2.1035388585, 3.0835079223, -0.2178249741  
H, -1.3263434948, 3.6520234661, -1.7609244587  
H, 0.029745094, 5.3362833833, -0.4370455982  
H, -0.7608081718, 4.7518098748, 1.0949468458  
Electronic energy = -1234.4609787  
Zero-point electronic energy = -1234.298574  
Thermal energy = -1234.279836  
Enthalpy = -1234.278892  
Free energy = -1234.351621  
Free energy (quasiharmonic approximation) = -1234.343484
